# Supplementary material for: Stereoselective skeletal modification of tryptanthrins to install chiral piperidine-2-ones enabled by Brønsted acid catalysis
Source: Royal Society of Chemistry journal article supplement (doi:10.1039/d3qo02029k), 2024-01-01

# Stereoselective Skeletal Modification of Tryptanthrins to Install Chiral Piperidine-2-Ones enabled by Brønsted Acid Catalysis†

Rong Zeng,<sup>a,b</sup> Xiang Zhang,<sup>b</sup> Yuan-Yuan Lei,<sup>b</sup> Zhuo-Zhuo Zhang,<sup>b</sup> Min Jiang,<sup>b</sup> Qing-Zhu Li,<sup>b</sup> Jun-Long Li<sup>\*a,b</sup> and Bo Han<sup>\*a</sup>

<sup>a</sup> State Key Laboratory of Southwestern Chinese Medicine Resources, School of Pharmacy, Chengdu University of Traditional Chinese Medicine, Chengdu 611137, PR China.

<sup>b</sup> Anti-infective Agent Creation Engineering Research Centre of Sichuan Province, Sichuan Industrial Institute of Antibiotics, School of Pharmacy, Chengdu University, Chengdu 610106, PR China.

Email: [hanbo@cdutcm.edu.cn](mailto:hanbo@cdutcm.edu.cn); [lijunlong709@hotmail.com](mailto:lijunlong709@hotmail.com).

## Supplementary Information

### Table of Contents

|                                                                                  |    |
|----------------------------------------------------------------------------------|----|
| 1. General Information .....                                                     | 2  |
| 2. Further Optimisation Studies .....                                            | 4  |
| 3. General Procedure for the synthesis of tryptanthrin derived aza-diene 1. .... | 5  |
| 4. General Procedure for the asymmetric [4 + 2] cyclisation. ....                | 10 |
| 5. Mechanism experiments. ....                                                   | 26 |
| 6. Crystal Data and Structure Refinement for 3a .....                            | 28 |
| 7. References and Notes .....                                                    | 30 |
| 8. Copies of <sup>1</sup> H, <sup>13</sup> C NMR, HPLC Spectra .....             | 31 |

## 1. General Information

### General Procedures.

All reactions were performed in over-dried or flame-dried reaction vessels, modified Schlenk flasks, or round-bottom flasks. The flasks were fitted with Teflon screw caps and reactions were conducted under an atmosphere of argon if needed. Gas-tight syringes with stainless steel needles were used to transfer air- and moisture-sensitive liquids. All moisture and/or air sensitive solid compounds were manipulated inside normal desiccators. Flash column chromatography was performed over silica gel (40 – 45  $\mu\text{m}$ , 300 – 400 mesh).

Analytical thin layer chromatography (TLC) was performed on silica gel HSGF<sub>254</sub> glass plates (purchased from Jiangyou silica gel development Co., Ltd, Yantai, China) containing a 254 nm fluorescent indicator. TLC plates were visualized by exposure to short wave ultraviolet light (254 nm) or I<sub>2</sub> and to a solution of KMnO<sub>4</sub> (1 g of KMnO<sub>4</sub>, 6 g of K<sub>2</sub>CO<sub>3</sub> and 0.1 g of KOH in 100 mL of H<sub>2</sub>O) or vanillin (2 g of vanillin and 4 mL of concentrated H<sub>2</sub>SO<sub>4</sub> in 100 mL of EtOH) followed by heating.

Organic solutions were concentrated at 30 – 40 °C on rotary evaporators at ~80 mbar followed by drying on vacuum pump below 1 mbar. Reaction temperatures are reported as the temperature of the bath surrounding the vessel unless otherwise stated.

### Materials.

Commercial reagents were obtained from Adamas-beta, Aldrich Chemical Co., Alfa Aesar, Leyan, Macklin and Energy Chemical and used as received. All-solvents were dried and/or distilled by standard methods.<sup>1,2,3</sup> Various tryptanthrins<sup>4</sup> and azlactones<sup>5</sup> was synthesized according to previous reports.

### Instrumentation.

Proton nuclear magnetic resonance (<sup>1</sup>H NMR) spectra were measured on a JEOL JNM-ECZ600R/S1 spectrometer at ambient temperature for <sup>1</sup>H at 600 MHz. Proton chemical shifts are reported in parts per million ( $\delta$  scale), and are referenced using tetramethylsilane (TMS) as an internal standard or residual protium in the NMR solvent (CDCl<sub>3</sub>:  $\delta$  7.26 (CHCl<sub>3</sub>) or DMSO-*d*<sub>6</sub>:  $\delta$  2.50 (CD<sub>2</sub>HSOCD<sub>3</sub>)). Data are reported as follows: chemical shift [multiplicity (s = singlet, d = doublet, t = triplet, q = quartet, m = multiplet, dd = doublet of doublets, td = triplet of doublets, brs = broad singlet), coupling constant(s) (Hz), integration].

Carbon-13 nuclear magnetic resonance (<sup>13</sup>C NMR) spectra measured on a JEOL JNM-ECZ600R/S1 spectrometer at ambient temperature for <sup>13</sup>C at 151 MHz.. Carbon

chemical shifts are reported in parts per million ( $\delta$  scale), and are referenced using the carbon resonances of the solvent ( $\delta$  77.00 (CDCl<sub>3</sub>) or  $\delta$  39.52 (DMSO-*d*<sub>6</sub>)). Data are reported as follows: chemical shift [multiplicity (if not singlet), assignment (C<sub>q</sub> = fully substituted carbon)].

High resolution mass spectra (HRMS) were performed on an Agilent 6230 time-of-flight (TOF) LC/MS instrument or a Waters SYNAPT G2 mass spectrometer by using an electrospray ionization (ESI) ionization source analyzed by quadrupole time-of-flight (Q-TOF). Melting points were determined on a SGW X-4 digital melting point apparatus and temperatures were not corrected.

Enantiomeric ratio (er) values were determined on an Agilent 1260 Infinity II chiral HPLC, using Daicel CHIRALPAK<sup>®</sup> IA, IC, columns with hexane and 2-propanol as eluent, hexane, DCM and CH<sub>3</sub>OH as eluent. Er values for several compounds were determined on a Waters Acquity UPC2 chiral HPLC using Daicel CHIRALPAK<sup>®</sup> IA, IG columns with CO<sub>2</sub> and 2-propanol as eluent.

Optical rotation was measured with a Rudolph Autopol IV automatic polarimeter at 20 °C using 100 mm cell of 2.5 mL capacity, and  $[\alpha]_D^{20}$  values reported in degrees.

Melting points were determined on a SGW X-4 digital melting point apparatus using open glass capillaries and temperatures were not corrected, reported in degrees Celsius.

## 2. Further Optimisation Studies

**Table S1.** Optimisation this reaction conditions. <sup>a</sup>

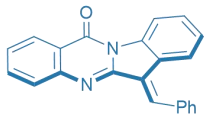

**1a**



**2a**

**Cat** (10 mol%)

solvent, 4Å MS, room temp.  
then additive

→



**3a**

---



**C7**



**C8**



**C9**

**C10** (DHQ)<sub>2</sub>PHAL

**C11** (DHQ)<sub>2</sub>AQN

**C12** (DHQ)<sub>2</sub>PYR



**C13**



**C14**

| Entry           | Catalyst | Additive             | Solvent | Yield (%) <sup>b</sup> | Er    |
|-----------------|----------|----------------------|---------|------------------------|-------|
| 1               | C7       | -                    | DCM     | n.r.                   | -     |
| 2               | C8       | -                    | DCM     | n.r.                   | -     |
| 3               | C9       | -                    | DCM     | n.r.                   | -     |
| 4               | C10      | -                    | DCM     | n.r.                   | -     |
| 5               | C11      | -                    | DCM     | n.r.                   | -     |
| 6               | C12      | -                    | DCM     | n.r.                   | -     |
| 7               | C13      | -                    | DCM     | n.r.                   | -     |
| 8               | C14      | -                    | DCM     | < 5                    | n.d.  |
| 9 <sup>c</sup>  | C1       | Sc(OTf) <sub>3</sub> | DCM     | 51                     | 90:10 |
| 10 <sup>c</sup> | C1       | TfOH                 | DCM     | n.r.                   | -     |
| 11 <sup>c</sup> | C1       | DBU                  | DCM     | n.r.                   | -     |
| 12 <sup>c</sup> | C1       | TMG                  | DCM     | n.r.                   | -     |
| 13 <sup>d</sup> | C1       | TEA                  | DCM     | 81                     | 95:5  |
| 14 <sup>e</sup> | C1       | TEA                  | DCM     | 70                     | 95:5  |

<sup>a</sup> Unless otherwise noted, reactions were performed with 0.10 mmol of **1a**, 0.15 mmol of **2a**, and 10 mol % catalyst **C** in 1.0 mL of solvent at room temp. for 8 h, then added with 0.3 mL of TEA for 0.5 h. <sup>b</sup> Isolated yield. <sup>c</sup> Performed with 20 mol% additive. <sup>d</sup> preformed with 0.2 mL TEA for 0.5 h. <sup>e</sup> preformed with 0.1 mL TEA for 0.5 h. n.r. : no reaction. n.r. : no detected.



### 3. General Procedure for the synthesis of tryptanthrin derived aza-diene 1.

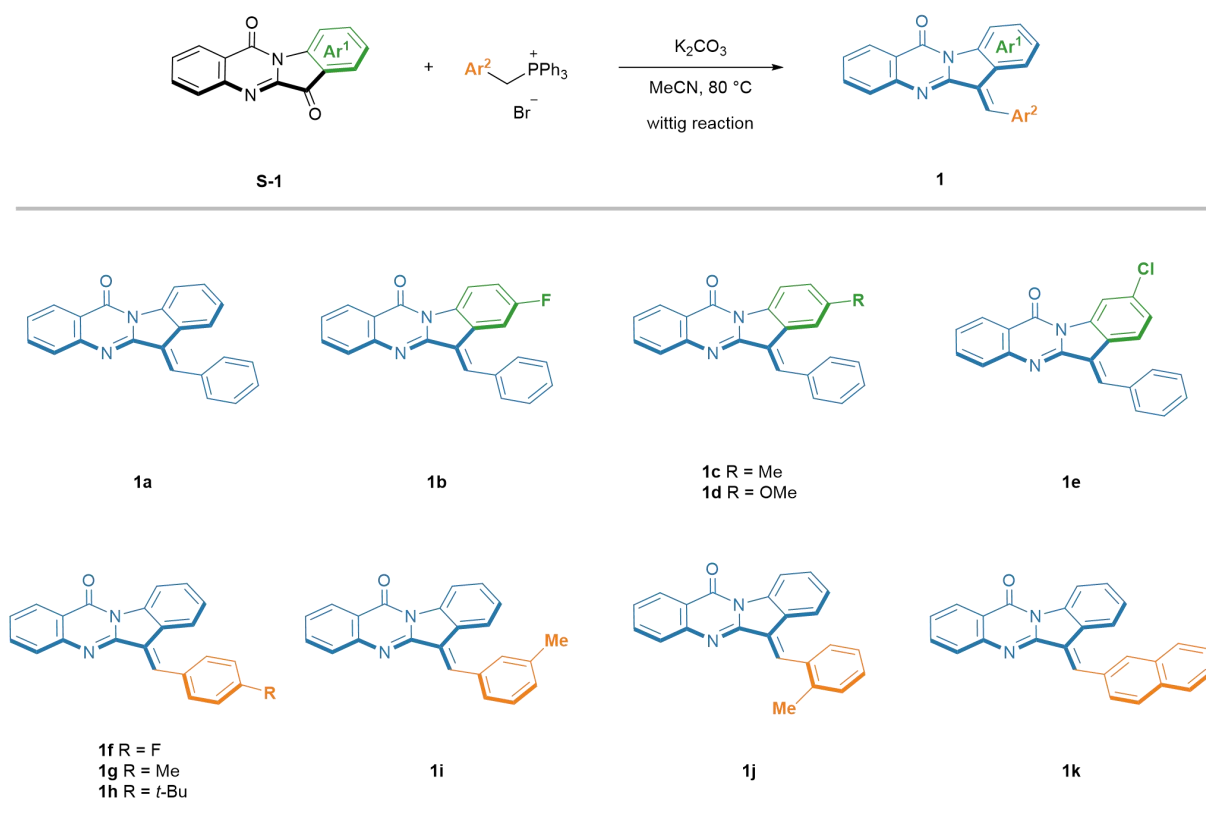

Tryptanthrin **S-1** were synthesized according to the reported literature procedures.<sup>4</sup> To an 100mL over-dried Schlenk tube was added substrates **S-1** (5.0 mmol),  $\text{K}_2\text{CO}_3$  (6.0 mmol) and different Wittig reagents (6.0 mmol). The Schlenk tube was subjected to three cycles of pressurization/depressurization using dry Ar. After that, under the protection of Ar atmosphere, the solvent of MeCN (10 mL) was added, and the reaction mixture was stirred at 80 °C for 12 hours. Then the mixture were filtered, and the obtained green solid were washed with a small amount of cold acetonitrile until changing to a yellow solid. After that, the crude product diluted with water and extracted by DCM three times. The combined organic phases were washed with brine, dried over with anhydrous  $\text{Na}_2\text{SO}_4$ , filtered and concentrated in vacuum to afford the corresponding tryptanthrin derived aza-diene **1**. All products were dried under vacuum and further analyzed by  $^1\text{H}$  NMR,  $^{13}\text{C}$  NMR, HRMS analysis, *etc.* Notice: **1a** was reported compound,<sup>6</sup> and some substrates are very difficult to dissolve in various deuterated solvents, such as **1f**, **1g**, **1k**.

**(E)-6-benzylidene-8-fluoroindolo[2,1-b]quinazolin-12(6H)-one-1b**

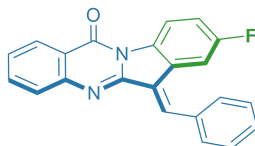

Prepared according to **General Procedure** to afford **1b** in 75% yield as a yellow solid, m. p. = 200 – 203 °C.

*NMR and HRMS data for the product 1b:*

**<sup>1</sup>H NMR (600 MHz, CDCl<sub>3</sub>) δ (ppm):** 8.67 – 8.64 (m, 1H), 8.41 (d, *J* = 8.4 Hz, 1H), 8.38 (s, 1H), 7.78 (d, *J* = 3.6 Hz, 2H), 7.67 (d, *J* = 7.8 Hz, 2H), 7.54 – 7.47 (m, 5H), 7.14 – 7.11 (m, 1H).

**<sup>13</sup>C NMR (151 MHz, CDCl<sub>3</sub>) δ (ppm):** 160.3 (d, *J*<sub>C-F</sub> = 244.2 Hz), 159.3, 152.6, 147.4, 136.2, 134.5, 134.3, 130.0, 129.2, 129.0, 127.7, 127.1 (d, *J*<sub>C-F</sub> = 2.9 Hz), 127.0, 126.8, 125.7 (d, *J*<sub>C-F</sub> = 8.7 Hz), 121.3, 118.3 (d, *J*<sub>C-F</sub> = 8.7 Hz), 116.8 (d, *J*<sub>C-F</sub> = 24.6 Hz), 110.0 (d, *J*<sub>C-F</sub> = 26.0 Hz).

**HRMS (ESI – TOF) *m/z*:** [M + Na]<sup>+</sup> calculated for C<sub>22</sub>H<sub>13</sub>FN<sub>2</sub>OH<sup>+</sup> 341.1085, found 341.1088.

**(E)-6-benzylidene-8-methylindolo[2,1-b]quinazolin-12(6H)-one-1c**

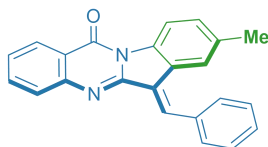

Prepared according to **General Procedure** to afford **1c** in 48% yield as a yellow solid, m. p. = 177 – 180 °C.

*NMR and HRMS data for the product 1c:*

**<sup>1</sup>H NMR (600 MHz, CDCl<sub>3</sub>) δ (ppm):** 8.54 (d, *J* = 8.4 Hz, 1H), 8.42 (d, *J* = 7.8 Hz, 1H), 8.31 (s, 1H), 7.78 – 7.70 (m, 4H), 7.62 (s, 1H), 7.52 – 7.46 (m, 4H), 7.24 (d, *J* = 8.4 Hz, 1H), 2.28 (s, 3H).

**<sup>13</sup>C NMR (151 MHz, CDCl<sub>3</sub>) δ (ppm):** 159.4, 153.0, 147.5, 137.9, 135.5, 135.1, 134.5, 134.1, 130.9, 129.6, 129.3, 128.7, 127.8, 127.6, 127.0, 126.6, 124.2, 123.2, 121.5, 116.9, 21.5.

**HRMS (ESI – TOF) *m/z*:** [M + Na]<sup>+</sup> calculated for C<sub>23</sub>H<sub>16</sub>N<sub>2</sub>ONa<sup>+</sup> 359.1155, found 359.1154.

**(E)-6-benzylidene-8-methoxyindolo[2,1-b]quinazolin-12(6H)-one-1d**

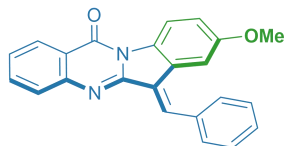

Prepared according to **General Procedure** to afford **1d** in 58% yield as a yellow solid, m. p. = 220 – 223 °C.

*NMR and HRMS data for the product 1d:*

**<sup>1</sup>H NMR (600 MHz, CDCl<sub>3</sub>) δ (ppm):** 8.61 – 8.55 (m, 3H), 8.42 (d, *J* = 7.8 Hz, 1H), 7.79 – 7.75 (m, 2H), 7.65 (s, 1H), 7.52 – 7.48 (m, 4H), 7.26 (s, 1H), 6.99 (d, *J* = 7.8 Hz, 1H), 3.91 (s, 3H).

**<sup>13</sup>C NMR (151 MHz, CDCl<sub>3</sub>) δ (ppm):** 159.3, 158.1, 150.6, 147.3, 135.4, 134.1, 133.8, 132.8, 132.2, 130.6, 129.0, 128.3, 128.1, 127.1, 126.7, 126.4, 121.4, 118.2, 114.8, 104.6, 55.8.

**HRMS (ESI – TOF) *m/z*:** [M + Na]<sup>+</sup> calculated for C<sub>23</sub>H<sub>16</sub>N<sub>2</sub>O<sub>2</sub>Na<sup>+</sup> 375.1104, found 375.1106.

**(E)-6-benzylidene-9-chloroindolo[2,1-b]quinazolin-12(6H)-one-1e**

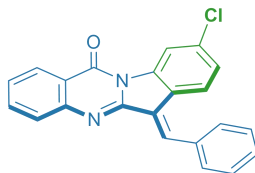

Prepared according to **General Procedure** to afford **1e** in 69% yield as a yellow solid, m. p. = 194 – 198 °C.

*NMR and HRMS data for the product 1e:*

**<sup>1</sup>H NMR (600 MHz, CDCl<sub>3</sub>) δ (ppm):** 8.72 – 8.72 (m, 1H), 8.41 (d, *J* = 8.4 Hz, 1H), 8.32 (s, 1H), 7.79 – 7.77 (m, 2H), 7.72 (d, *J* = 8.4 Hz, 1H), 7.67 (d, *J* = 7.8 Hz, 2H), 7.53 – 7.46 (m, 4H), 7.11 (d, *J* = 8.4 Hz, 1H).

**<sup>13</sup>C NMR (151 MHz, CDCl<sub>3</sub>) δ (ppm):** 159.4, 152.5, 147.4, 140.6, 135.8, 135.1, 134.8, 134.5, 129.8, 129.2, 128.9, 127.7, 127.2, 126.9, 126.8, 125.9, 123.5, 122.6, 121.2, 117.6.

**HRMS (ESI – TOF) *m/z*:** [M + Na]<sup>+</sup> calculated for C<sub>22</sub>H<sub>13</sub><sup>35</sup>ClN<sub>2</sub>OH<sup>+</sup> 357.0789, found 357.0792; calculated for C<sub>22</sub>H<sub>13</sub><sup>37</sup>ClN<sub>2</sub>OH<sup>+</sup> 359.0760, found 359.0763.

**(E)-6-(4-(tert-butyl)benzylidene)indolo[2,1-b]quinazolin-12(6H)-one-1h**

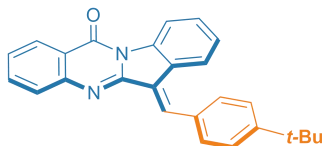

Prepared according to **General Procedure** to afford **1f** in 81% yield as a yellow solid, m. p. = 120 – 124 °C.

*NMR and HRMS data for the product 1f:*

**<sup>1</sup>H NMR (600 MHz, CDCl<sub>3</sub>) δ (ppm):** 8.68 (d, *J* = 7.8 Hz, 1H), 8.41 (d, *J* = 7.8 Hz, 1H), 8.30 (s, 1H), 7.95 (d, *J* = 8.4 Hz, 1H), 7.78 – 7.74 (m, 2H), 7.67 (d, *J* = 7.8 Hz, 2H), 7.54 – 7.41 (m, 4H), 7.16 (t, *J* = 7.8 Hz, 1H), 1.40 (s, 9H).

**<sup>13</sup>C NMR (151 MHz, CDCl<sub>3</sub>) δ (ppm):** 159.6, 153.3, 152.9, 147.5, 139.9, 135.1, 134.2, 133.0, 132.0, 129.9, 129.4, 127.5, 127.0, 126.8, 126.4, 125.6, 124.3, 122.7, 121.3, 117.2, 35.0, 31.2.

**HRMS (ESI – TOF) *m/z*:** [M + Na]<sup>+</sup> calculated for C<sub>26</sub>H<sub>22</sub>N<sub>2</sub>OH<sup>+</sup> 379.1805, found 379.1809.

**(E)-6-(3-methylbenzylidene)indolo[2,1-b]quinazolin-12(6H)-one-1i**

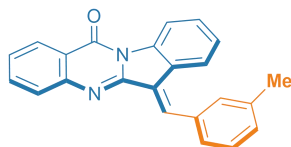

Prepared according to **General Procedure** to afford **1i** in 45% yield as a yellow solid, m. p. = 210 – 212 °C.

*NMR and HRMS data for the product 1i:*

**<sup>1</sup>H NMR (600 MHz, CDCl<sub>3</sub>) δ (ppm):** 8.69 (d, *J* = 7.2 Hz, 1H), 8.45 (d, *J* = 6.0 Hz, 1H), 8.39 (s, 1H), 7.82 – 7.79 (m, 2H), 7.60 – 7.30 (m, 7H), 7.10 (s, 1H), 2.43 (s, 3H).

**<sup>13</sup>C NMR (151 MHz, CDCl<sub>3</sub>) δ (ppm):** 159.6, 152.4, 147.6, 139.9, 137.3, 134.4, 134.3, 134.2, 130.6, 130.1, 129.5, 128.6, 128.4, 127.7, 127.1, 126.7, 126.0, 125.8, 124.4, 123.0, 121.5, 117.2, 20.1.

**HRMS (ESI – TOF) *m/z*:** [M + Na]<sup>+</sup> calculated for C<sub>23</sub>H<sub>16</sub>N<sub>2</sub>OH<sup>+</sup> 337.1335, found 337.1343.

**(E)-6-(2-methylbenzylidene)indolo[2,1-b]quinazolin-12(6H)-one-1j**

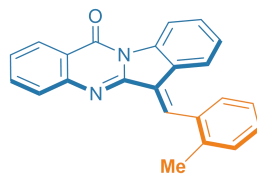

Prepared according to **General Procedure** to afford **1k** in 38% yield as a yellow solid, m. p. = 208 – 211 °C.

*NMR and HRMS data for the product 1k:*

**<sup>1</sup>H NMR (600 MHz, CDCl<sub>3</sub>) δ (ppm):** 8.64 (d, *J* = 8.4 Hz, 1H), 8.60 (s, 1H), 8.42 (d, *J* = 8.4 Hz, 1H), 8.29 (d, *J* = 7.8 Hz, 1H), 7.74 (t, *J* = 8.4 Hz, 3H), 7.64 (s, 1H), 7.53 – 7.50 (m, 1H), 7.44 (t, *J* = 7.8 Hz, 1H), 7.39 (t, *J* = 7.8 Hz, 1H), 7.34 (t, *J* = 7.2 Hz, 1H), 7.28 – 7.26 (m, 1H), 2.49 (s, 3H).

**<sup>13</sup>C NMR (151 MHz, CDCl<sub>3</sub>) δ (ppm):** 159.7, 150.4, 147.3, 138.0, 137.6, 135.5, 134.1, 134.0, 133.4, 131.4, 130.1, 129.2, 128.2, 128.0, 127.7, 127.1, 126.9, 126.0, 125.8, 121.3, 119.0, 117.2, 21.5.

**HRMS (ESI – TOF) *m/z*:** [M + Na]<sup>+</sup> calculated for C<sub>23</sub>H<sub>16</sub>N<sub>2</sub>OH<sup>+</sup> 337.1335, found 337.1342.

#### 4. General Procedure for the asymmetric [4 + 2] cyclisation.

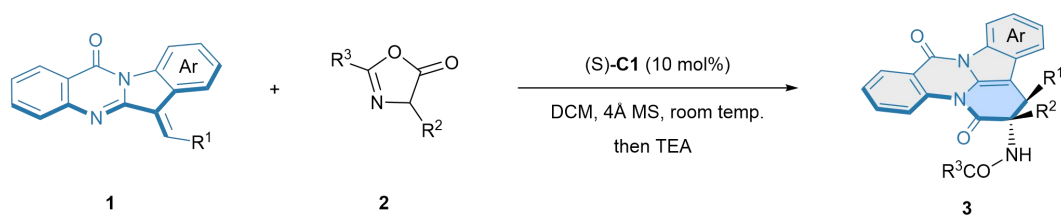

To an over-dried Schlenk tube was added substrates **1** (0.10 mmol), (S)-C1 (10 mol %), 4Å MS (50 mg) and substrates **2** (0.15 mmol) in dry DCM (1 mL), and the reaction mixture was stirred at room temperature for 8 hours. Then the mixture were added with 0.3 ml of TEA for 0.5 h. After that, the mixture were concentrated in vacuum, and purified by column chromatography on silica gel (petroleum ether/ethyl acetate = 30/1 to 6:1) to afford the corresponding product **3**. All products were dried under vacuum and further analyzed by  $^1\text{H}$  NMR,  $^{13}\text{C}$  NMR, HRMS, chiral HPLC analysis, *etc.*

##### *Procedure for scale-up synthesis of 3a*

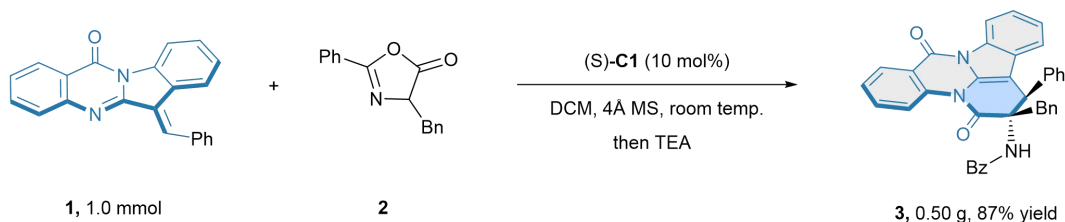

To an over-dried Schlenk tube was added substrates **1a** (1.0 mmol), (S)-C1 (10 mol %), 4Å MS (500 mg) and substrates **2a** (1.5 mmol) in dry DCM (10 mL), and the reaction mixture was stirred at room temperature for 12 hours. Then the mixture were added with 3 ml of TEA for 1 h. After that, the mixture were concentrated in vacuum, and purified by column chromatography on silica gel (petroleum ether/ethyl acetate = 30/1 to 10:1) to afford the corresponding product **3a** in 87% yield and 95:5 er.

**N-((1R,2S)-2-benzyl-3,8-dioxo-1-phenyl-2,3-dihydro-1H,8H-3a,8a-diazabenzof[e]acephenanthrylen-2-yl)benzamide-3a**

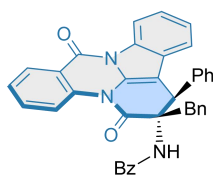

Prepared according to **General Procedure**, the crude product was purified by silica gel chromatography (petroleum ether/ethyl acetate 30:1 to 10:1) to afford **3a** (51.7 mg, 90% yield) as a yellow solid, m. p. = 201 – 204 °C, and the enantiomeric ratio of **3a** was determined to be 95:5 by chiral HPLC analysis on Chiralpak IG column (CO<sub>2</sub>/i-PrOH = 50:50, flow rate: 1.5 mL/min), UV 270 nm, *t<sub>R</sub>* (major) = 17.75 min, *t<sub>R</sub>* (minor) = 13.04 min; [α]<sub>D</sub><sup>20</sup> = -107.8 (*c* = 0.75 in CH<sub>2</sub>Cl<sub>2</sub>).

*NMR and HRMS data for the product 3a:*

**<sup>1</sup>H NMR (600 MHz, CDCl<sub>3</sub>) δ (ppm):** 8.80 (d, *J* = 9.0 Hz, 1H), 8.67 (d, *J* = 7.8 Hz, 1H), 8.48 (d, *J* = 7.8 Hz, 1H), 7.75 – 7.72 (m, 1H), 7.66 (d, *J* = 8.4 Hz, 2H), 7.51 (t, *J* = 7.8 Hz, 1H), 7.44 – 7.38 (m, 8H), 7.32 – 7.17 (m, 5H), 6.92 (d, *J* = 7.2 Hz, 2H), 6.82 (d, *J* = 7.2 Hz, 1H), 6.37 (s, 1H), 5.75 (s, 1H), 3.73 (d, *J* = 14.4 Hz, 1H), 2.92 (d, *J* = 14.4 Hz, 1H).

**<sup>13</sup>C NMR (151 MHz, CDCl<sub>3</sub>) δ (ppm):** 168.2, 157.3, 136.8, 135.5, 135.1, 134.2, 134.0, 132.0, 131.2, 131.1, 130.9, 130.4, 129.0, 128.8, 128.7, 128.4, 128.2, 127.9, 127.3, 127.0, 124.8, 124.4, 122.8, 119.1, 118.6, 116.3, 116.2, 95.4, 65.6, 44.2, 38.2.

**HRMS (ESI – TOF) *m/z*:** [M + Na]<sup>+</sup> calculated for C<sub>38</sub>H<sub>27</sub>N<sub>3</sub>O<sub>3</sub>Na<sup>+</sup> 596.1945, found 596.1945.

**N-((1R,2S)-2-benzyl-11-fluoro-3,8-dioxo-1-phenyl-2,3-dihydro-1H,8H-3a,8a-diazabenzof[e]acephenanthrylen-2-yl)benzamide-3b**

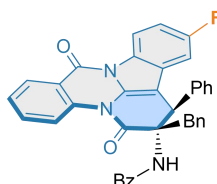

Prepared according to **General Procedure**, the crude product was purified by silica gel chromatography (petroleum ether/ethyl acetate 30:1 to 10:1) to afford **3b** (50.9 mg, 86% yield) as a yellow solid, m. p. = 135 – 137 °C, and the enantiomeric ratio of **3b** was determined to be 96:4 by chiral HPLC analysis on Chiralpak IA column (DCM/*n*-hexane/MeOH = 75:25:0.3,

flow rate: 0.6 mL/min), UV 254 nm,  $t_R$  (major) = 6.19 min,  $t_R$  (minor) = 6.97 min;  $[\alpha]_D^{20} = -47.6$  ( $c = 0.63$  in  $\text{CH}_2\text{Cl}_2$ ).

*NMR and HRMS data for the product 3b:*

**$^1\text{H}$  NMR (600 MHz,  $\text{CDCl}_3$ )  $\delta$  (ppm):** 8.78 (d,  $J = 8.4$  Hz, 1H), 8.64 – 8.61 (m, 1H), 8.49 (d,  $J = 7.8$  Hz, 1H), 7.74 (t,  $J = 7.8$  Hz, 1H), 7.66 (d,  $J = 7.8$  Hz, 2H), 7.52 (t,  $J = 7.2$  Hz, 1H), 7.46 – 7.37 (m, 8H), 7.28 (t,  $J = 7.2$  Hz, 1H), 7.24 – 7.22 (m, 2H), 7.00 (t,  $J = 9.0$  Hz, 1H), 6.91 (d,  $J = 7.8$  Hz, 2H), 6.45 (d,  $J = 9.6$  Hz, 1H), 6.35 (s, 1H), 5.75 (s, 1H), 3.70 (d,  $J = 14.4$  Hz, 1H), 2.90 (d,  $J = 14.4$  Hz, 1H).

**$^{13}\text{C}$  NMR (151 MHz,  $\text{CDCl}_3$ )  $\delta$  (ppm):** 168.3, 168.1, 168.0 (d,  $J_{\text{C-F}} = 241.3$  Hz), 157.0, 136.7, 135.2, 134.9, 134.1, 133.8, 132.4, 132.0, 130.8, 130.3, 129.0, 128.82, 128.75, 128.5, 128.4, 127.9, 127.5, 127.0, 125.0, 118.7, 117.4 (d,  $J_{\text{C-F}} = 10.1$  Hz), 116.0, 110.4 (d,  $J_{\text{C-F}} = 26.0$  Hz), 105.2 (d,  $J_{\text{C-F}} = 26.0$  Hz), 95.3 (d,  $J_{\text{C-F}} = 4.3$  Hz), 65.6, 44.0, 38.3.

**$^{19}\text{F}$  NMR (564 MHz,  $\text{CDCl}_3$ )  $\delta$  (ppm):** -115.3.

**HRMS (ESI – TOF)  $m/z$ :**  $[\text{M} + \text{Na}]^+$  calculated for  $\text{C}_{38}\text{H}_{26}\text{FN}_3\text{O}_3\text{Na}^+$  614.1850, found 614.1851.

***N-((1R,2S)-2-benzyl-11-methyl-3,8-dioxo-1-phenyl-2,3-dihydro-1H,8H-3a,8a-diazabenzof[e]acephenanthrylen-2-yl)benzamide-3c***

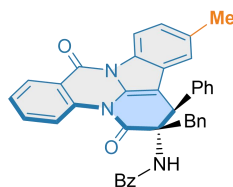

Prepared according to **General Procedure**, the crude product was purified by silica gel chromatography (petroleum ether/ethyl acetate 30:1 to 10:1) to afford **3c** (47.0 mg, 80% yield) as a yellow solid, m. p. = 200 – 202 °C, and the enantiomeric ratio of **3c** was determined to be 92:8 by chiral HPLC analysis on Chiralpak IC column ( $n$ -hexane/ $i$ -PrOH = 70:30, flow rate: 1.0 mL/min), UV 270 nm,  $t_R$  (major) = 17.91 min,  $t_R$  (minor) = 9.85 min;  $[\alpha]_D^{20} = -59.4$  ( $c = 0.80$  in  $\text{CH}_2\text{Cl}_2$ ).

*NMR and HRMS data for the product 3c:*

**$^1\text{H}$  NMR (600 MHz,  $\text{CDCl}_3$ )  $\delta$  (ppm):** 8.80 (d,  $J = 8.4$  Hz, 1H), 8.55 (d,  $J = 8.4$  Hz, 1H), 8.50 – 8.49 (m, 1H), 7.74 – 7.71 (m, 1H), 7.63 (d,  $J = 7.8$  Hz, 2H), 7.50 (t,  $J = 7.2$  Hz, 1H), 7.44 – 7.39 (m, 8H), 7.29 – 7.22 (m, 3H), 7.13 (d,  $J = 8.4$  Hz, 1H), 6.93 (d,  $J = 7.8$  Hz, 2H), 6.64 (s, 1H), 6.31 (s, 1H), 5.61 (s, 1H), 3.76 (d,  $J = 14.4$  Hz, 1H), 2.92 (d,  $J = 14.4$  Hz, 1H), 2.31 (s, 3H).



**<sup>13</sup>C NMR (151 MHz, CDCl<sub>3</sub>) δ (ppm):** 168.4, 168.2, 157.1, 136.8, 135.6, 135.0, 134.21, 134.17, 134.1, 132.0, 131.2, 130.8, 130.4, 129.4, 129.0, 128.7, 128.4, 128.2, 127.8, 127.5, 127.0, 124.8, 124.1, 119.1, 118.6, 116.3, 116.0, 95.2, 65.5, 44.4, 38.0, 21.7.

**HRMS (ESI – TOF) *m/z*:** [M + Na]<sup>+</sup> calculated for C<sub>39</sub>H<sub>29</sub>N<sub>3</sub>O<sub>3</sub>Na<sup>+</sup> 610.2101, found 610.2107.

***N-((1R,2S)-2-benzyl-11-methoxy-3,8-dioxo-1-phenyl-2,3-dihydro-1H,8H-3a,8a-diazabenzofelacephenanthrylen-2-yl)benzamide-3d***

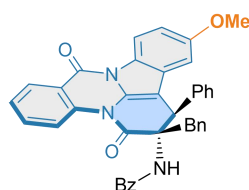

Prepared according to **General Procedure**, the crude product was purified by silica gel chromatography (petroleum ether/ethyl acetate 30:1 to 6:1) to afford **3d** (44.7 mg, 74% yield) as a yellow solid, m. p. = 230 – 235°C, and the enantiomeric ratio of **3d** was determined to be 98:2 by chiral HPLC analysis on Chiralpak IA column (DCM/*n*-hexane/MeOH = 75:25:0.3, flow rate: 0.6 mL/min), UV 254 nm, *t<sub>R</sub>* (major) = 6.43 min, *t<sub>R</sub>* (minor) = 7.28 min; [α]<sub>D</sub><sup>20</sup> = -146.3 (*c* = 0.53 in CH<sub>2</sub>Cl<sub>2</sub>).

*NMR and HRMS data for the product 3d:*

**<sup>1</sup>H NMR (600 MHz, CDCl<sub>3</sub>) δ (ppm):** 8.80 (d, *J* = 8.4 Hz, 1H), 8.58 (d, *J* = 9.0 Hz, 1H), 8.51 (d, *J* = 7.8 Hz, 1H), 7.74 – 7.71 (m, 1H), 7.65 (d, *J* = 8.4 Hz, 2H), 7.53 – 7.50 (m, 1H), 7.46 – 7.40 (m, 8H), 7.29 – 7.26 (m, 1H), 7.25 – 7.22 (m, 2H), 6.92 – 6.89 (m, 3H), 6.33 (s, 1H), 6.25 (s, 1H), 5.75 (s, 1H), 3.73 (d, *J* = 14.4 Hz, 1H), 3.62 (s, 3H), 2.92 (d, *J* = 15.0 Hz, 1H).

**<sup>13</sup>C NMR (151 MHz, CDCl<sub>3</sub>) δ (ppm):** 168.25, 168.17, 156.9, 156.8, 136.7, 135.2, 134.9, 134.2, 133.9, 132.0, 131.6, 131.0, 130.3, 128.9, 128.8, 128.7, 128.5, 128.3, 128.2, 127.9, 127.0, 125.7, 124.9, 118.6, 117.1, 116.3, 110.6, 102.8, 95.3, 65.6, 55.3, 44.1, 38.2.

**HRMS (ESI – TOF) *m/z*:** [M + Na]<sup>+</sup> calculated for C<sub>39</sub>H<sub>29</sub>N<sub>3</sub>O<sub>4</sub>Na<sup>+</sup> 626.2050, found 626.2051.

*N-((1R,2S)-2-benzyl-10-chloro-3,8-dioxo-1-phenyl-2,3-dihydro-1H,8H-3a,8a-diazabenz[*e*]acephenanthrylen-2-yl)benzamide-3e*

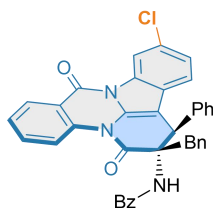

Prepared according to **General Procedure**, the crude product was purified by silica gel chromatography (petroleum ether/ethyl acetate 30:1 to 10:1) to afford **3e** (52.9 mg, 87% yield) as a yellow solid, m. p. = 200 – 205 °C, and the enantiomeric ratio of **3e** was determined to be 97:3 by chiral HPLC analysis on Chiralpak IA column (DCM/*n*-hexane/MeOH = 75:25:0.3, flow rate: 0.6 mL/min), UV 254 nm,  $t_R$  (major) = 6.23 min,  $t_R$  (minor) = 7.09 min;  $[\alpha]_D^{20}$  = -67.7 ( $c$  = 0.75 in CH<sub>2</sub>Cl<sub>2</sub>).

*NMR and HRMS data for the product 3e:*

**<sup>1</sup>H NMR (600 MHz, CDCl<sub>3</sub>) δ (ppm):** 8.79 (d,  $J$  = 8.4 Hz, 1H), 8.74 – 8.74 (m, 1H), 8.52 (d,  $J$  = 8.4 Hz, 1H), 7.80 (d,  $J$  = 8.4 Hz, 1H), 7.76 – 7.73 (m, 1H), 7.67 – 7.65 (m, 2H), 7.54 – 7.36 (m, 9H), 7.24 (t,  $J$  = 7.8 Hz, 2H), 7.16 (d,  $J$  = 8.4 Hz, 1H), 6.91 (d,  $J$  = 6.6 Hz, 2H), 6.70 (d,  $J$  = 9.0 Hz, 1H), 6.33 (s, 1H), 5.82 (s, 1H), 3.68 (d,  $J$  = 14.4 Hz, 1H), 2.89 (d,  $J$  = 15.0 Hz, 1H).

**<sup>13</sup>C NMR (151 MHz, CDCl<sub>3</sub>) δ (ppm):** 168.3, 168.0, 157.2, 136.8, 135.4, 135.1, 134.1, 133.7, 133.3, 132.1, 130.9, 130.3, 129.7, 128.9, 128.8, 128.6, 128.4, 128.0, 127.6, 127.3, 127.0, 125.8, 125.1, 124.9, 120.0, 118.7, 116.5, 116.0, 95.2, 65.7, 43.9, 38.4.

**HRMS (ESI – TOF)  $m/z$ :**  $[M + Na]^+$  calculated for C<sub>38</sub>H<sub>26</sub><sup>35</sup>ClN<sub>3</sub>O<sub>3</sub>Na<sup>+</sup> 630.1555, found 630.1559; calculated for C<sub>38</sub>H<sub>26</sub><sup>37</sup>ClN<sub>3</sub>O<sub>3</sub>Na<sup>+</sup> 632.1525, found 632.1533.

*N-((1R,2S)-2-benzyl-1-(4-fluorophenyl)-3,8-dioxo-2,3-dihydro-1H,8H-3a,8a-diazabenz[*e*]acephenanthrylen-2-yl)benzamide-3f*

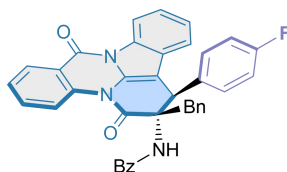

Prepared according to **General Procedure**, the crude product was purified by silica gel chromatography (petroleum ether/ethyl acetate 30:1 to 10:1) to afford **3f** (41.4 mg, 70% yield) as a yellow solid, m. p. = 130 – 133 °C, and the enantiomeric ratio of **3f** was determined to be

92:8 by chiral HPLC analysis on Chiralpak IC column (*n*-hexane/*i*-PrOH = 70:30, flow rate: 1.0 mL/min), UV 270 nm,  $t_R$  (major) = 12.12 min,  $t_R$  (minor) = 10.19 min;  $[\alpha]_D^{20} = -42.5$  ( $c = 0.76$  in  $\text{CH}_2\text{Cl}_2$ ).

*NMR and HRMS data for the product 3f:*

**$^1\text{H}$  NMR (600 MHz,  $\text{CDCl}_3$ )  $\delta$  (ppm):** 8.78 (d,  $J = 8.4$  Hz, 1H), 8.69 (d,  $J = 8.4$  Hz, 1H), 8.49 (d,  $J = 7.8$  Hz, 1H), 7.74 – 7.71 (m, 1H), 7.67 – 7.66 (m, 2H), 7.54 – 7.51 (m, 1H), 7.47 – 7.19 (m, 10H), 7.12 – 7.09 (m, 2H), 6.91 (d,  $J = 6.6$  Hz, 2H), 6.77 (d,  $J = 7.2$  Hz, 1H), 6.38 (s, 1H), 5.87 (s, 1H), 3.68 (d,  $J = 14.4$  Hz, 1H), 2.85 (d,  $J = 14.4$  Hz, 1H).

**$^{13}\text{C}$  NMR (151 MHz,  $\text{CDCl}_3$ )  $\delta$  (ppm):** 168.4, 168.0, 162.3 (d,  $J_{\text{C-F}} = 248.5$  Hz), 157.2, 136.8, 135.1, 134.1, 133.6, 132.5 (d,  $J_{\text{C-F}} = 8.7$  Hz), 132.1, 131.2, 131.1, 130.2, 129.1, 128.9, 128.8, 128.0, 127.1, 127.0, 124.9, 124.5, 122.9, 119.1, 118.6, 116.4, 116.2, 115.3 (d,  $J_{\text{C-F}} = 21.7$  Hz), 95.1, 65.7, 43.2, 38.3.

**$^{19}\text{F}$  NMR (564 MHz,  $\text{CDCl}_3$ )  $\delta$  (ppm):** -109.0.

**HRMS (ESI – TOF)  $m/z$ :**  $[\text{M} + \text{Na}]^+$  calculated for  $\text{C}_{38}\text{H}_{26}\text{FN}_3\text{O}_3\text{Na}^+$  614.1850, found 614.1847.

***N-((1R,2S)-2-benzyl-3,8-dioxo-1-(*p*-tolyl)-2,3-dihydro-1*H*,8*H*-3*a*,8*a*-diazabenzof[e]acephenanthrylen-2-yl)benzamide-3*g****

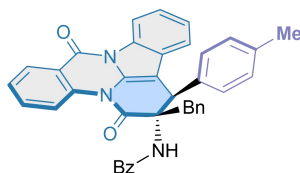

Prepared according to **General Procedure**, the crude product was purified by silica gel chromatography (petroleum ether/ethyl acetate 30:1 to 10:1) to afford **3g** (48.2 mg, 82% yield) as a yellow solid, m. p. = 136 – 138 °C, and the enantiomeric ratio of **3g** was determined to be 96:4 by chiral HPLC analysis on Chiralpak IC column (DCM/*n*-hexane/MeOH = 75:25:0.3, flow rate: 0.6 mL/min), UV 254 nm,  $t_R$  (major) = 9.36 min,  $t_R$  (minor) = 7.58 min;  $[\alpha]_D^{20} = -88.1$  ( $c = 0.77$  in  $\text{CH}_2\text{Cl}_2$ ).

*NMR and HRMS data for the product 3g:*

**$^1\text{H}$  NMR (600 MHz,  $\text{CDCl}_3$ )  $\delta$  (ppm):** 8.72 – 8.68 (m, 1H), 8.50 – 8.49 (m, 1H), 8.36 – 8.32 (m, 2H), 7.84 – 7.81 (m, 1H), 7.58 (d,  $J = 8.4$  Hz, 2H), 7.48 – 7.45 (m, 2H), 7.38 – 7.35 (m, 2H), 7.27 – 7.17 (m, 11H), 7.10 – 7.08 (m, 1H), 5.13 (s, 1H), 3.67 (d,  $J = 13.8$  Hz, 1H), 2.90 (d,  $J = 15.0$  Hz, 1H), 2.30 (s, 3H).

**<sup>13</sup>C NMR (151 MHz, CDCl<sub>3</sub>) δ (ppm):** 169.3, 167.3, 156.9, 136.9, 136.3, 135.7, 134.6, 134.0, 133.8, 131.4, 131.3, 130.8, 130.3, 129.5, 129.0, 128.1, 127.6, 127.4, 127.3, 126.5, 124.1, 124.0, 121.7, 117.9, 117.8, 115.5, 115.4, 95.8, 64.6, 44.2, 36.7, 20.6.

**HRMS (ESI – TOF) *m/z*:** [M + Na]<sup>+</sup> calculated for C<sub>39</sub>H<sub>29</sub>N<sub>3</sub>O<sub>3</sub>Na<sup>+</sup> 610.2101, found 610.2106.

***N-((1R,2S)-2-benzyl-1-(4-(tert-butyl)phenyl)-3,8-dioxo-2,3-dihydro-1H,8H-3a,8a-diazabenzof[e]acephenanthrylen-2-yl)benzamide-3h***

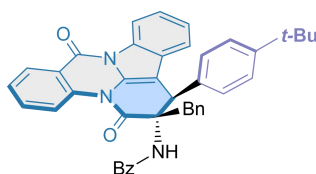

Prepared according to **General Procedure**, the crude product was purified by silica gel chromatography (petroleum ether/ethyl acetate 30:1 to 10:1) to afford **3h** (55.4 mg, 88% yield) as a yellow solid, m. p. = 126 – 128 °C, and the enantiomeric ratio of **3h** was determined to be 93:7 by chiral HPLC analysis on Chiralpak IA column (CO<sub>2</sub>/*i*-PrOH = 60:40, flow rate: 1.5 mL/min), UV 270 nm, *t<sub>R</sub>* (major) = 10.32 min, *t<sub>R</sub>* (minor) = 8.19 min; [α]<sub>D</sub><sup>20</sup> = -82.4 (*c* = 0.25 in CH<sub>2</sub>Cl<sub>2</sub>).

*NMR and HRMS data for the product 3h:*

**<sup>1</sup>H NMR (600 MHz, CDCl<sub>3</sub>) δ (ppm):** 8.80 (d, *J* = 8.4 Hz, 1H), 8.64 (d, *J* = 7.8 Hz, 1H), 8.45 (d, *J* = 7.8 Hz, 1H), 7.75 – 7.72 (m, 1H), 7.64 (d, *J* = 8.4 Hz, 2H), 7.50 (t, *J* = 7.8 Hz, 1H), 7.42 – 7.38 (m, 5H), 7.32 – 7.18 (m, 7H), 6.96 (d, *J* = 7.8 Hz, 2H), 6.88 (d, *J* = 8.4 Hz, 1H), 6.41 (d, *J* = 6.0 Hz, 1H), 5.57 (s, 1H), 3.76 (d, *J* = 14.4 Hz, 1H), 2.95 (d, *J* = 14.4 Hz, 1H), 1.37 (s, 9H).

**<sup>13</sup>C NMR (151 MHz, CDCl<sub>3</sub>) δ (ppm):** 168.6, 168.2, 157.3, 151.1, 136.8, 135.0, 134.3, 134.2, 132.4, 131.9, 131.2, 131.0, 130.5, 130.3, 128.9, 128.7, 128.6, 127.7, 127.4, 127.0, 125.3, 124.7, 124.3, 122.7, 119.0, 118.6, 116.3, 116.1, 95.7, 65.6, 43.9, 37.9, 34.6, 31.3.

**HRMS (ESI – TOF) *m/z*:** [M + Na]<sup>+</sup> calculated for C<sub>42</sub>H<sub>35</sub>N<sub>3</sub>O<sub>3</sub>Na<sup>+</sup> 652.2571, found 652.2579.

**N-((1R,2S)-2-benzyl-3,8-dioxo-1-(m-tolyl)-2,3-dihydro-1H,8H-3a,8a-diazabenzof[e]acephenanthrylen-2-yl)benzamide-3i**

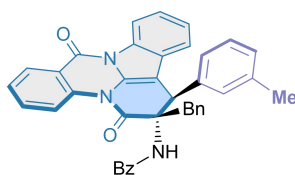

Prepared according to **General Procedure**, the crude product was purified by silica gel chromatography (petroleum ether/ethyl acetate 30:1 to 10:1) to afford **3i** (48.2 mg, 82% yield) as a yellow solid, m. p. = 88 – 90 °C, and the enantiomeric ratio of **3i** was determined to be 92:8 by chiral HPLC analysis on Chiralpak IC column (DCM/*n*-hexane/MeOH = 75:25:0.3, flow rate: 0.6 mL/min), UV 254 nm,  $t_R$  (major) = 10.42 min,  $t_R$  (minor) = 8.13 min;  $[\alpha]_D^{20}$  = -88.9 ( $c$  = 0.73 in CH<sub>2</sub>Cl<sub>2</sub>).

*NMR and HRMS data for the product 3i:*

**<sup>1</sup>H NMR (600 MHz, CDCl<sub>3</sub>)  $\delta$  (ppm):** 8.80 (d,  $J$  = 9.0 Hz, 1H), 8.67 (d,  $J$  = 8.4 Hz, 1H), 8.49 – 8.47 (m, 1H), 7.73 (t,  $J$  = 7.8 Hz, 1H), 7.65 (d,  $J$  = 6.6 Hz, 2H), 7.51 (t,  $J$  = 7.2 Hz, 1H), 7.45 – 7.40 (m, 3H), 7.32 – 7.18 (m, 9H), 6.93 (d,  $J$  = 7.8 Hz, 2H), 6.85 (d,  $J$  = 8.4 Hz, 1H), 6.36 (s, 1H), 5.66 (s, 1H), 3.75 (d,  $J$  = 14.4 Hz, 1H), 2.94 (d,  $J$  = 14.4 Hz, 1H), 2.34 (s, 3H).

**<sup>13</sup>C NMR (151 MHz, CDCl<sub>3</sub>)  $\delta$  (ppm):** 168.31, 168.27, 157.3, 138.0, 136.8, 135.3, 135.1, 134.3, 134.1, 131.9, 131.6, 131.2, 131.0, 130.4, 129.0, 128.9, 128.7, 128.1, 127.9, 127.8, 127.4, 127.0, 124.8, 124.4, 122.7, 119.1, 118.6, 116.3, 116.2, 95.5, 65.6, 44.1, 38.1, 21.5.

**HRMS (ESI – TOF)  $m/z$ :**  $[M + Na]^+$  calculated for C<sub>39</sub>H<sub>29</sub>N<sub>3</sub>O<sub>3</sub>Na<sup>+</sup> 610.2101, found 610.2098.

**N-((1R,2S)-2-benzyl-3,8-dioxo-1-(o-tolyl)-2,3-dihydro-1H,8H-3a,8a-diazabenzof[e]acephenanthrylen-2-yl)benzamide-3j**

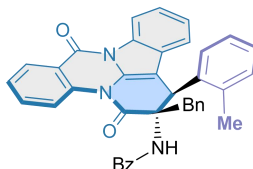

Prepared according to **General Procedure**, the crude product was purified by silica gel chromatography (petroleum ether/ethyl acetate 30:1 to 10:1) to afford **3j** (37.6 mg, 64% yield) as a yellow solid, m. p. = 136 – 138 °C, and the enantiomeric ratio of **3j** was determined to be

82:18 by chiral HPLC analysis on Chiralpak IC column (DCM/*n*-hexane/MeOH = 75:25:0.3, flow rate: 0.6 mL/min), UV 254 nm,  $t_R$  (major) = 8.74 min,  $t_R$  (minor) = 7.57 min;  $[\alpha]_D^{20} = -43.9$  ( $c = 0.63$  in  $\text{CH}_2\text{Cl}_2$ ).

*NMR and HRMS data for the product 3j:*

**$^1\text{H}$  NMR (600 MHz,  $\text{CDCl}_3$ )  $\delta$  (ppm):** 8.80 (d,  $J = 8.4$  Hz, 1H), 8.66 (d,  $J = 8.4$  Hz, 1H), 8.48 (d,  $J = 7.8$  Hz, 1H), 7.74 – 7.71 (m, 1H), 7.66 – 7.65 (m, 2H), 7.50 (t,  $J = 7.8$  Hz, 1H), 7.44 – 7.39 (m, 3H), 7.34 – 7.24 (m, 7H), 7.15 – 7.12 (m, 2H), 6.95 (d,  $J = 7.8$  Hz, 2H), 6.58 – 6.57 (m, 2H), 5.84 (s, 1H), 3.78 (d,  $J = 14.4$  Hz, 1H), 3.10 (d,  $J = 14.4$  Hz, 1H), 2.35 (s, 3H).

**$^{13}\text{C}$  NMR (151 MHz,  $\text{CDCl}_3$ )  $\delta$  (ppm):** 168.5, 168.2, 157.3, 138.3, 136.8, 135.0, 134.3, 134.2, 134.1, 132.0, 131.4, 131.3, 130.5, 129.7, 129.0, 128.72, 128.70, 127.9, 127.7, 127.0, 125.6, 124.8, 124.4, 122.7, 118.8, 118.7, 116.3, 116.2, 96.6, 66.0, 40.8, 38.8, 20.2.

**HRMS (ESI – TOF)  $m/z$ :**  $[\text{M} + \text{Na}]^+$  calculated for  $\text{C}_{39}\text{H}_{29}\text{N}_3\text{O}_3\text{Na}^+$  610.2101, found 610.2106.

***N-((1R,2S)-2-benzyl-1-(naphthalen-2-yl)-3,8-dioxo-2,3-dihydro-1H,8H-3a,8a-diazabenz[e]acephenanthrylen-2-yl)benzamide-3k***

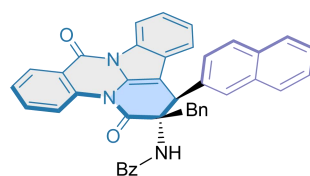

Prepared according to **General Procedure**, the crude product was purified by silica gel chromatography (petroleum ether/ethyl acetate 50:1 to 30:1) to afford **3k** (48.7 mg, 78% yield) as a yellow solid, m. p. = 182 – 184 °C, and the enantiomeric ratio of **3k** was determined to be 96:4 by chiral HPLC analysis on Chiralpak IC column (DCM/*n*-hexane/MeOH = 75:25:0.3, flow rate: 0.6 mL/min), UV 254 nm,  $t_R$  (major) = 10.99 min,  $t_R$  (minor) = 9.14 min;  $[\alpha]_D^{20} = -109.7$  ( $c = 0.76$  in  $\text{CH}_2\text{Cl}_2$ ).

*NMR and HRMS data for the product 3k:*

**$^1\text{H}$  NMR (600 MHz,  $\text{CDCl}_3$ )  $\delta$  (ppm):** 8.82 (d,  $J = 8.4$  Hz, 1H), 8.71 (d,  $J = 8.4$  Hz, 1H), 8.52 – 8.51 (m, 1H), 7.92 – 7.87 (m, 3H), 7.79 (d,  $J = 8.4$  Hz, 1H), 7.76–7.73 (m, 1H), 7.69 (d,  $J = 6.6$  Hz, 2H), 7.57 – 7.51 (m, 4H), 7.46 – 7.41 (m, 3H), 7.33 – 7.26 (m, 2H), 7.23 – 7.20 (m, 2H), 7.14 – 7.11 (m, 1H), 6.89 (d,  $J = 6.6$  Hz, 2H), 6.78 (d,  $J = 7.8$  Hz, 1H), 6.39 (s, 1H), 6.03 (s, 1H), 3.81 (d,  $J = 14.4$  Hz, 1H), 2.92 (d,  $J = 14.4$  Hz, 1H).

**<sup>13</sup>C NMR (151 MHz, CDCl<sub>3</sub>) δ (ppm):** 168.6, 168.2, 157.4, 137.0, 135.2, 134.5, 133.9, 133.2, 133.1, 132.1, 131.4, 131.3, 130.5, 130.4, 129.2, 128.94, 128.90, 128.6, 128.1, 128.0, 127.9, 127.8, 127.5, 127.1, 126.5, 125.0, 124.6, 123.0, 119.4, 118.8, 116.5, 116.4, 95.5, 66.1, 44.3, 38.6.

**HRMS (ESI – TOF) *m/z*:** [M + Na]<sup>+</sup> calculated for C<sub>42</sub>H<sub>29</sub>N<sub>3</sub>O<sub>3</sub>Na<sup>+</sup> 646.2101, found 646.2098.

***N-((1R,2S)-2-isobutyl-3,8-dioxo-1-phenyl-2,3-dihydro-1H,8H-3a,8a-diazabenz[e]acephenanthrylen-2-yl)benzamide-3l***

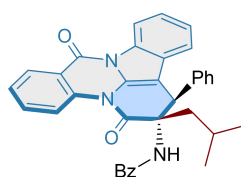

Prepared according to **General Procedure**, the crude product was purified by silica gel chromatography (petroleum ether/ethyl acetate 30:1 to 10:1) to afford **3l** (45.4 mg, 84% yield) as a yellow solid, m. p. = 180 – 182 °C, and the enantiomeric ratio of **3l** was determined to be 98:2 by chiral HPLC analysis on Chiralpak IA column (DCM/*n*-hexane/MeOH = 75:25:0.3, flow rate: 0.6 mL/min), UV 254 nm, *t<sub>R</sub>* (major) = 6.08 min, *t<sub>R</sub>* (minor) = 6.96 min; [α]<sub>D</sub><sup>20</sup> = -6.7 (*c* = 0.3 in CH<sub>2</sub>Cl<sub>2</sub>).

*NMR and HRMS data for the product 3l:*

**<sup>1</sup>H NMR (600 MHz, CDCl<sub>3</sub>) δ (ppm):** 9.03 (d, *J* = 9.0 Hz, 1H), 8.71 (d, *J* = 8.4 Hz, 1H), 8.51 (d, *J* = 7.8 Hz, 1H), 7.78 (d, *J* = 7.8 Hz, 2H), 7.76 – 7.73 (m, 1H), 7.55 (t, *J* = 7.8 Hz, 1H), 7.48 – 7.30 (m, 9H), 7.16 (t, *J* = 7.8 Hz, 1H), 6.70 (d, *J* = 7.2 Hz, 1H), 6.23 (s, 1H), 5.74 (s, 1H), 2.40 (dd, *J* = 15.0, 4.8 Hz, 1H), 1.80 – 1.77 (m, 1H), 1.26 – 1.21 (m, 1H), 1.01 (d, *J* = 6.0 Hz, 3H), 0.80 (d, *J* = 6.6 Hz, 3H).

**<sup>13</sup>C NMR (151 MHz, CDCl<sub>3</sub>) δ (ppm):** 168.2, 167.3, 157.3, 137.0, 135.2, 134.2, 132.0, 131.23, 131.21, 131.1, 129.1, 128.8, 128.11, 128.05, 127.4, 126.9, 124.9, 124.3, 122.7, 119.4, 118.8, 116.4, 116.3, 95.6, 65.6, 44.3, 41.0, 24.7, 24.4, 24.0.

**HRMS (ESI – TOF) *m/z*:** [M + Na]<sup>+</sup> calculated for C<sub>35</sub>H<sub>29</sub>N<sub>3</sub>O<sub>3</sub>Na<sup>+</sup> 562.2101, found 562.2106.

**N-((1R,2S)-2-((methylthio)methyl)-3,8-dioxo-1-phenyl-2,3-dihydro-1H,8H-3a,8a-diazabenzof[e]acephenanthrylen-2-yl)benzamide-3m**

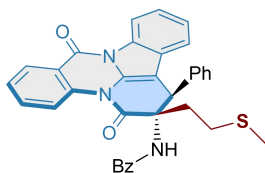

Prepared according to **General Procedure** at room temp., the crude product was purified by silica gel chromatography (petroleum ether/ethyl acetate 30:1 to 8:1) to afford **3m** (54.1 mg, 97% yield) as a yellow solid, m. p. = 165 – 167 °C, and the enantiomeric ratio of **3m** was determined to be 95:5 by chiral HPLC analysis on Chiralpak IC column (DCM/*n*-hexane/MeOH = 75:25:0.3, flow rate: 0.6 mL/min), UV 254 nm,  $t_R$  (major) = 12.00 min,  $t_R$  (minor) = 7.86 min;  $[\alpha]_D^{20}$  = -8.4 ( $c$  = 0.73 in CH<sub>2</sub>Cl<sub>2</sub>).

**NMR and HRMS data for the product 3m:**

**<sup>1</sup>H NMR (600 MHz, CDCl<sub>3</sub>) δ (ppm):** 8.98 (d,  $J$  = 9.0 Hz, 1H), 8.67 (d,  $J$  = 8.4 Hz, 1H), 8.47 (d,  $J$  = 7.8 Hz, 1H), 7.82 – 7.81 (m, 2H), 7.74 – 7.71 (m, 1H), 7.54 – 7.51 (m, 1H), 7.44 – 7.34 (m, 7H), 7.32 – 7.28 (m, 3H), 7.17 (t,  $J$  = 7.8 Hz, 1H), 6.79 (d,  $J$  = 7.8 Hz, 1H), 5.62 (s, 1H), 2.61 – 2.55 (m, 3H), 1.95 (s, 3H), 1.93 – 1.88 (m, 1H).

**<sup>13</sup>C NMR (151 MHz, CDCl<sub>3</sub>) δ (ppm):** 168.4, 167.8, 157.2, 137.0, 135.2, 135.1, 133.8, 132.0, 131.2, 131.1, 130.6, 129.0, 128.7, 128.3, 128.2, 127.24, 127.21, 124.9, 124.4, 122.8, 119.2, 118.8, 116.4, 116.3, 95.3, 65.7, 44.5, 30.5, 28.2, 15.6.

**<sup>19</sup>F NMR (564 MHz, CDCl<sub>3</sub>) δ (ppm):** -85.2 – -85.4 (m, 3F), -118.1 (t,  $J$  = 17.3 Hz, 2F).

**HRMS (ESI – TOF)  $m/z$ :**  $[M + Na]^+$  calculated for C<sub>34</sub>H<sub>27</sub>N<sub>3</sub>O<sub>3</sub>SNa<sup>+</sup> 580.1665, found 580.1669.

**N-((1R,2S)-2-((1H-indol-3-yl)methyl)-3,8-dioxo-1-phenyl-2,3-dihydro-1H,8H-3a,8a-diazabenzof[e]acephenanthrylen-2-yl)benzamide-3n**

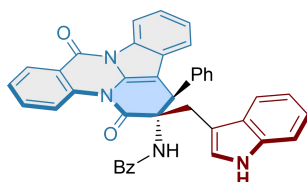

Prepared according to **General Procedure**, the crude product was purified by silica gel chromatography (petroleum ether/ethyl acetate 30:1 to 3:1) to afford **3n** (49.7 mg, 81% yield) as a yellow solid, m. p. = 223 – 226 °C, and the enantiomeric ratio of **3n** was determined to be



99:1 by chiral HPLC analysis on Chiralpak IC column (DCM/*n*-hexane/MeOH = 75:25:0.3, flow rate: 0.6 mL/min), UV 254 nm,  $t_R$  (major) = 13.60 min,  $t_R$  (minor) = 9.18 min;  $[\alpha]_D^{20} = -13.7$  ( $c = 0.9$  in  $\text{CH}_2\text{Cl}_2$ ).

*NMR and HRMS data for the product 3n:*

**$^1\text{H}$  NMR (600 MHz,  $\text{CDCl}_3$ )  $\delta$  (ppm):** 10.83 (s, 1H), 8.64 (s, 1H), 8.48 – 8.47 (m, 1H), 8.29 – 8.25 (m, 2H), 7.70 (t,  $J = 8.4$  Hz, 1H), 7.47 (d,  $J = 7.8$  Hz, 2H), 7.40 – 7.38 (m, 2H), 7.29 – 7.20 (m, 11H), 7.09 – 7.06 (m, 2H), 6.89 (t,  $J = 7.8$  Hz, 1H), 6.59 (t,  $J = 7.2$  Hz, 1H), 5.28 (s, 1H), 3.87 (d,  $J = 15.0$  Hz, 1H), 2.96 (d,  $J = 15.0$  Hz, 1H).

**$^{13}\text{C}$  NMR (151 MHz,  $\text{CDCl}_3$ )  $\delta$  (ppm):** 169.9, 167.5, 156.9, 137.1, 136.4, 135.6, 134.5, 133.9, 131.6, 131.2, 130.3, 129.6, 128.3, 128.2, 127.9, 127.5, 127.3, 124.5, 124.1, 123.8, 121.6, 120.6, 118.2, 118.0, 117.9, 117.6, 115.5, 115.3, 111.0, 107.3, 95.7, 64.5, 43.9, 40.1, 26.5.

**HRMS (ESI – TOF)  $m/z$ :**  $[\text{M} + \text{Na}]^+$  calculated for  $\text{C}_{40}\text{H}_{28}\text{N}_4\text{O}_3\text{Na}^+$  635.2054, found 635.2053.

***N-((1R,2S)-2-benzyl-3,8-dioxo-1-phenyl-2,3-dihydro-1H,8H-3a,8a-diazabenz[e]acephenanthrylen-2-yl)-4-chlorobenzamide-3o***

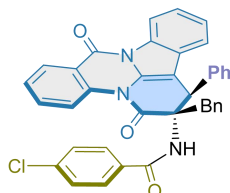

Prepared according to **General Procedure**, the crude product was purified by silica gel chromatography (petroleum ether/ethyl acetate 30:1 to 10:1) to afford **3o** (42.6 mg, 70% yield) as a yellow solid, m. p. = 216 – 219 °C, and the enantiomeric ratio of **3o** was determined to be 91:9 by chiral HPLC analysis on Chiralpak IA column ( $\text{CO}_2$ /*i*-PrOH = 60:40, flow rate: 1.5 mL/min), UV 270 nm,  $t_R$  (major) = 13.00 min,  $t_R$  (minor) = 15.42 min;  $[\alpha]_D^{20} = -62.6$  ( $c = 0.20$  in  $\text{CH}_2\text{Cl}_2$ ).

*NMR and HRMS data for the product 3o:*

**$^1\text{H}$  NMR (600 MHz,  $\text{CDCl}_3$ )  $\delta$  (ppm):** 8.79 (d,  $J = 9.0$  Hz, 1H), 8.68 (d,  $J = 7.8$  Hz, 1H), 8.50 (d,  $J = 7.8$  Hz, 1H), 7.72 (t,  $J = 7.8$  Hz, 1H), 7.57 (d,  $J = 8.4$  Hz, 2H), 7.45-7.36 (m, 7H), 7.32-7.17 (m, 6H), 6.89 (d,  $J = 7.8$  Hz, 2H), 6.79 (d,  $J = 7.2$  Hz, 1H), 6.27 (s, 1H), 5.76 (s, 1H), 3.70 (d,  $J = 14.4$  Hz, 1H), 2.91 (d,  $J = 14.4$  Hz, 1H).

**<sup>13</sup>C NMR (151 MHz, CDCl<sub>3</sub>) δ (ppm):** 168.1, 167.3, 157.2, 138.3, 136.8, 135.3, 135.1, 133.8, 132.6, 131.2, 131.0, 130.9, 130.3, 129.1, 129.0, 128.8, 128.41, 128.39, 128.3, 128.0, 127.3, 124.9, 124.4, 122.9, 119.2, 118.6, 116.4, 116.3, 95.4, 65.7, 44.1, 38.2.

**HRMS (ESI – TOF) *m/z*:** [M + Na]<sup>+</sup> calculated for C<sub>38</sub>H<sub>26</sub><sup>35</sup>ClN<sub>3</sub>O<sub>3</sub>Na<sup>+</sup> 630.1555, found 630.1545; calculated for C<sub>38</sub>H<sub>26</sub><sup>37</sup>ClN<sub>3</sub>O<sub>3</sub>Na<sup>+</sup> 632.1525, found 632.1519.

***N-((1R,2S)-2-benzyl-3,8-dioxo-1-phenyl-2,3-dihydro-1H,8H-3a,8a-diazabenzof[e]acephenanthrylen-2-yl)-4-bromobenzamide-3p***

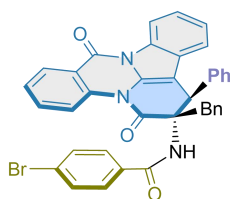

Prepared according to **General Procedure**, the crude product was purified by silica gel chromatography (petroleum ether/ethyl acetate 30:1 to 10:1) to afford **3p** (48.3 mg, 74% yield) as a yellow solid, m. p. = 171 – 174 °C, and the enantiomeric ratio of **3o** was determined to be 97:3 by chiral HPLC analysis on Chiralpak IA column (CO<sub>2</sub>/*i*-PrOH = 60:40, flow rate: 1.5 mL/min), UV 270 nm, *t<sub>R</sub>* (major) = 15.79 min, *t<sub>R</sub>* (minor) = 19.10 min; [α]<sub>D</sub><sup>20</sup> = -68.2 (*c* = 0.10 in CH<sub>2</sub>Cl<sub>2</sub>).

*NMR and HRMS data for the product 3p:*

**<sup>1</sup>H NMR (600 MHz, CDCl<sub>3</sub>) δ (ppm):** 8.79 (d, *J* = 8.4 Hz, 1H), 8.68 (d, *J* = 8.4 Hz, 1H), 8.49 (d, *J* = 7.8 Hz, 1H), 7.73 (t, *J* = 7.8 Hz, 1H), 7.55-7.50 (m, 4H), 7.45 – 7.39 (m, 5H), 7.30 – 7.16 (m, 6H), 6.90 (d, *J* = 6.6 Hz, 2H), 6.79 (d, *J* = 7.8 Hz, 1H), 6.31 (s, 1H), 5.76 (s, 1H), 3.71 (d, *J* = 14.4 Hz, 1H), 2.92 (d, *J* = 14.4 Hz, 1H).

**<sup>13</sup>C NMR (151 MHz, CDCl<sub>3</sub>) δ (ppm):** 168.1, 167.4, 157.2, 136.8, 135.3, 135.1, 133.8, 133.1, 132.0, 131.3, 131.0, 130.9, 130.3, 129.1, 128.8, 128.6, 128.4, 128.3, 128.0, 127.3, 126.8, 124.9, 124.4, 122.9, 119.2, 118.6, 116.4, 116.3, 95.4, 65.7, 44.1, 38.2.

**HRMS (ESI – TOF) *m/z*:** [M + Na]<sup>+</sup> calculated for C<sub>38</sub>H<sub>26</sub>Br<sup>79</sup>N<sub>3</sub>O<sub>3</sub>Na<sup>+</sup> 674.1050, found 674.1043; calculated for C<sub>38</sub>H<sub>26</sub>Br<sup>81</sup>N<sub>3</sub>O<sub>3</sub>Na<sup>+</sup> 676.1029, found 676.1021.

*N-((1R,2S)-2-benzyl-3,8-dioxo-1-phenyl-2,3-dihydro-1H,8H-3a,8a-diazabenzof[e]acephenanthrylen-2-yl)-3-methylbenzamide-3q*

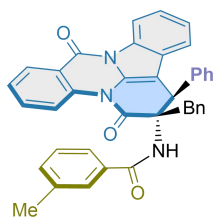

Prepared according to **General Procedure**, the crude product was purified by silica gel chromatography (petroleum ether/ethyl acetate 30:1 to 10:1) to afford **3q** (39.4 mg, 67% yield) as a yellow solid, m. p. = 161 – 165 °C, and the enantiomeric ratio of **3o** was determined to be 92:8 by chiral HPLC analysis on Chiralpak IC column (DCM/*n*-hexane/MeOH = 75:25:0.3, flow rate: 0.6 mL/min), UV 254 nm,  $t_R$  (major) = 13.40 min,  $t_R$  (minor) = 9.56 min;  $[\alpha]_D^{20} = -130.2$  ( $c = 0.79$  in  $\text{CH}_2\text{Cl}_2$ ).

*NMR and HRMS data for the product 3q:*

**$^1\text{H}$  NMR (600 MHz,  $\text{CDCl}_3$ )  $\delta$  (ppm):** 8.81 (d,  $J = 9.0$  Hz, 1H), 8.69 (d,  $J = 8.4$  Hz, 1H), 8.51 – 8.50 (m, 1H), 7.75 – 7.72 (m, 1H), 7.46 – 7.38 (m, 8H), 7.33 – 7.27 (m, 4H), 7.25 – 7.18 (m, 3H), 6.92 (d,  $J = 6.6$  Hz, 2H), 6.84 (d,  $J = 7.8$  Hz, 1H), 6.31 (s, 1H), 5.73 (s, 1H), 3.73 (d,  $J = 14.4$  Hz, 1H), 2.92 (d,  $J = 14.4$  Hz, 1H), 2.36 (s, 3H).

**$^{13}\text{C}$  NMR (151 MHz,  $\text{CDCl}_3$ )  $\delta$  (ppm):** 168.5, 168.3, 157.3, 138.6, 136.8, 135.5, 135.1, 134.2, 134.0, 132.7, 131.2, 131.1, 130.9, 130.4, 129.0, 128.8, 128.6, 128.4, 128.2, 127.8, 127.3, 124.8, 124.4, 123.9, 122.8, 119.2, 118.6, 116.4, 116.2, 95.5, 65.6, 44.2, 38.2, 21.3.

**HRMS (ESI – TOF)  $m/z$ :**  $[\text{M} + \text{Na}]^+$  calculated for  $\text{C}_{39}\text{H}_{29}\text{N}_3\text{O}_3\text{Na}^+$  610.2101, found 610.2102.

*N-((1R,2S)-2-benzyl-3,8-dioxo-1-phenyl-2,3-dihydro-1H,8H-3a,8a-diazabenzof[e]acephenanthrylen-2-yl)-2-bromobenzamide-3r*

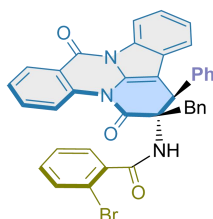

Prepared according to **General Procedure**, the crude product was purified by silica gel chromatography (petroleum ether/ethyl acetate 30:1 to 10:1) to afford **3r** (42.4 mg, 65% yield) as a yellow solid, m. p. = 148 – 151 °C, and the enantiomeric ratio of **3r** was determined to be

98:2 by chiral HPLC analysis on Chiralpak IA column (CO<sub>2</sub>/*i*-PrOH = 60:40, flow rate: 1.5 mL/min), UV 254 nm, *t<sub>R</sub>* (major) = 13.86 min, *t<sub>R</sub>* (minor) = 12.49 min; [ $\alpha$ ]<sub>D</sub><sup>20</sup> = -38.77 (*c* = 0.57 in CH<sub>2</sub>Cl<sub>2</sub>).

*NMR and HRMS data for the product 3r:*

**<sup>1</sup>H NMR (600 MHz, CDCl<sub>3</sub>)  $\delta$  (ppm):** 8.83 (d, *J* = 8.4 Hz, 1H), 8.66 (d, *J* = 7.8 Hz, 1H), 8.49 (d, *J* = 7.2 Hz, 1H), 7.78 (t, *J* = 7.2 Hz, 1H), 7.49 – 7.42 (m, 8H), 7.31 – 7.23 (m, 7H), 7.04 – 6.98 (m, 3H), 6.34 (s, 1H), 5.33 (s, 1H), 3.91 (d, *J* = 14.4 Hz, 1H), 3.00 (d, *J* = 14.4 Hz, 1H).

**<sup>13</sup>C NMR (151 MHz, CDCl<sub>3</sub>)  $\delta$  (ppm):** 168.5, 167.7, 157.3, 137.0, 136.9, 136.0, 135.1, 134.6, 133.6, 131.6, 131.4, 131.2, 130.7, 130.5, 129.7, 129.0, 128.6, 128.5, 128.3, 127.6, 127.5, 127.4, 124.7, 124.5, 122.8, 119.2, 118.5, 118.4, 116.4, 116.3, 95.8, 65.8, 45.1, 37.4.

**HRMS (ESI – TOF) *m/z*:** [M + Na]<sup>+</sup> calculated for C<sub>38</sub>H<sub>26</sub>Br<sup>79</sup>N<sub>3</sub>O<sub>3</sub>H<sup>+</sup> 652.1230, found 652.1227; calculated for C<sub>38</sub>H<sub>26</sub>Br<sup>81</sup>N<sub>3</sub>O<sub>3</sub>H<sup>+</sup> 654.1210, found 654.1201.

***N-((1R,2S)-2-benzyl-3,8-dioxo-1-phenyl-2,3-dihydro-1H,8H-3a,8a-diazabenzof[e]acephenanthrylen-2-yl)-2-naphthamide-3s***

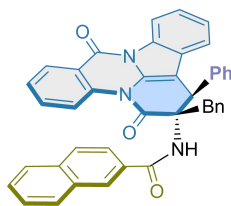

Prepared according to **General Procedure**, the crude product was purified by silica gel chromatography (petroleum ether/ethyl acetate 30:1 to 10:1) to afford **3s** (51.2 mg, 82% yield) as a yellow solid, m. p. = 200 – 203 °C, and the enantiomeric ratio of **3s** was determined to be 99:1 by chiral HPLC analysis on Chiralpak IA column (CO<sub>2</sub>/*i*-PrOH = 60:40, flow rate: 1.5 mL/min), UV 270 nm, *t<sub>R</sub>* (major) = 15.87 min, *t<sub>R</sub>* (minor) = 14.13 min; [ $\alpha$ ]<sub>D</sub><sup>20</sup> = -227.0 (*c* = 0.35 in CH<sub>2</sub>Cl<sub>2</sub>).

*NMR and HRMS data for the product 3s:*

**<sup>1</sup>H NMR (600 MHz, CDCl<sub>3</sub>)  $\delta$  (ppm):** 8.81 (d, *J* = 8.4 Hz, 1H), 8.67 (d, *J* = 8.4 Hz, 1H), 8.48 – 8.46 (m, 1H), 8.13 (s, 1H), 7.85 – 7.83 (m, 3H), 7.74 – 7.69 (m, 2H), 7.57 – 7.50 (m, 2H), 7.44 – 7.40 (m, 6H), 7.32 – 7.23 (m, 4H), 7.19 (t, *J* = 7.2 Hz, 1H), 6.96 (d, *J* = 7.2 Hz, 2H), 6.83 (d, *J* = 8.4 Hz, 1H), 6.55 (s, 1H), 5.81 (s, 1H), 3.75 (d, *J* = 14.4 Hz, 1H), 2.97 (d, *J* = 14.4 Hz, 1H).

**<sup>13</sup>C NMR (151 MHz, CDCl<sub>3</sub>)  $\delta$  (ppm):** 168.4, 168.3, 157.2, 136.8, 135.5, 135.0, 134.9, 134.0, 132.5, 131.5, 131.2, 131.1, 130.9, 130.4, 129.0, 128.9, 128.8, 128.6, 128.4, 128.2,

127.9, 127.7, 127.3, 126.8, 124.8, 124.4, 123.4, 122.8, 119.1, 118.6, 116.3, 116.2, 95.5, 65.7, 44.2, 38.2.

**HRMS (ESI – TOF)  $m/z$ :**  $[M + Na]^+$  calculated for  $C_{42}H_{29}N_3O_3Na^+$  646.2101, found 646.2110.

***N-((1R,2S)-2-benzyl-3,8-dioxo-1-phenyl-2,3-dihydro-1H,8H-3a,8a-diazabenzof[e]acephenanthrylen-2-yl)furan-2-carboxamide-3t***

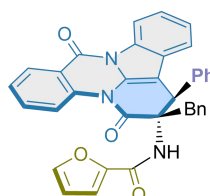

Prepared according to **General Procedure**, the crude product was purified by silica gel chromatography (petroleum ether/ethyl acetate 30:1 to 8:1) to afford **3t** (35.0 mg, 62% yield) as a yellow solid, m. p. = 229 – 235 °C, and the enantiomeric ratio of **3t** was determined to be 95:5 by chiral HPLC analysis on Chiralpak IG column ( $CO_2/i\text{-}PrOH = 50:50$ , flow rate: 1.5 mL/min), UV 270 nm,  $t_R$  (major) = 15.70 min,  $t_R$  (minor) = 14.02 min;  $[\alpha]_D^{20} = -24.5$  ( $c = 0.16$  in  $CH_2Cl_2$ ).

*NMR and HRMS data for the product 3t:*

**$^1H$  NMR (600 MHz,  $CDCl_3$ )  $\delta$  (ppm):** 8.74 – 8.70 (m, 2H), 8.52 (d,  $J = 7.8$  Hz, 1H), 7.71 (t,  $J = 7.8$  Hz, 1H), 7.46 – 7.40 (m, 7H), 7.32 (t,  $J = 7.8$  Hz, 1H), 7.28 – 7.15 (m, 5H), 6.94 (d,  $J = 7.8$  Hz, 2H), 6.82 (d,  $J = 8.4$  Hz, 1H), 6.62 (s, 1H), 6.51 – 6.51 (m, 1H), 5.66 (s, 1H), 3.72 (d,  $J = 14.4$  Hz, 1H), 2.87 (d,  $J = 14.4$  Hz, 1H).

**$^{13}C$  NMR (151 MHz,  $CDCl_3$ )  $\delta$  (ppm):** 168.0, 158.8, 157.3, 147.4, 144.4, 136.7, 135.3, 135.1, 133.8, 131.2, 131.0, 130.8, 130.3, 129.0, 128.7, 128.4, 128.2, 127.8, 127.3, 124.9, 124.4, 122.8, 119.2, 118.7, 116.3, 116.2, 115.4, 112.3, 95.5, 65.5, 44.5, 38.3.

**HRMS (ESI – TOF)  $m/z$ :**  $[M + Na]^+$  calculated for  $C_{36}H_{25}N_3O_4Na^+$  586.1737, found 586.1742.

## 5. Mechanism experiments.

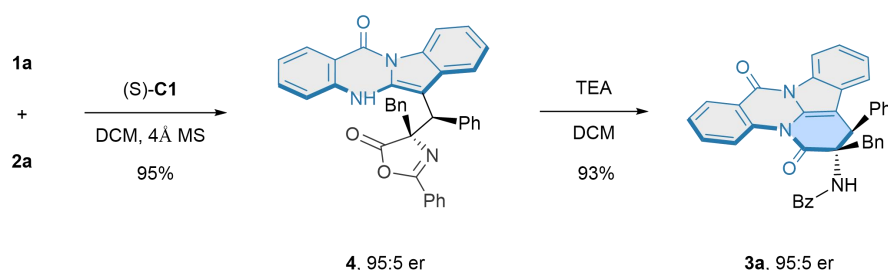

To an over-dried Schlenk tube was added substrates **1a** (0.10 mmol), (S)-**C1** (10 mol %), 4Å MS (50 mg) and substrates **2a** (0.15 mmol) in dry DCM (1 mL), and the reaction mixture was stirred at room temperature for 8 hours, and monitored by TLC. After the reaction finished, the mixture were concentrated in vacuum, and purified by column chromatography on silica gel (petroleum ether/ethyl acetate = 50/1 to 20:1) to afford the aza-Michael addition product **5** in 95% yield with 95:5 er. Then the product **5** were treated with 0.3 ml of TEA in 1.0 mL DCM for 0.5 h. And the mixture were concentrated in vacuum, and purified by column chromatography to afford the corresponding product **3** in 93% yield with 95:5 er.

**(S)-4-benzyl-4-((R)-(12-oxo-5,12-dihydroindolo[2,1-b]quinazolin-6-yl)(phenyl)methyl)-2-phenyloxazol-5(4H)-one-5**

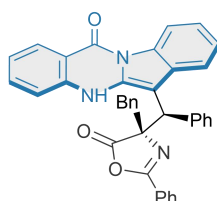

Prepared according to *General Procedure* to afford **5** (54.5 mg, 95% yield) as a yellow solid, m. p. = 191 – 195 °C, and the enantiomeric ratio of **5** was determined to be 95:5 by chiral HPLC analysis on Chiralpak IA column (CO<sub>2</sub>/i-PrOH = 60:40, flow rate: 1.5 mL/min), UV 270 nm,  $t_R$  (major) = 9.47 min,  $t_R$  (minor) = 10.78 min;  $[\alpha]_D^{20} = -163.4$  ( $c = 0.50$  in CH<sub>2</sub>Cl<sub>2</sub>).

*NMR and HRMS data for the product 5:*

**<sup>1</sup>H NMR (600 MHz, CDCl<sub>3</sub>) δ (ppm):** 8.83 (d,  $J = 8.4$  Hz, 1H), 8.47-8.46 (m, 1H), 7.80 – 7.77 (m, 1H), 7.71 (d,  $J = 8.4$  Hz, 2H), 7.61 – 7.58 (m, 1H), 7.53 (d,  $J = 7.8$  Hz, 1H), 7.48 (t,  $J = 7.8$  Hz, 2H), 7.40 – 7.37 (m, 2H), 7.31 – 7.26 (m, 4H), 7.17 – 7.03 (m, 8H), 5.04 (s, 1H), 3.54 (d,  $J = 13.8$  Hz, 1H), 3.38 (d,  $J = 13.8$  Hz, 1H).

**<sup>13</sup>C NMR (151 MHz, CDCl<sub>3</sub>) δ (ppm):** 177.4, 161.7, 159.5, 140.3, 138.0, 134.9, 133.8, 133.5, 133.3, 130.5, 129.9, 129.8, 129.1, 129.0, 128.9, 128.4, 128.3, 127.7, 127.6, 127.4, 124.6, 124.4, 121.1, 120.8, 116.2, 115.6, 114.3, 112.7, 91.0, 49.5, 42.4.

**HRMS (ESI – TOF)  $m/z$ :**  $[\text{M} + \text{Na}]^+$  calculated for C<sub>38</sub>H<sub>27</sub>N<sub>3</sub>O<sub>3</sub>Na<sup>+</sup> 596.1945, found 596.1950.

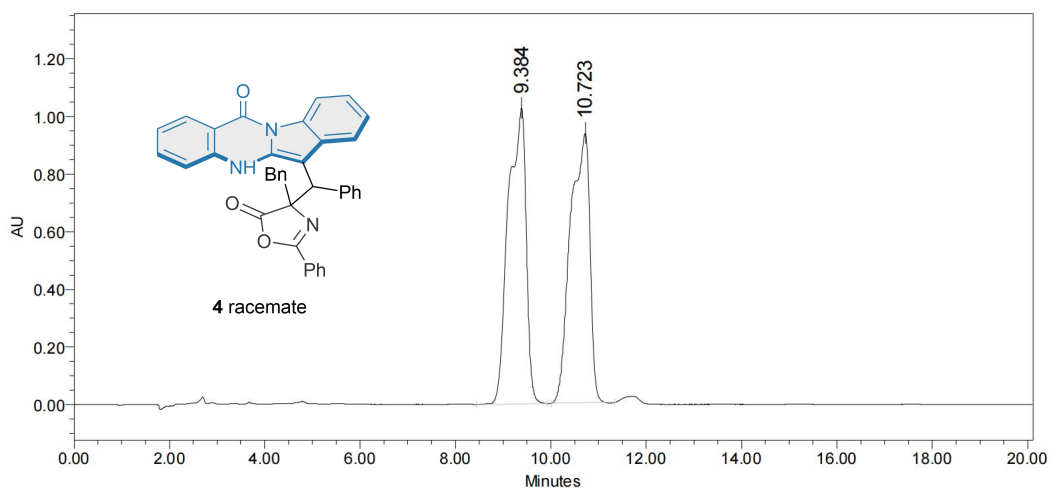

|   | Ret.Time(min) | Height( $\mu$ V) | Area( $\mu$ V*sec) | Rel.Area(%) |
|---|---------------|------------------|--------------------|-------------|
| 1 | 9.384         | 1026085          | 26753427           | 50.12       |
| 2 | 10.723        | 935804           | 26626685           | 49.88       |

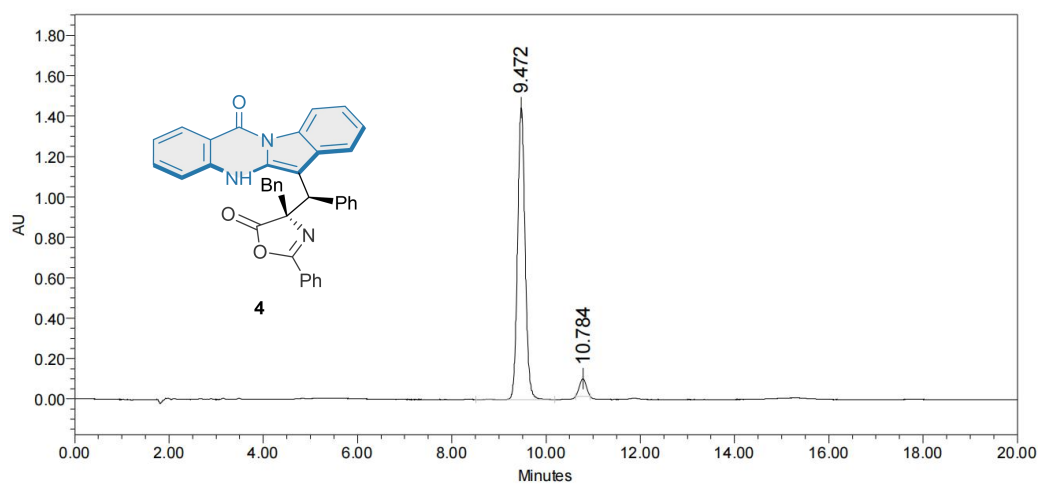

|   | Ret.Time(min) | Height( $\mu$ V) | Area( $\mu$ V*sec) | Rel.Area(%) |
|---|---------------|------------------|--------------------|-------------|
| 1 | 9.472         | 1444242          | 15940483           | 94.82       |
| 2 | 10.784        | 87387            | 870225             | 5.18        |

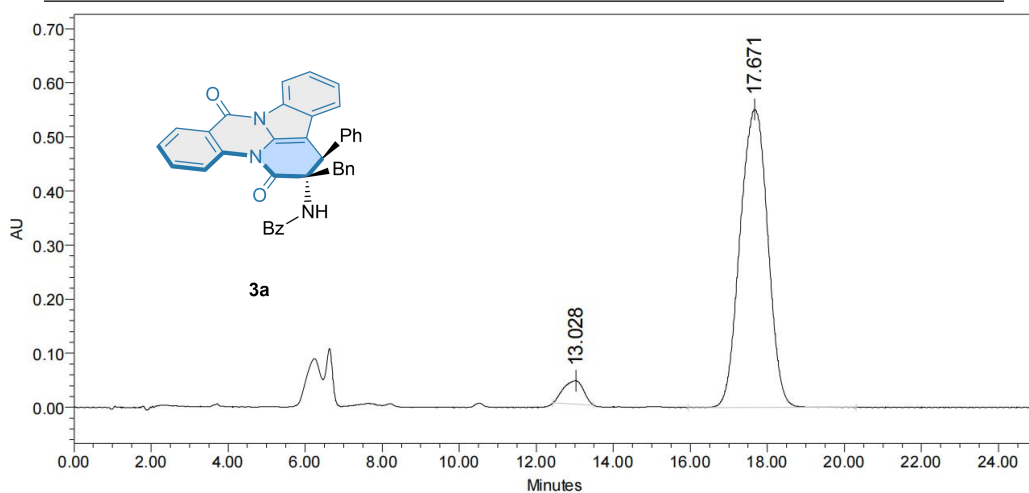

|   | Ret.Time(min) | Height( $\mu$ V) | Area( $\mu$ V*sec) | Rel.Area(%) |
|---|---------------|------------------|--------------------|-------------|
| 1 | 13.028        | 43154            | 1562636            | 5.35        |
| 2 | 17.671        | 550812           | 27664239           | 94.65       |

## 6. Crystal Data and Structure Refinement for 3a

### *Crystal preparation and measurement*

To a 10 mL tube containing **3a** (98 mg) was added a 15:1 mixture of petroleum ether and ethyl acetate (about 3 mL). The mixture was kept aside for 2 days at room temperature to obtain crystals. The crystals were subjected for single crystal XRD to determine the structure of **14b**. The data were collected by an Agilent Gemini equipped with a Cu radiation source ( $K_{\alpha} = 1.54184 \text{ \AA}$ ) at 296.6 K. CCDC 2304757 (**3a**) contains the supplementary crystallographic data for this paper.

### *Crystal Data (at 50% probability level)*

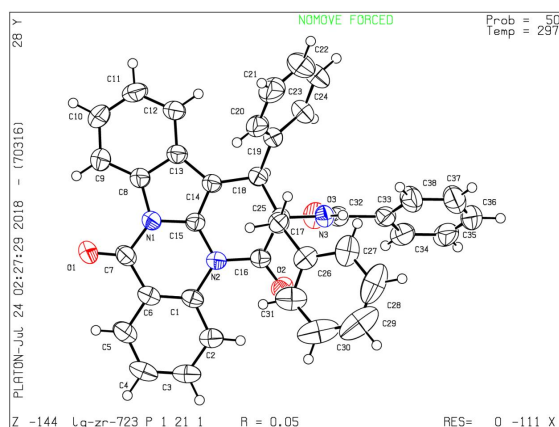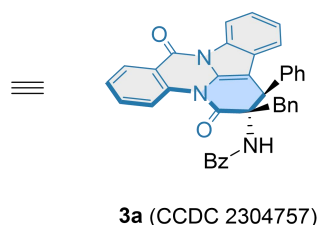

|                     |                      |
|---------------------|----------------------|
| Identification code | <b>3a</b>            |
| Empirical formula   | $C_{38}H_{27}N_3O_3$ |
| Formula weight      | 573.62               |
| Temperature/K       | 296.6(2)             |
| Crystal system      | monoclinic           |
| Space group         | $P2_1$               |
| a/ $\text{\AA}$     | 12.3693(6)           |
| b/ $\text{\AA}$     | 7.9290(4)            |
| c/ $\text{\AA}$     | 16.3345(8)           |
| $\alpha/^\circ$     | 90                   |
| $\beta/^\circ$      | 110.272(6)           |
| $\gamma/^\circ$     | 90                   |



|                                             |                                                               |
|---------------------------------------------|---------------------------------------------------------------|
| Volume/Å <sup>3</sup>                       | 1502.80(14)                                                   |
| Z                                           | 2                                                             |
| ρ <sub>calc</sub> /cm <sup>3</sup>          | 1.268                                                         |
| μ/mm <sup>-1</sup>                          | 0.647                                                         |
| F(000)                                      | 600.0                                                         |
| Crystal size/mm <sup>3</sup>                | 0.65 × 0.3 × 0.15                                             |
| Radiation                                   | CuKα (λ = 1.54184)                                            |
| 2Θ range for data collection/°              | 7.62 to 145.912                                               |
| Index ranges                                | -15 ≤ h ≤ 14, -9 ≤ k ≤ 8, -20 ≤ l ≤ 14                        |
| Reflections collected                       | 15153                                                         |
| Independent reflections                     | 5237 [R <sub>int</sub> = 0.0342, R <sub>sigma</sub> = 0.0325] |
| Data/restraints/parameters                  | 5237/1/397                                                    |
| Goodness-of-fit on F <sup>2</sup>           | 1.029                                                         |
| Final R indexes [I ≥ 2σ (I)]                | R <sub>1</sub> = 0.0497, wR <sub>2</sub> = 0.1299             |
| Final R indexes [all data]                  | R <sub>1</sub> = 0.0548, wR <sub>2</sub> = 0.1361             |
| Largest diff. peak/hole / e Å <sup>-3</sup> | 0.22/-0.26                                                    |
| Flack parameter                             | -0.03(15)                                                     |

## 7. References and Notes

- 1 E. Krell, *Handbook of Laboratory Distillation*, Elsevier Publishing Company, Amsterdam-London-New York, 1963.
- 2 M. J. Rosengart, *The Technique of Distillation and Rectification in the Laboratory*, VEB Verlag Technik, Berlin, 1954.
- 3 F. Stage, Die kolonnen zur laboratoriumsdestillation. eine ubersicht über den entwicklungsstand der kolonnen zur destillation im laboratorium, *Angew. Chem.* 1947, **19**, 175–183.
- 4 (a) D. Gahtory, M. Chouhan, R. Sharma, and V. A. Nair, Total synthesis of a pyrroloindoloquinazoline alkaloid, *Org. Lett.*, 2013, **15**, 3942–3945; (b) B. Rai, R. D. Shukla and A. Kumar, Zinc oxide-NP catalyzed direct indolation of in situ generated bioactive tryptanthrin, *Green Chem.*, 2018, **20**, 822–826; (c) J. Du, P. Liu, Y. Zhu, G. Wang, S. Xing, T. Liu, J. Xia, S. Dong, N. Lv and Z. Li, Novel tryptanthrin derivatives with benzenesulfonamide substituents: design, synthesis, and anti-inflammatory evaluation, *Eur. J. Med. Chem.*, 2023, **246**, 114956.
- 5 (a) E. Badiola, B. Fiser, E. Gómez-Bengoa, A. Mielgo, I. Olaizola, I. Urruzuno, J. M. García, J. M. Odriozola, J. Razkin, M. Oiarbide and C. Palomo, Enantioselective construction of tetrasubstituted stereogenic carbons through brønsted base catalyzed michael reactions:  $\alpha$ -hydroxy enones as key enoate equivalent, *J. Am. Chem. Soc.*, 2014, **136**, 17869–17881; (b) S. He, H. Gu, Y. He, and X. Yang, Asymmetric Aza-Diels-Alder reactions of in situ generated  $\beta,\beta$ -disubstituted  $\alpha,\beta$ -unsaturated N–H ketimines catalyzed by chiral phosphoric acids, *Org. Lett.*, 2020, **22**, 5633–5639; (c) Q. Ni, X. Wang, F. Xu, X. Chen and X. Song, Organocatalytic asymmetric [4+2] cyclization of 2-benzothiazolimines with azlactones: access to chiral benzothiazolopyrimidine derivatives, *Chem. Commun.*, 2020, **56**, 3155–3158.
- 6 E. S. Lee, J.-G. Park and Y. Jahng, A facile synthesis of simple alkaloids—synthesis of 2,3-polymethylene-4(3H)-quinazolinones and related alkaloids. *Tetrahedron Lett.*, 2003, **44**, 1883–1886.

## 8. Copies of $^1\text{H}$ , $^{13}\text{C}$ NMR, HPLC Spectra

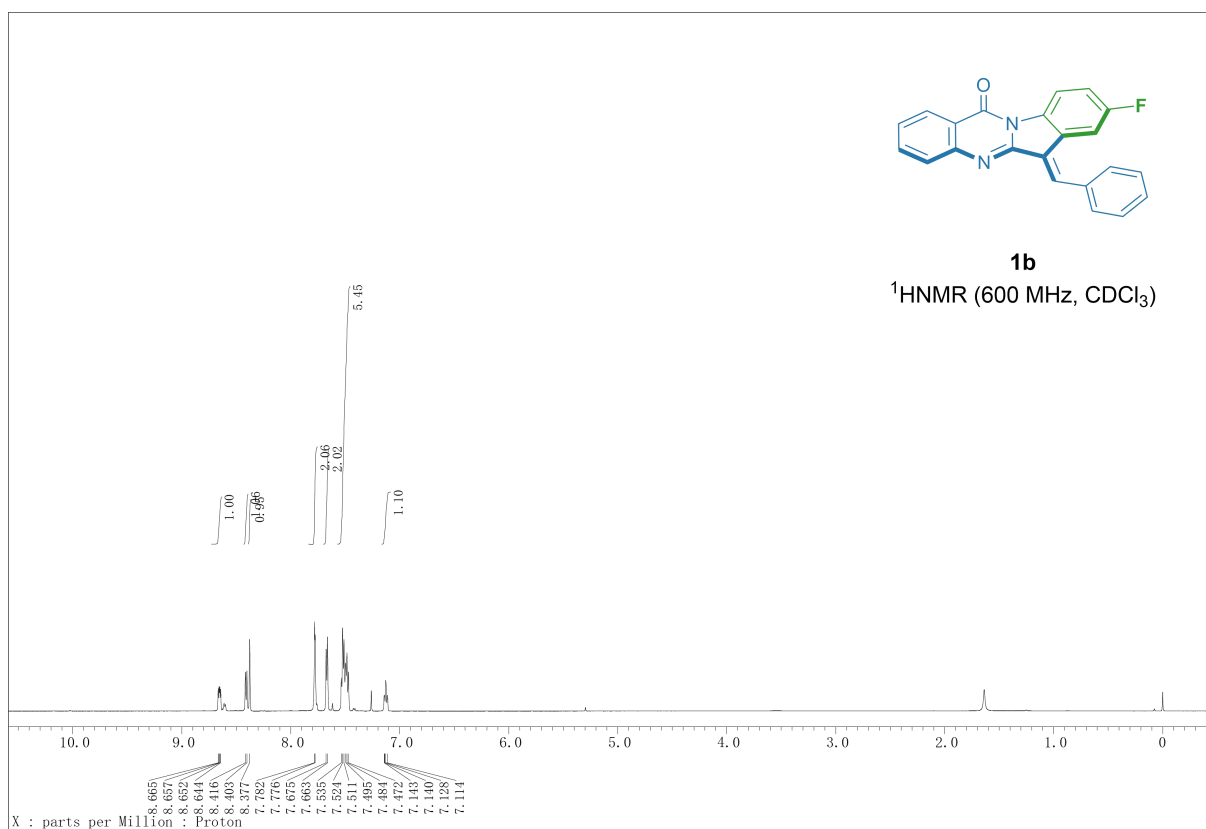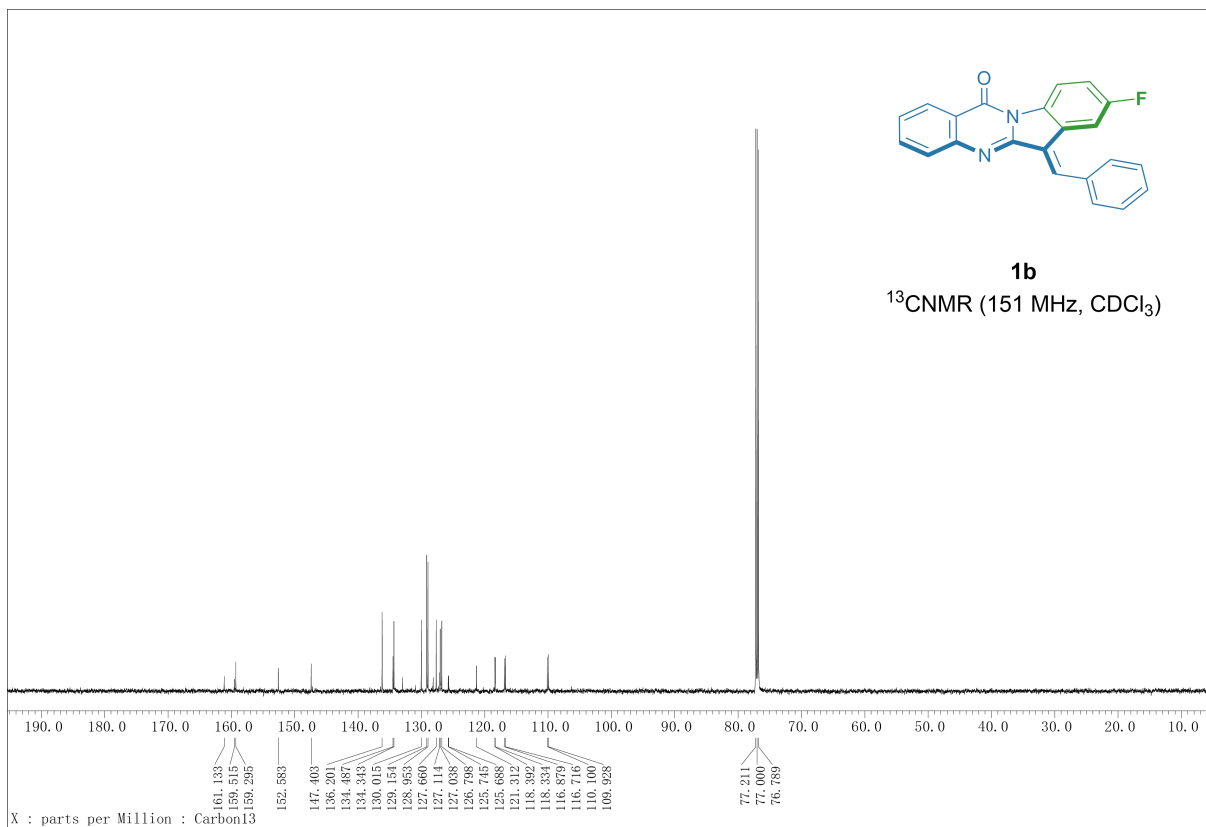

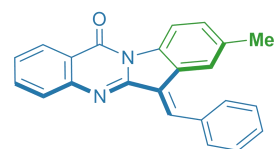

**1c**

$^1\text{H}$ NMR (600 MHz,  $\text{CDCl}_3$ )

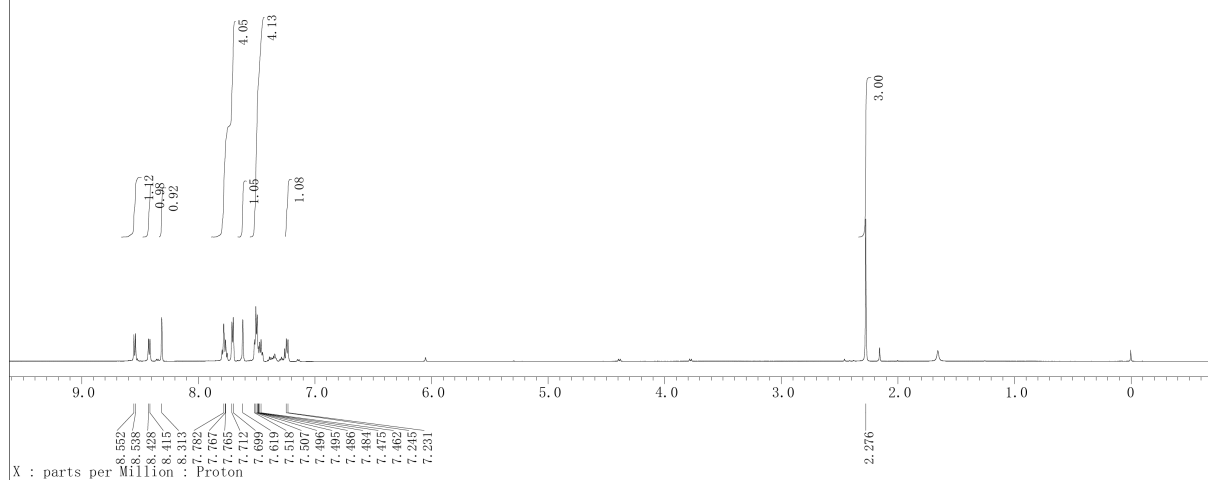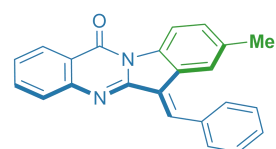

**1c**

$^{13}\text{C}$ NMR (151 MHz,  $\text{CDCl}_3$ )

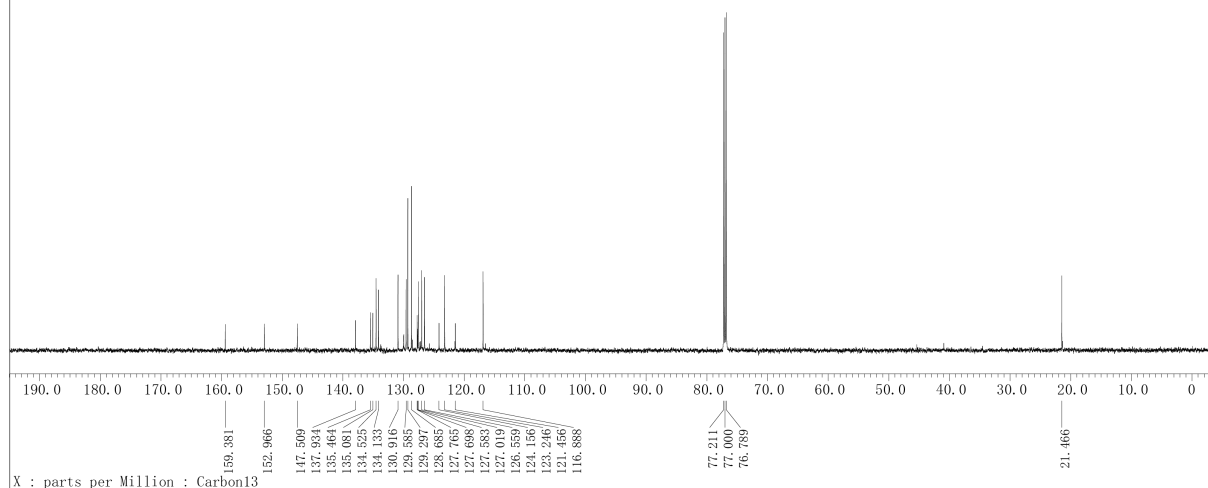

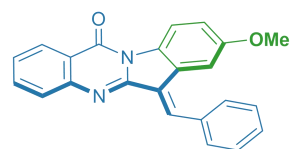

**1d**

$^1\text{H}$ NMR (600 MHz,  $\text{CDCl}_3$ )

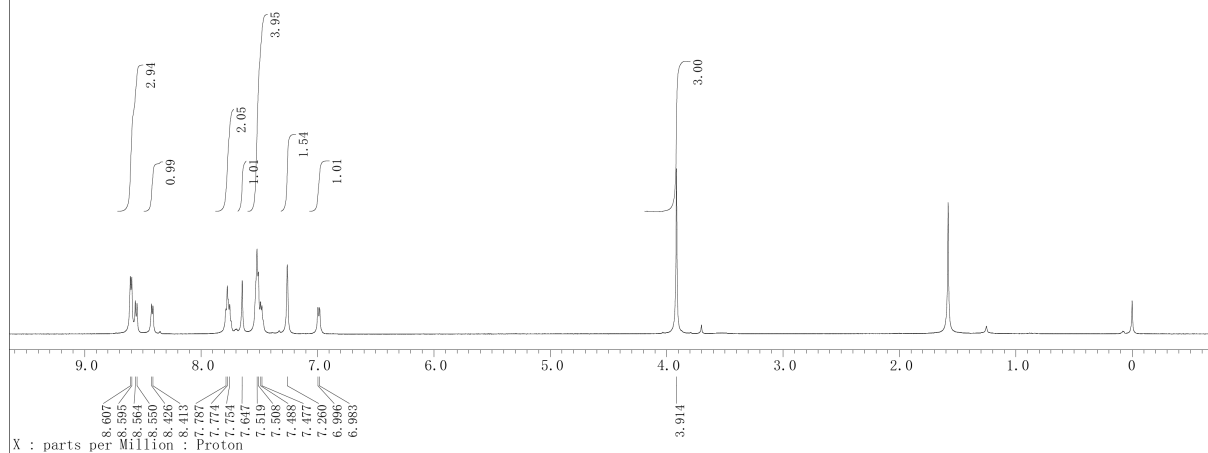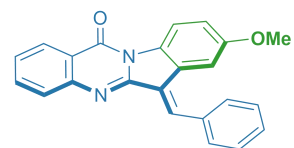

**1d**

$^{13}\text{C}$ NMR (151 MHz,  $\text{CDCl}_3$ )

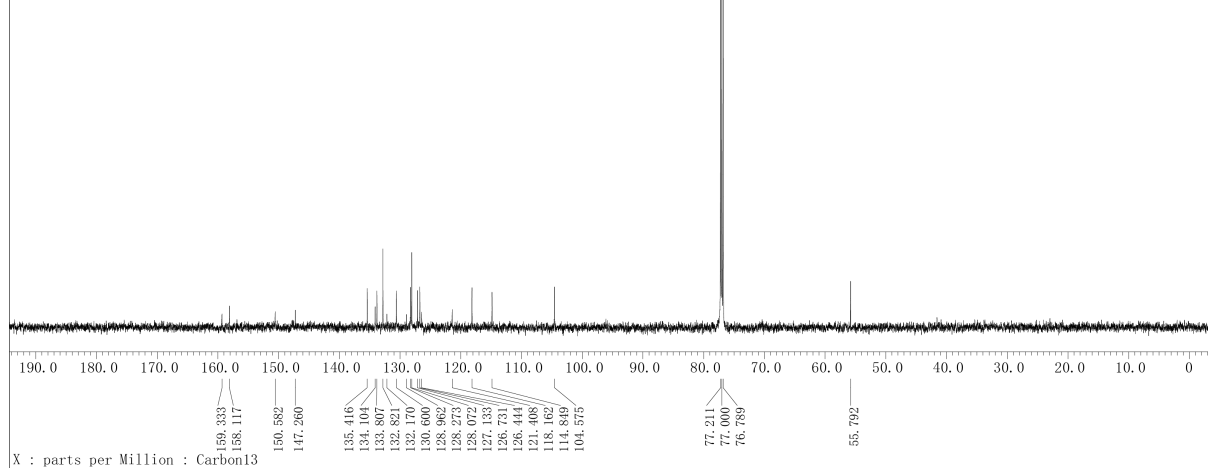

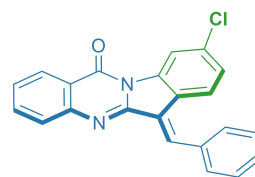

**1e**

$^1\text{H}$ NMR (600 MHz,  $\text{CDCl}_3$ )

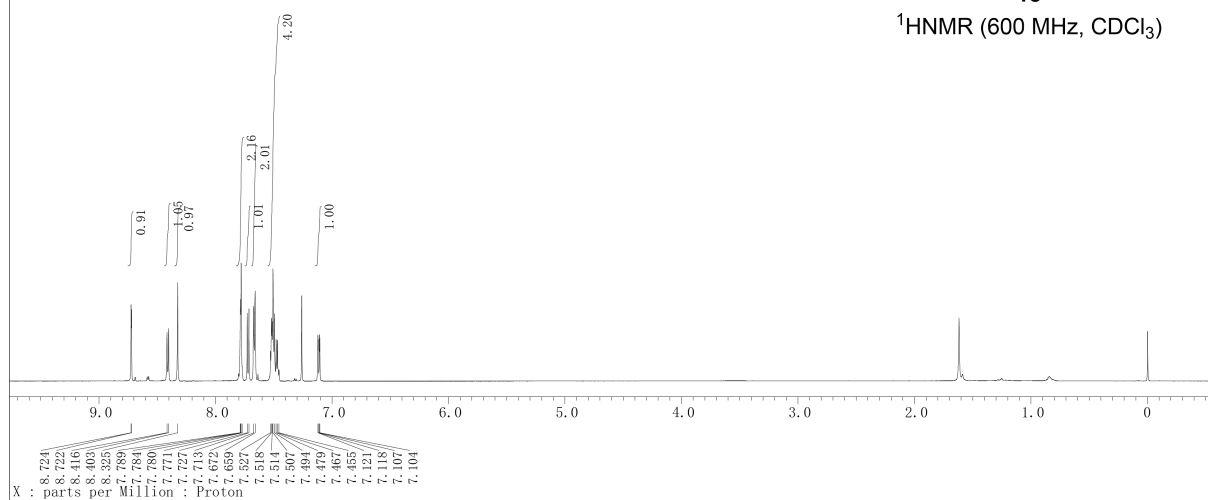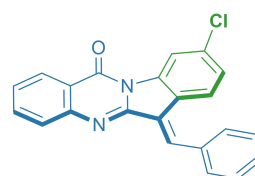

**1e**

$^{13}\text{C}$ NMR (151 MHz,  $\text{CDCl}_3$ )

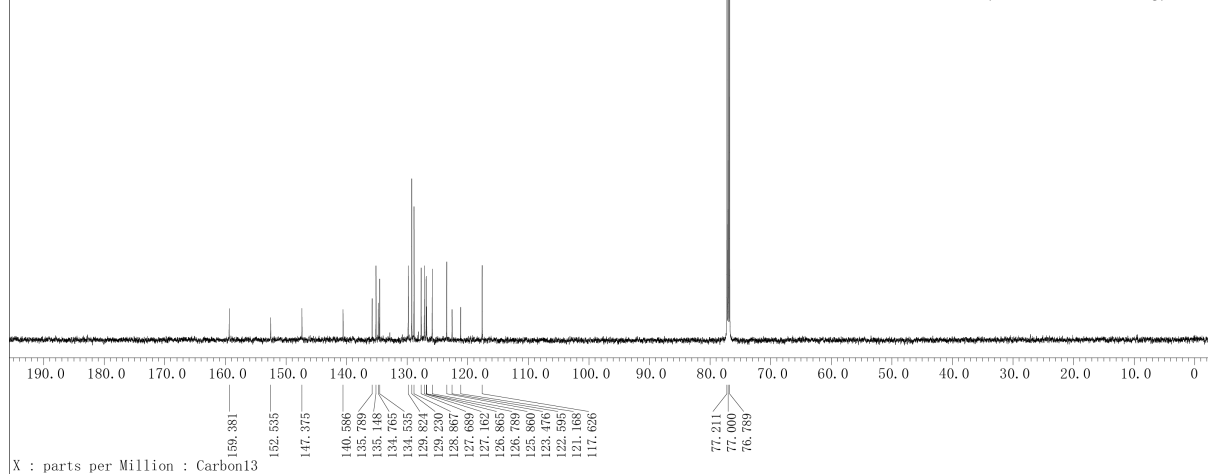

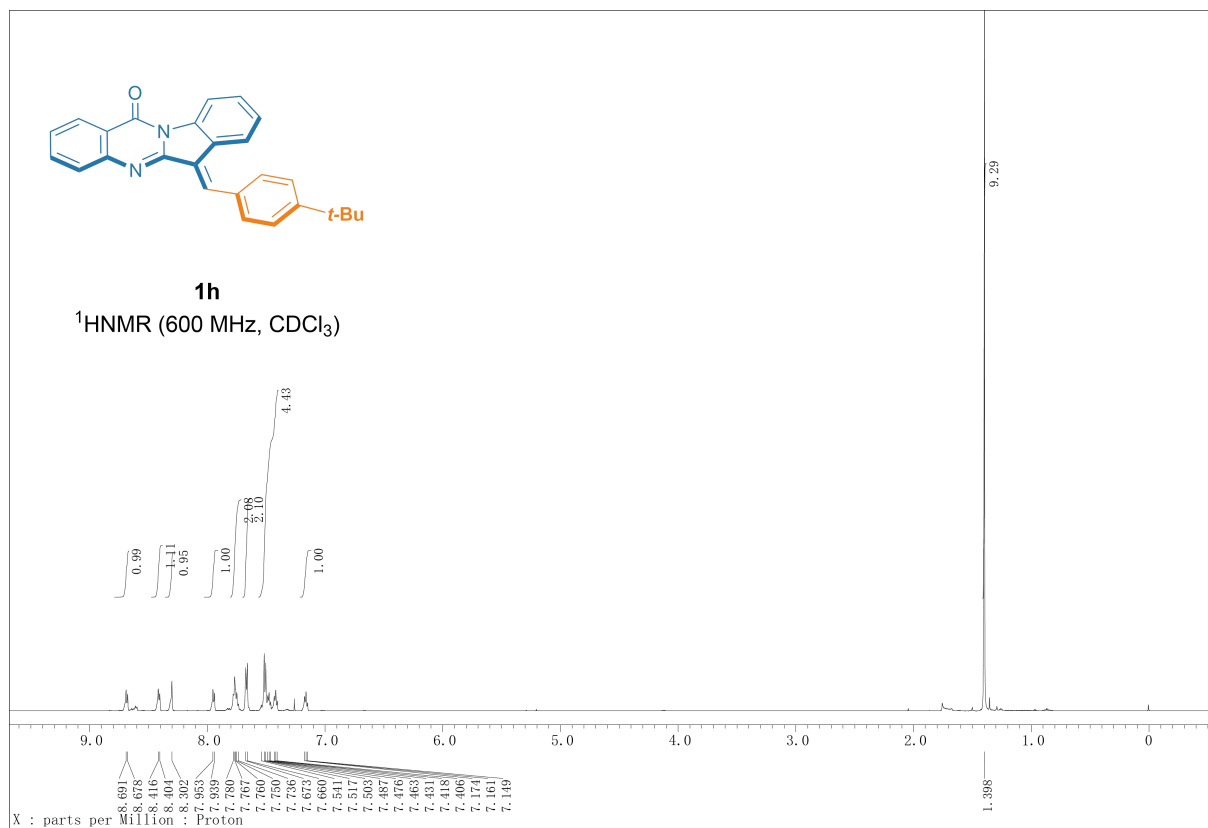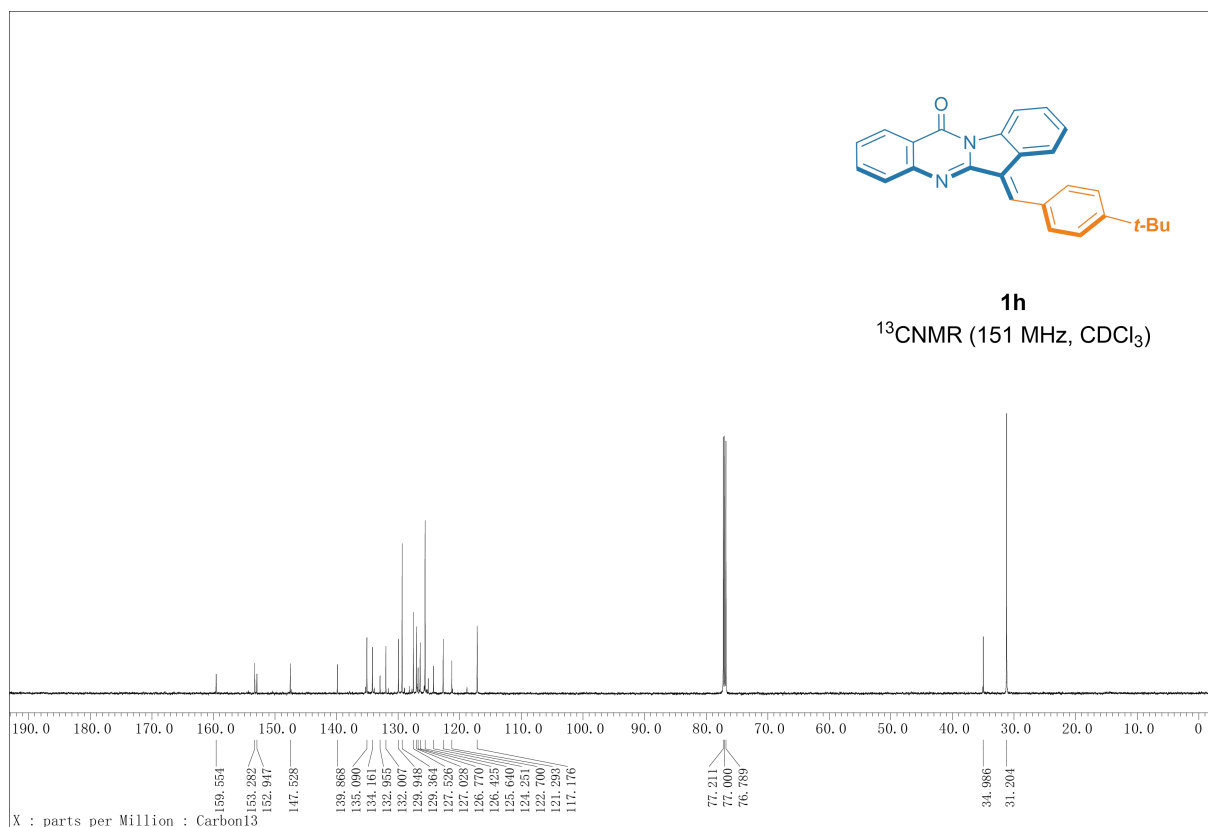

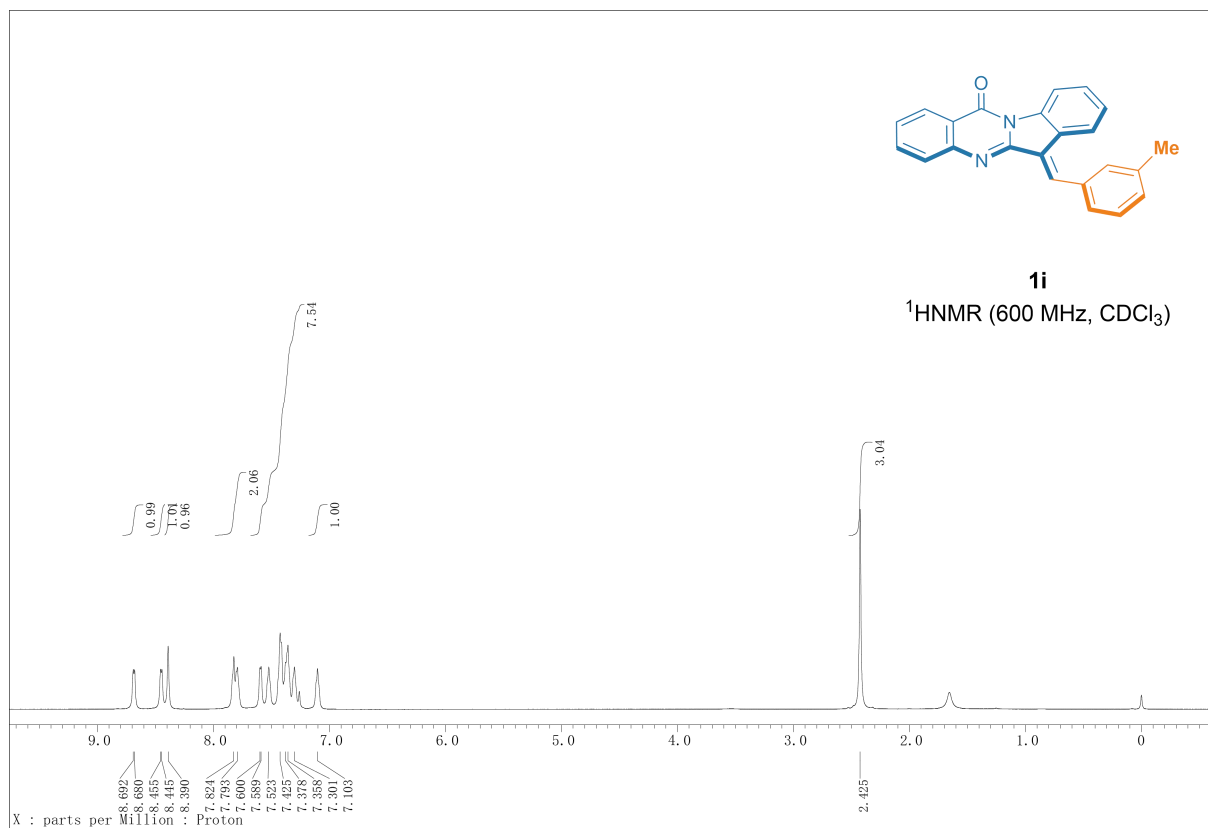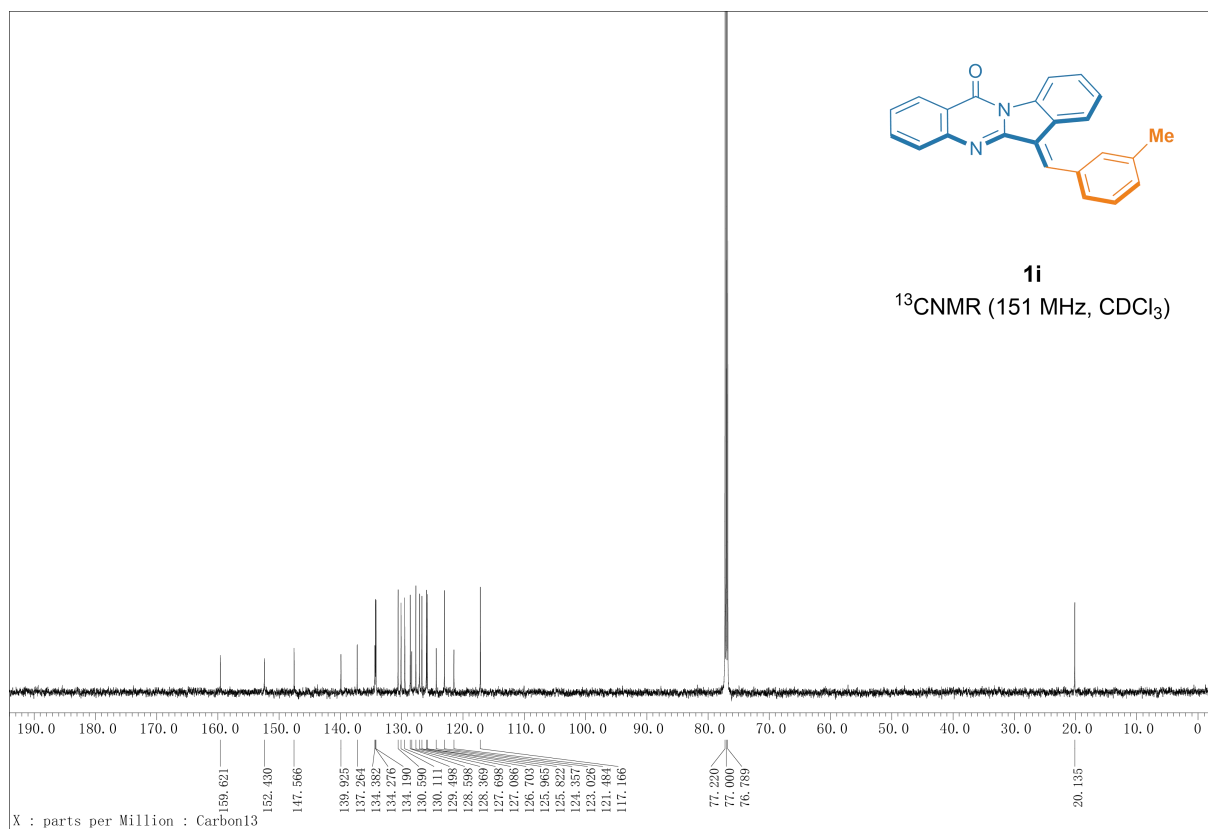



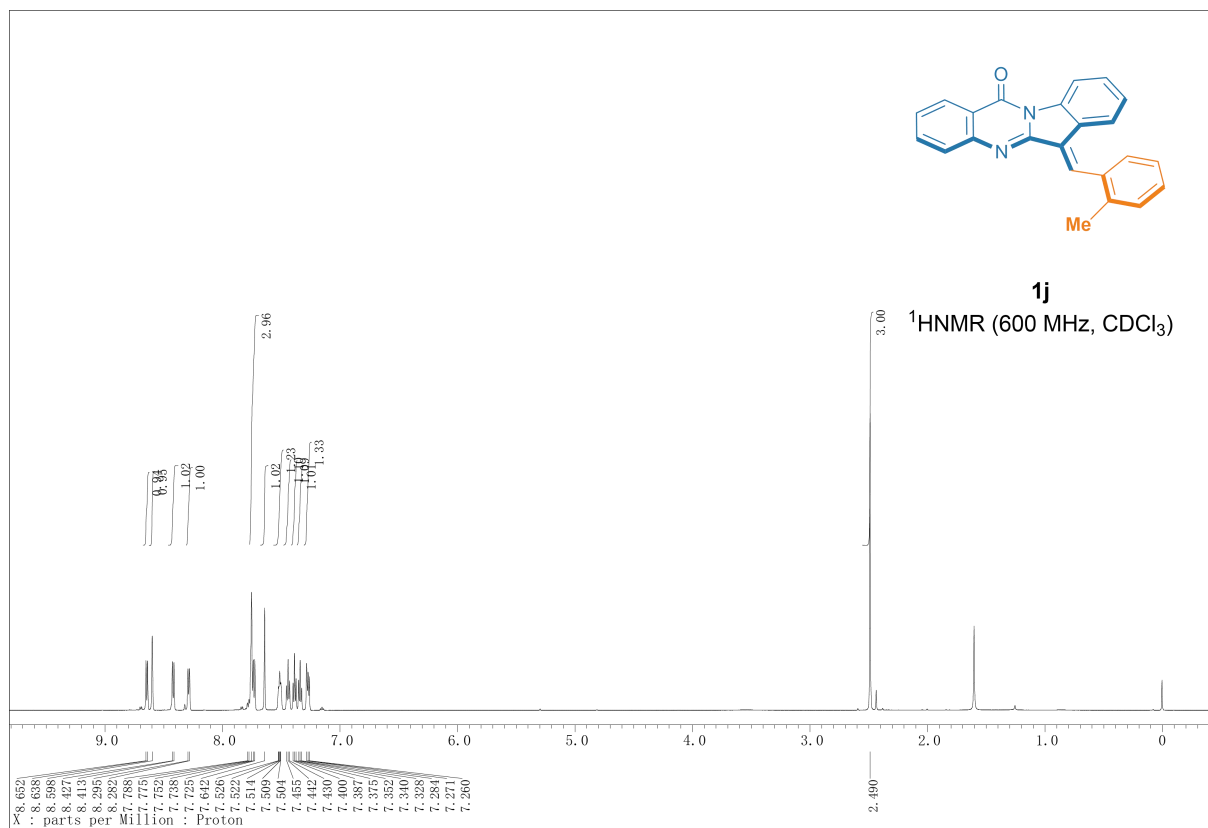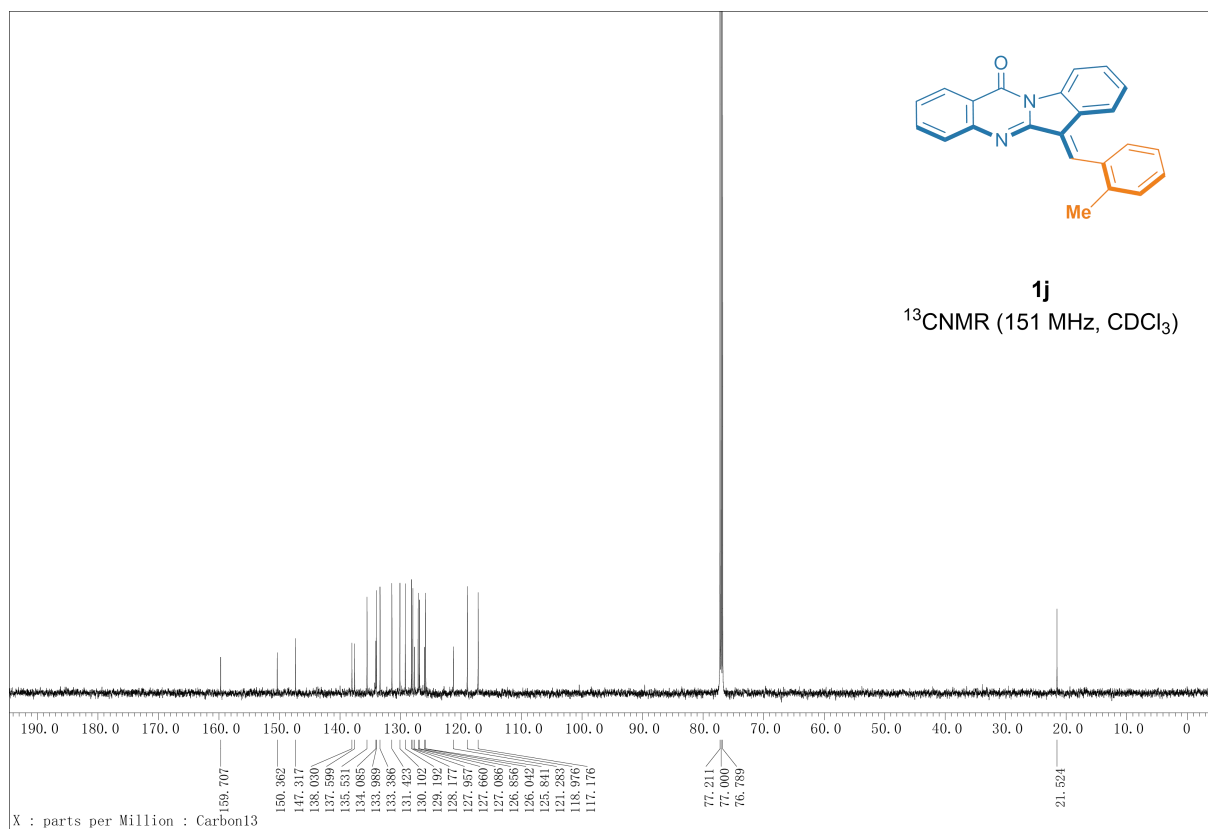

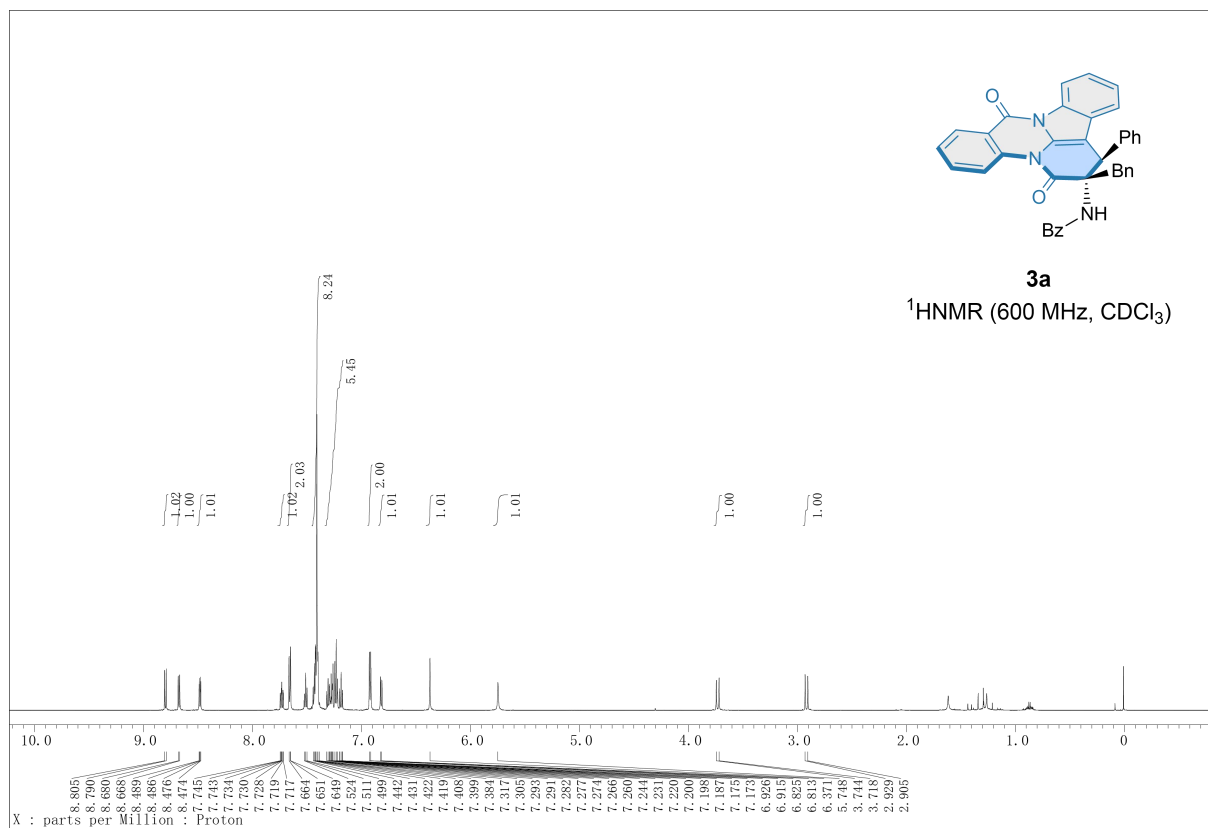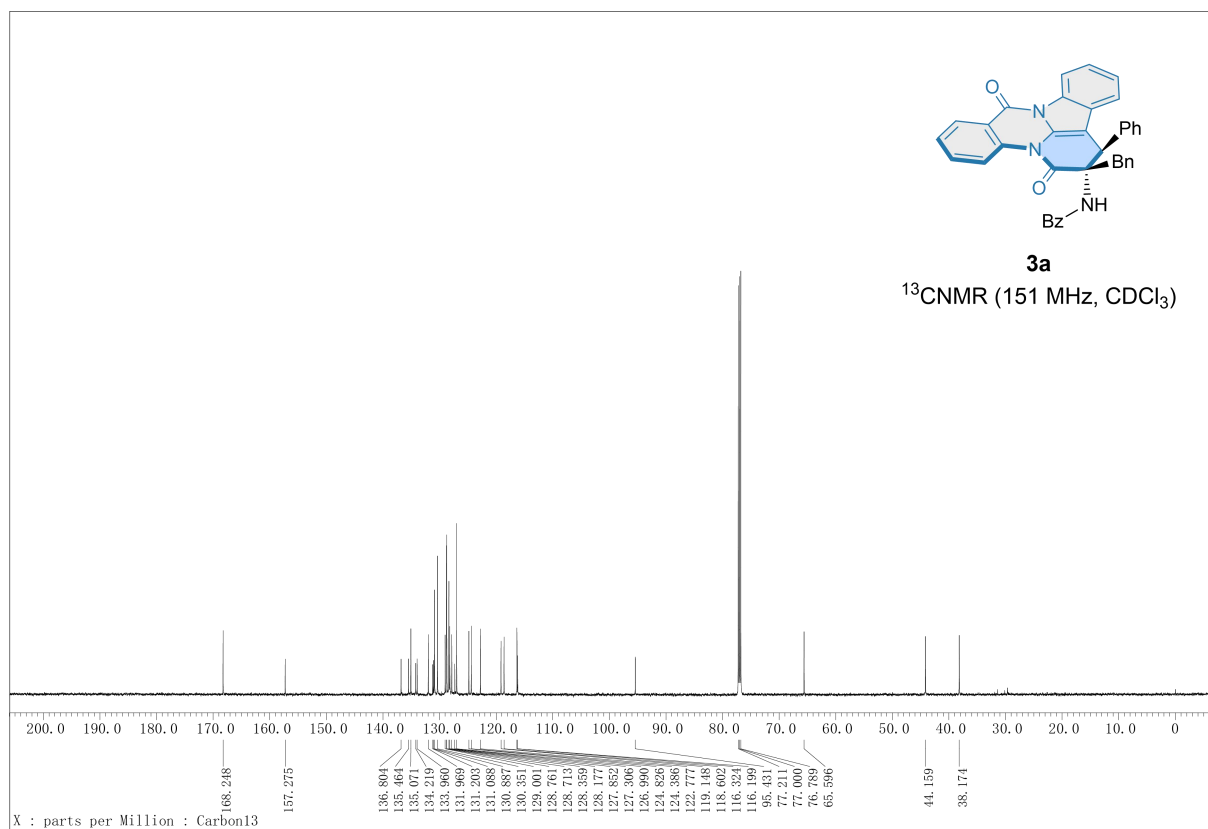

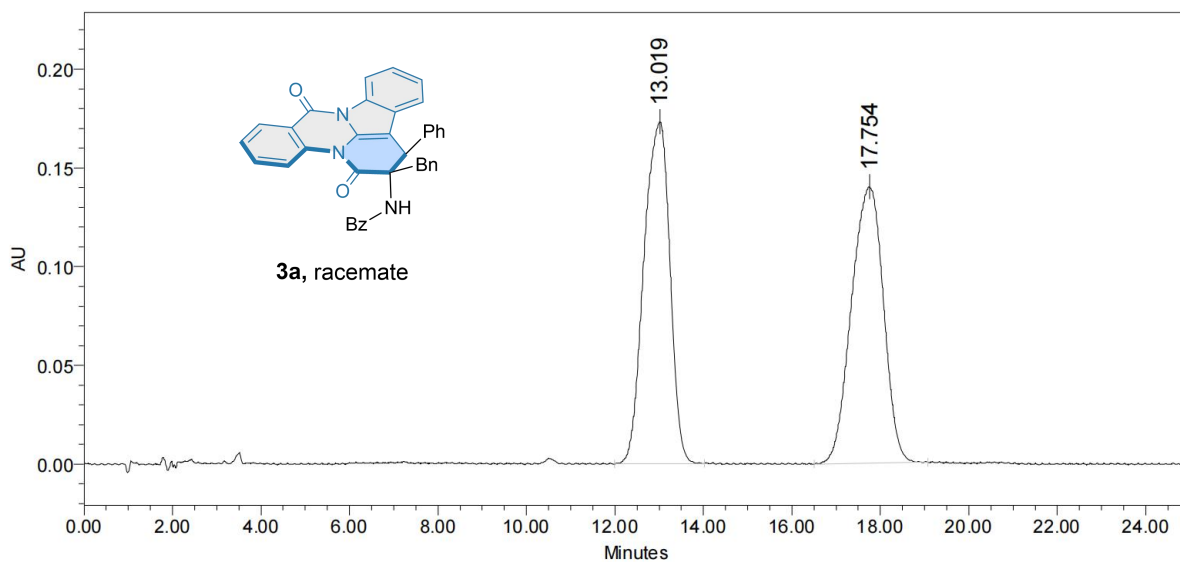

|   | Ret.Time(min) | Height( $\mu$ V) | Area( $\mu$ V*sec) | Rel.Area(%) |
|---|---------------|------------------|--------------------|-------------|
| 1 | 13.019        | 173079           | 7092529            | 50.06       |
| 2 | 17.754        | 139859           | 7074470            | 49.94       |

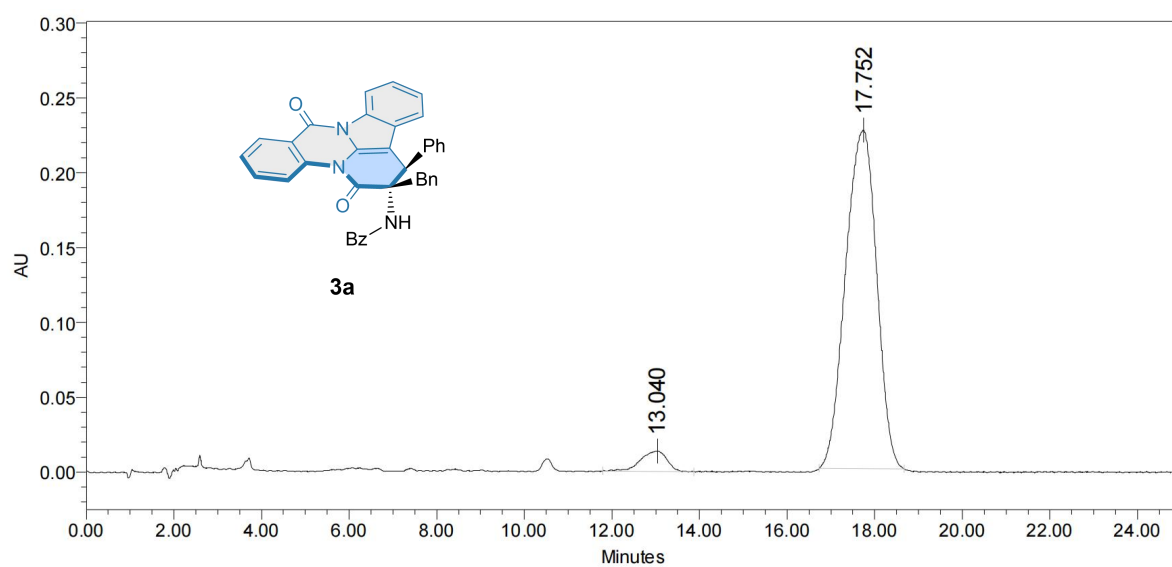

|   | Ret.Time(min) | Height(mV) | Area(mV*sec) | Rel.Area(%) |
|---|---------------|------------|--------------|-------------|
| 1 | 13.040        | 13629      | 568438       | 4.83        |
| 2 | 17.752        | 225948     | 11188521     | 95.17       |

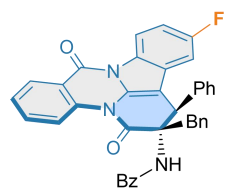

**3b**

$^1\text{H}$ NMR (600 MHz,  $\text{CDCl}_3$ )

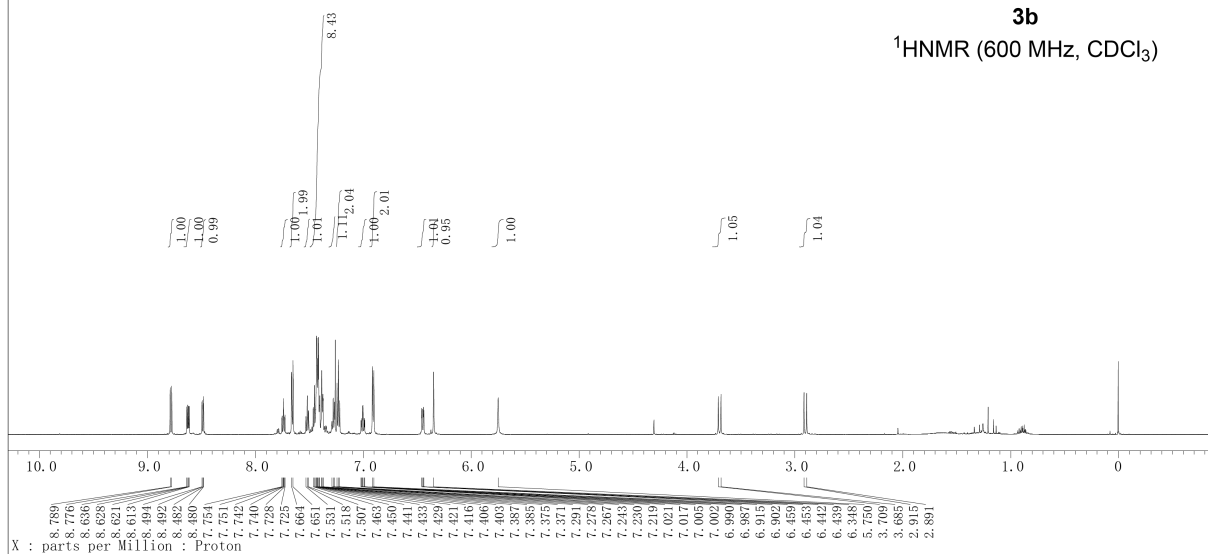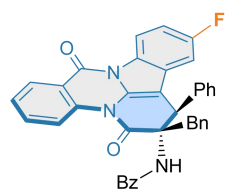

**3b**

$^{13}\text{C}$ NMR (151 MHz,  $\text{CDCl}_3$ )

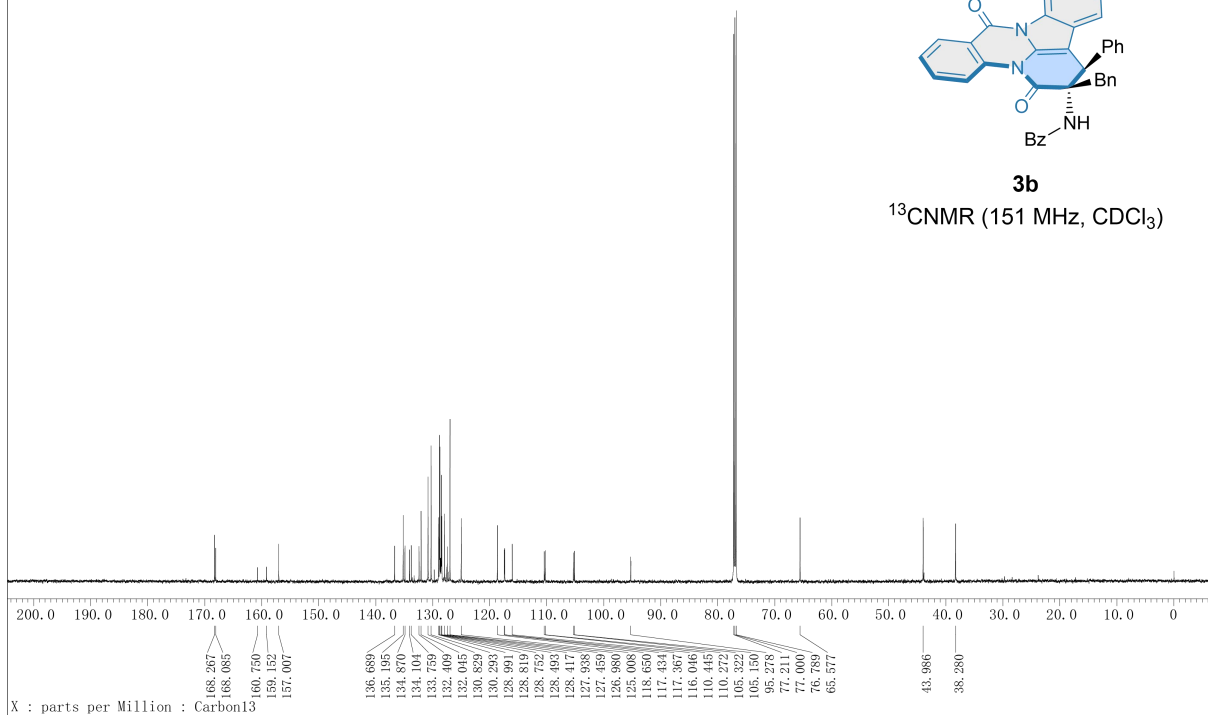

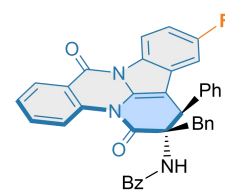

**3b**

$^{19}\text{F}$  (564 MHz,  $\text{CDCl}_3$ )

$\text{PhCF}_3$  ( -63.2 ppm)  
as the internal standard

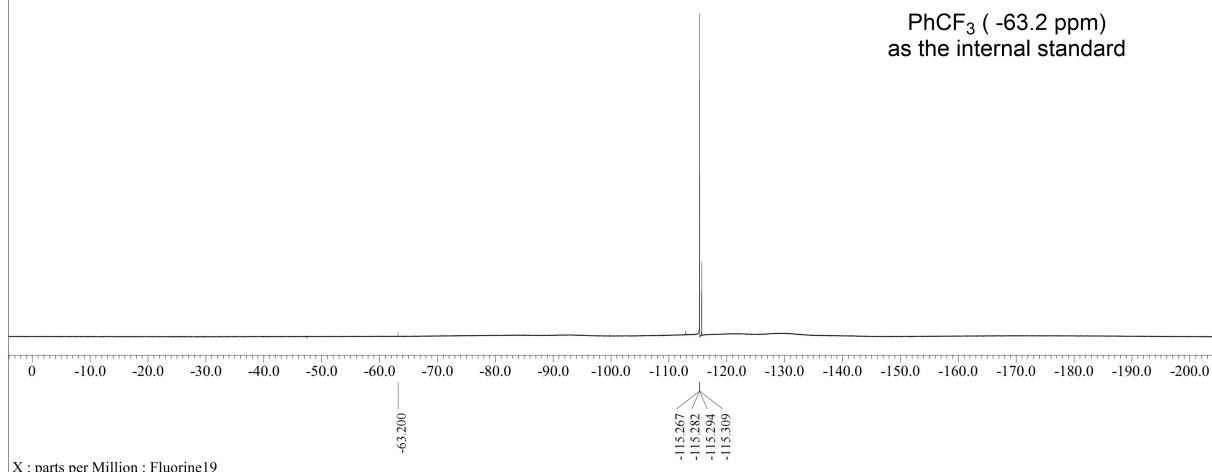

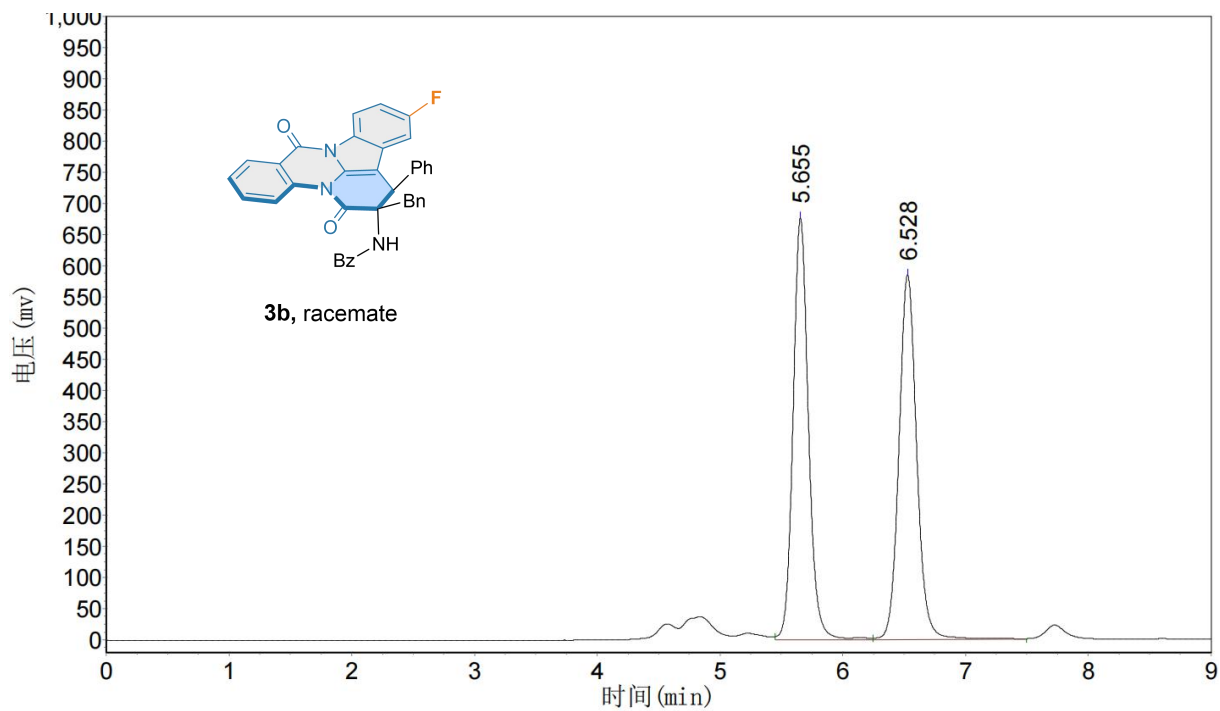

|   | Ret.Time(min) | Height( $\mu$ V) | Area( $\mu$ V*sec) | Rel.Area(%) |
|---|---------------|------------------|--------------------|-------------|
| 1 | 5.655         | 676628           | 5894318            | 50.02       |
| 2 | 6.528         | 585343           | 5889047            | 49.98       |

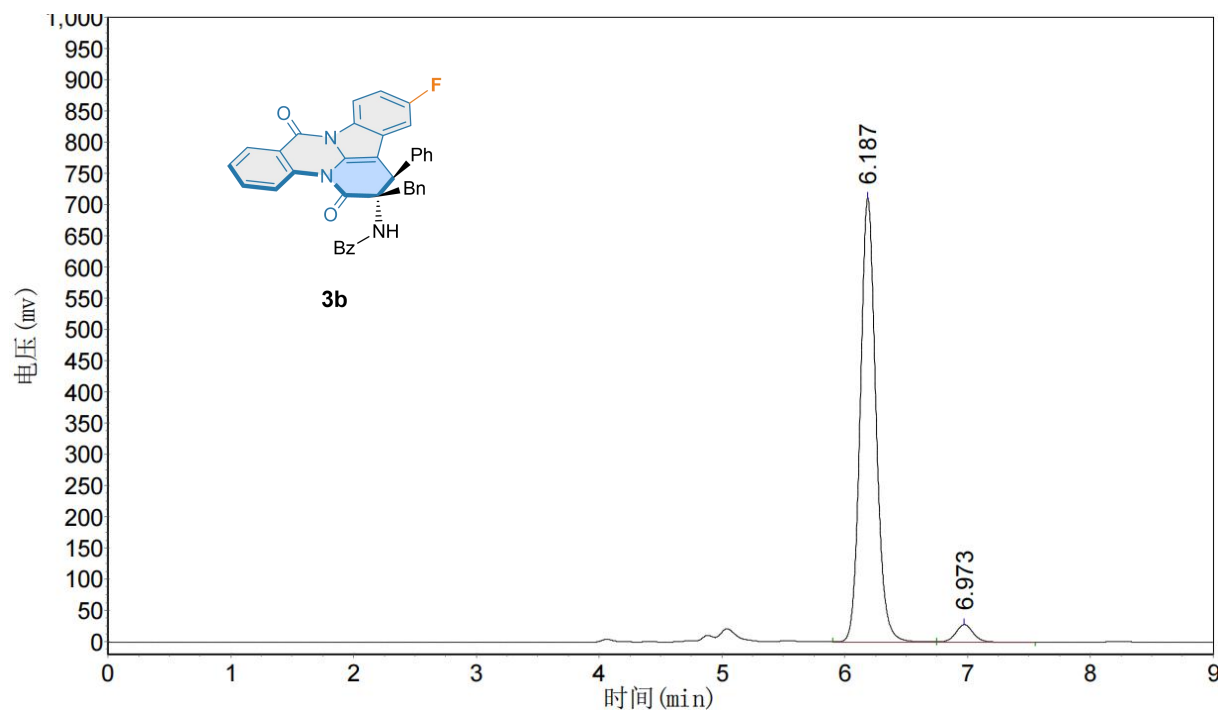

|   | Ret.Time(min) | Height( $\mu$ V) | Area( $\mu$ V*sec) | Rel.Area(%) |
|---|---------------|------------------|--------------------|-------------|
| 1 | 6.187         | 712007           | 6319438            | 95.72       |
| 2 | 6.973         | 28135            | 282389             | 4.28        |

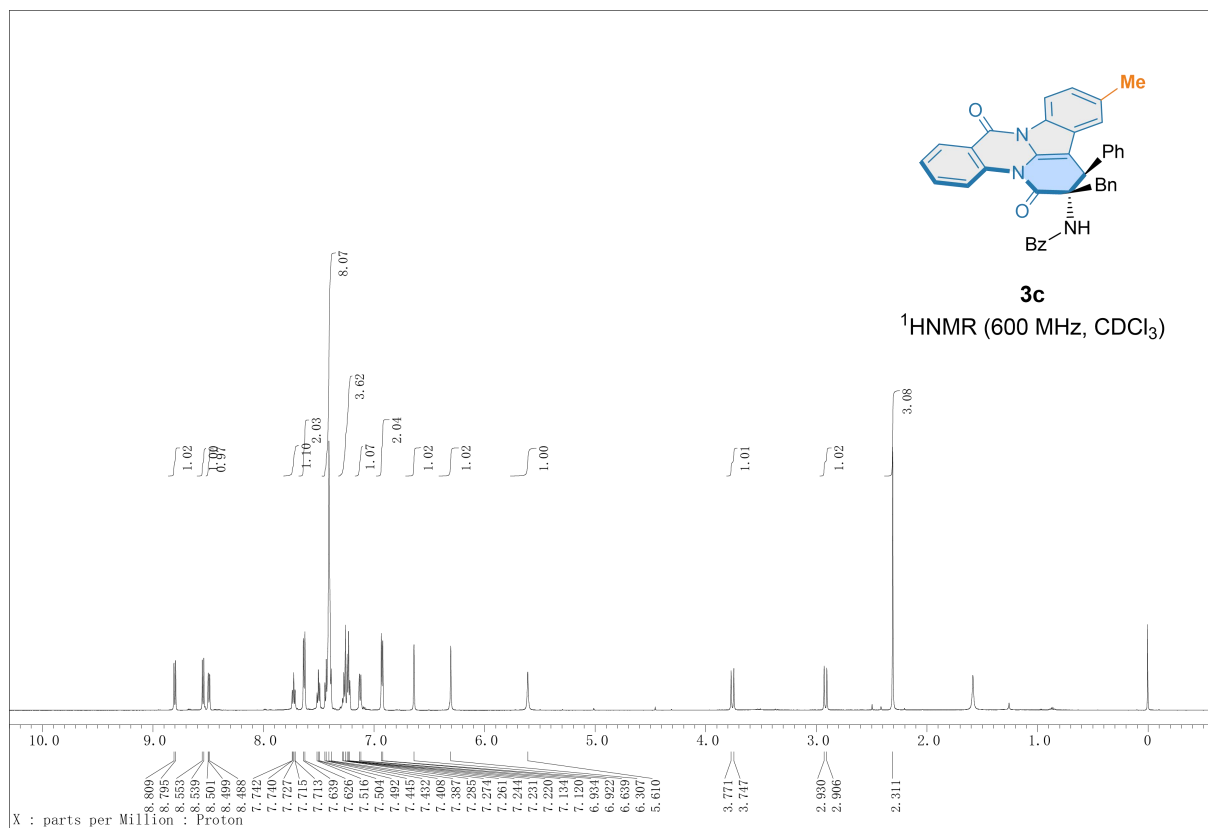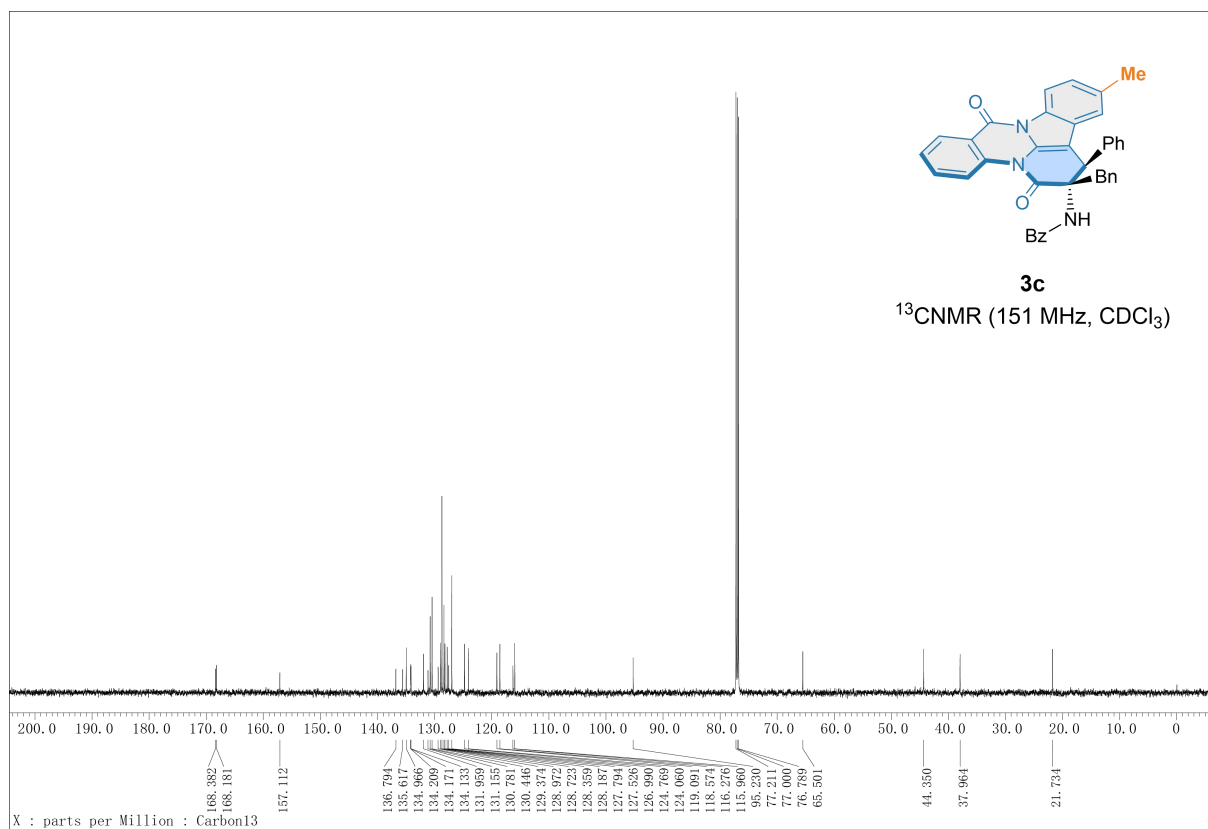

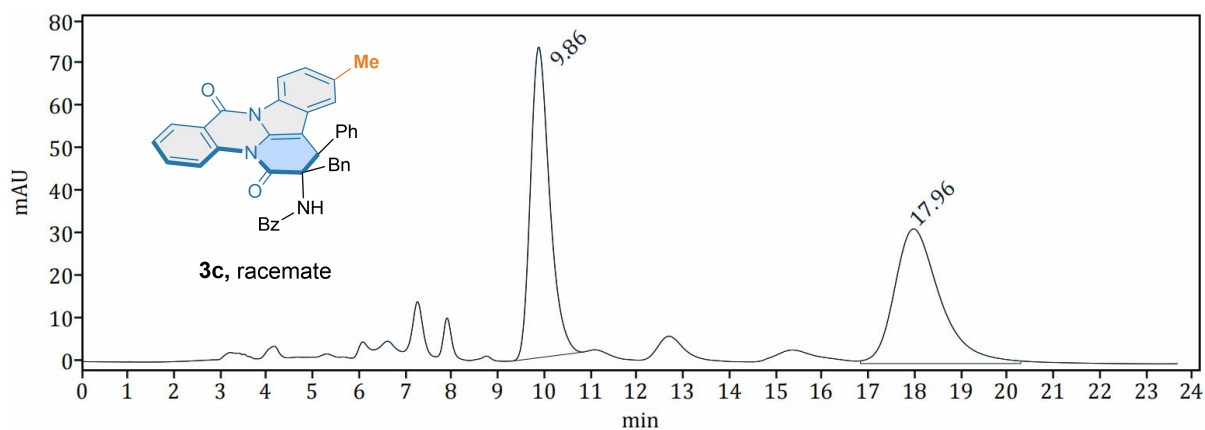

### Peak Analysis Report

| Peak # | Ret. Time [min] | Area [mAU*s] | Height [mAU] | Rel. Area [%] |
|--------|-----------------|--------------|--------------|---------------|
| 1      | 9.86            | 2112.801     | 73.2066      | 49.2165       |
| 2      | 17.96           | 2180.073     | 31.7515      | 50.7835       |

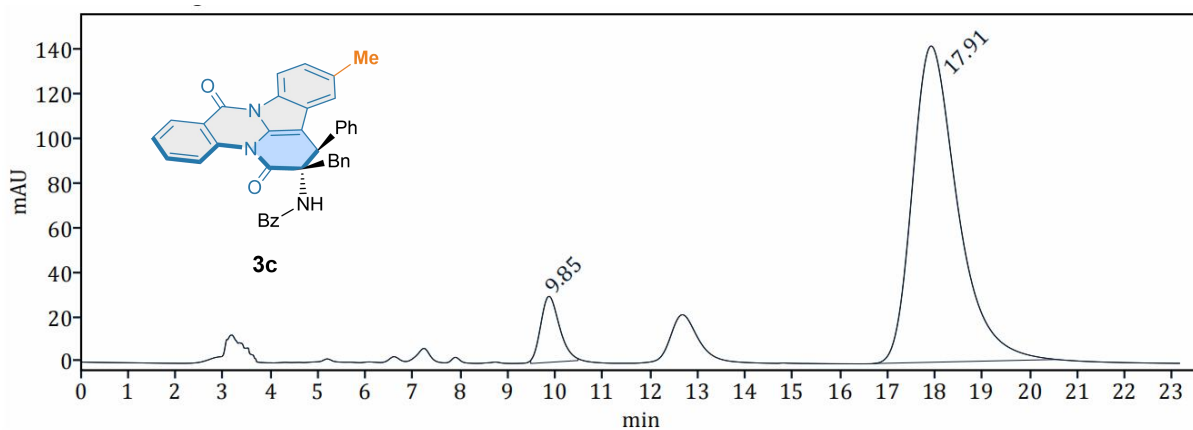

### Peak Analysis Report

| Peak # | Ret. Time [min] | Area [mAU*s] | Height [mAU] | Rel. Area [%] |
|--------|-----------------|--------------|--------------|---------------|
| 1      | 9.85            | 817.163      | 29.6710      | 8.0012        |
| 2      | 17.91           | 9395.842     | 142.1854     | 91.9988       |



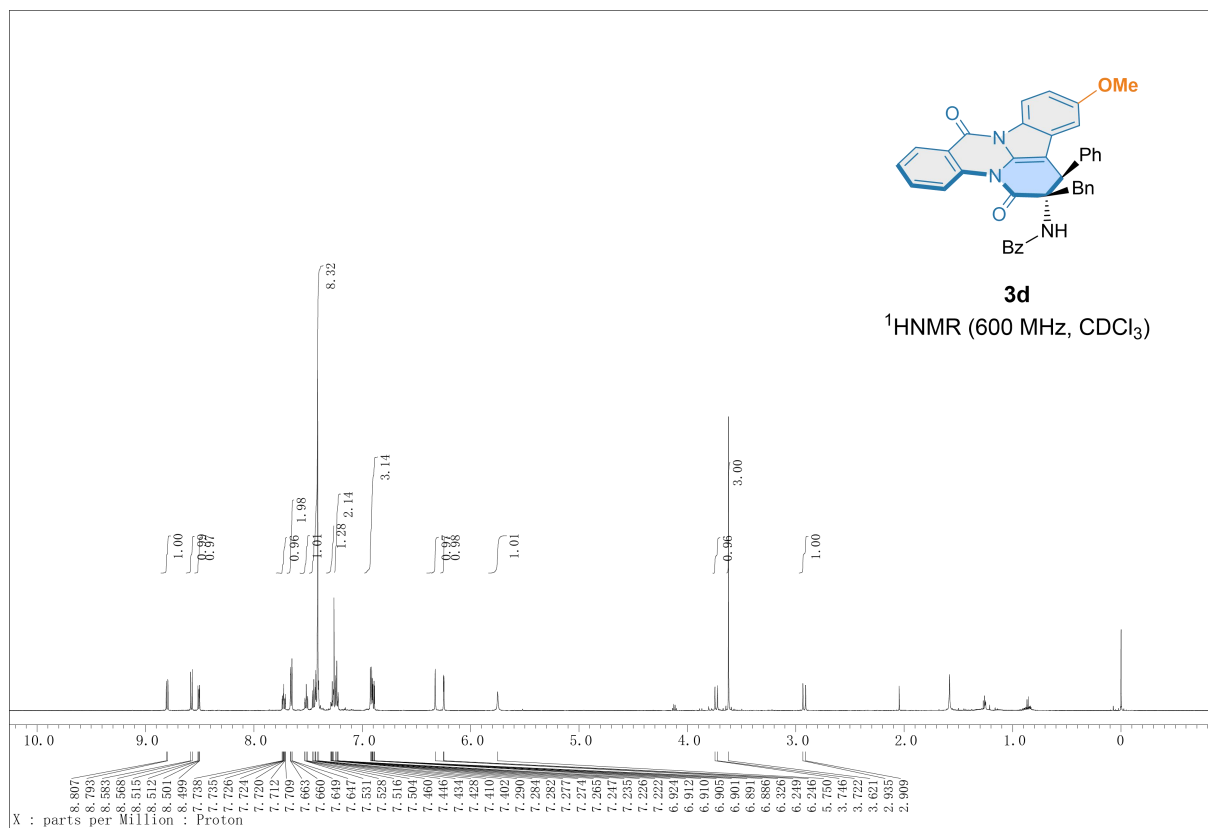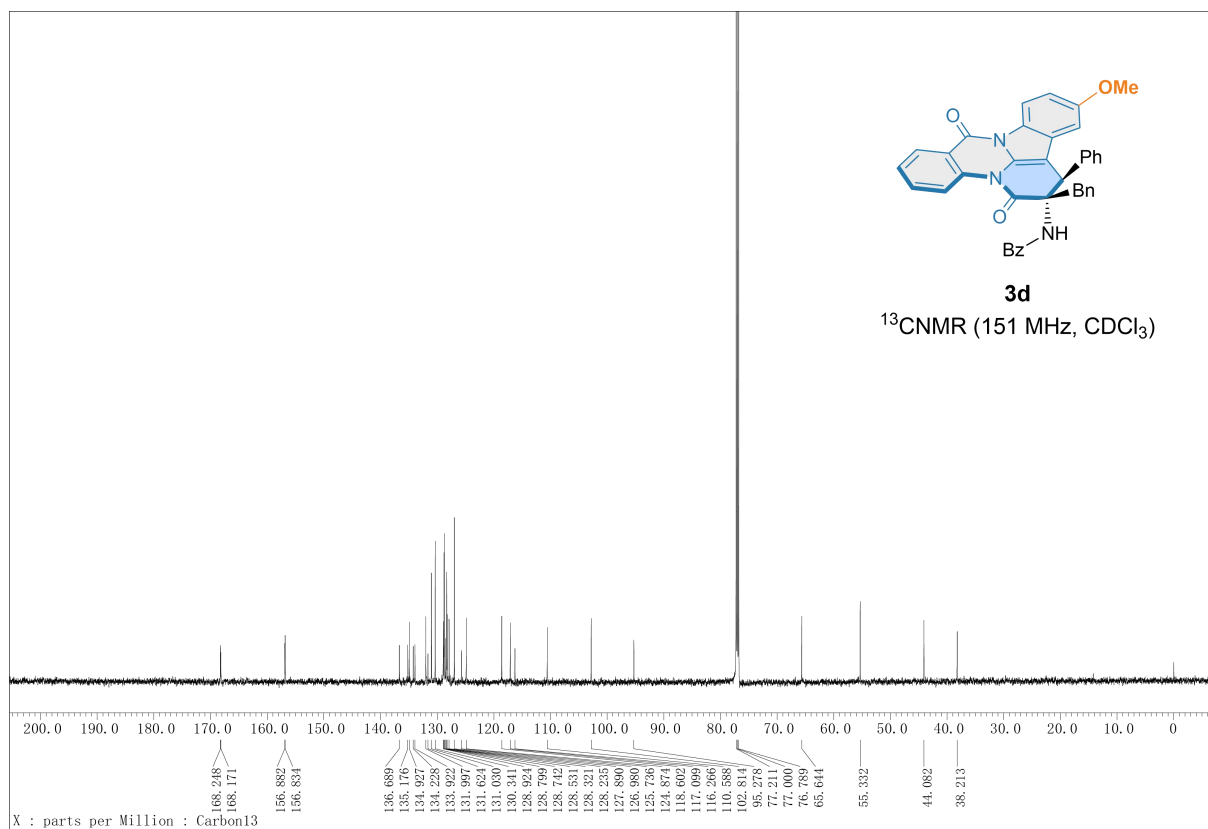

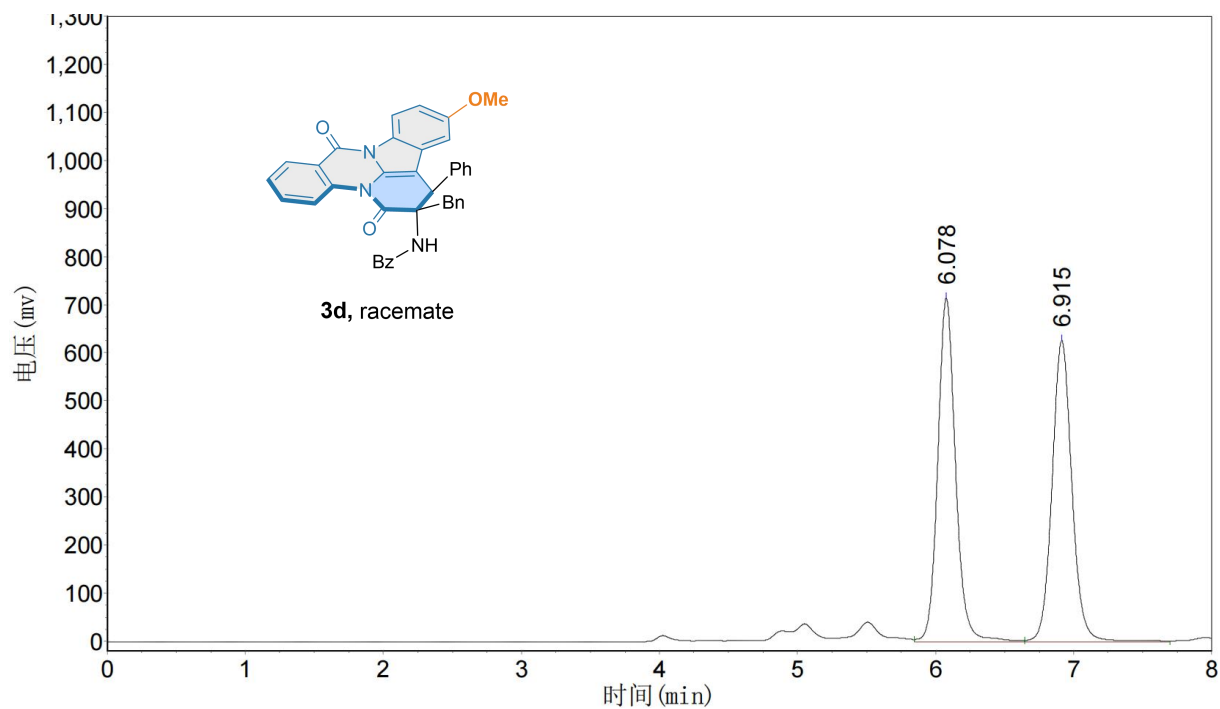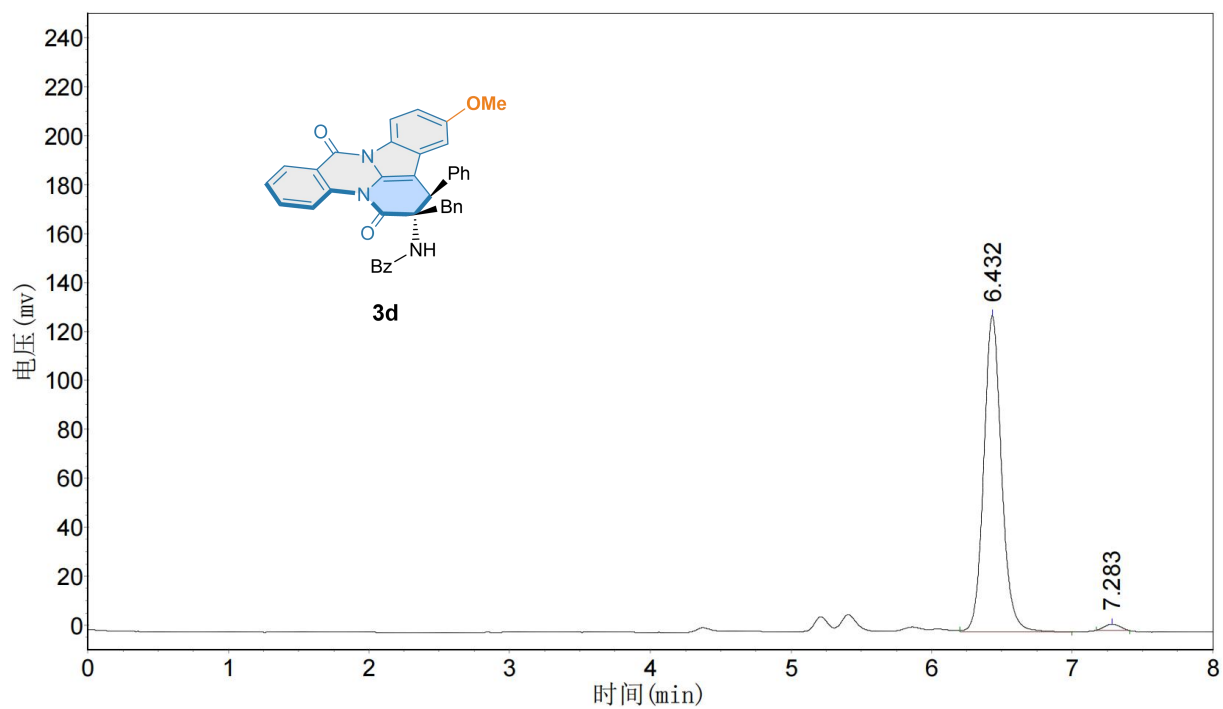

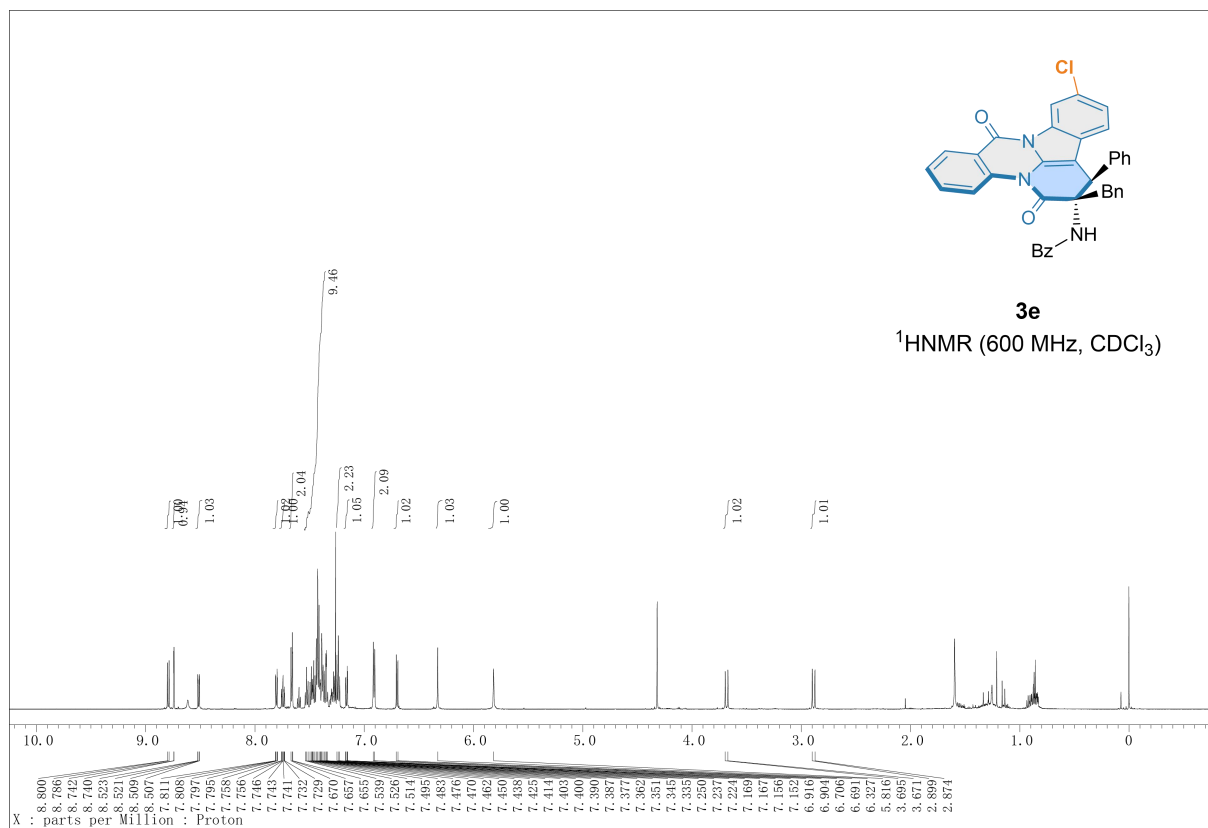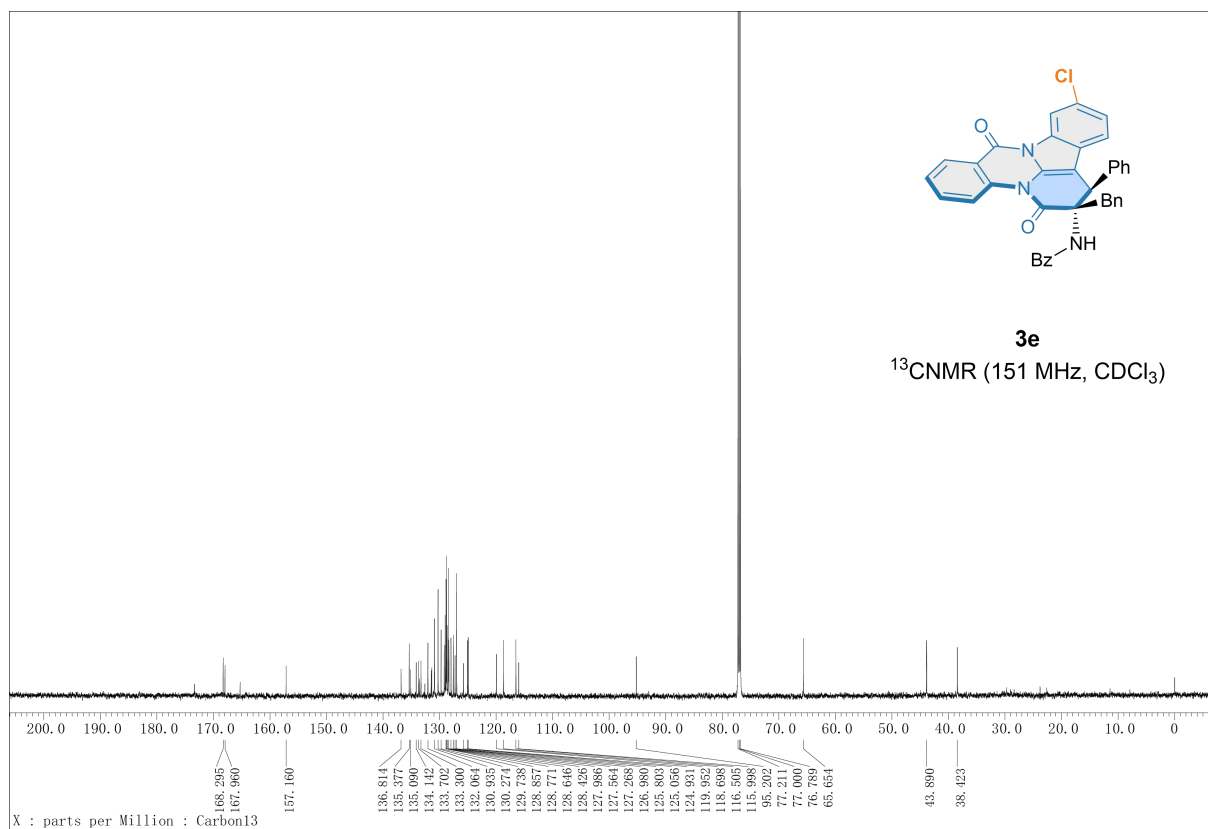

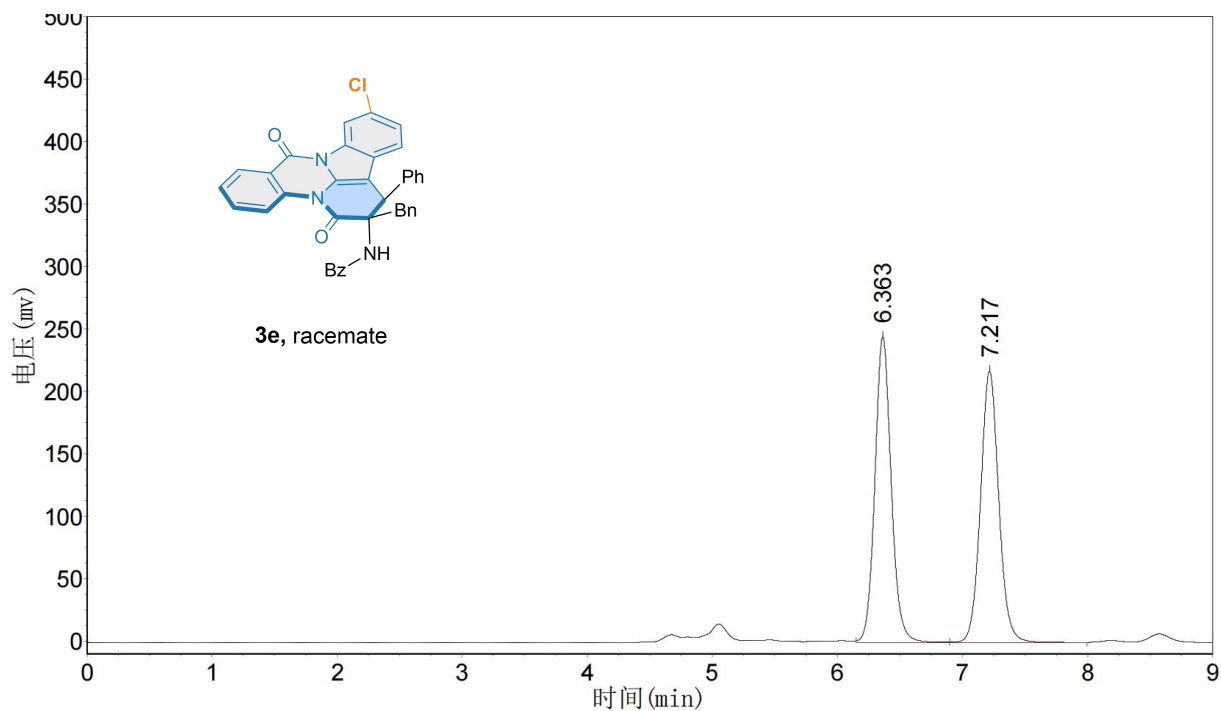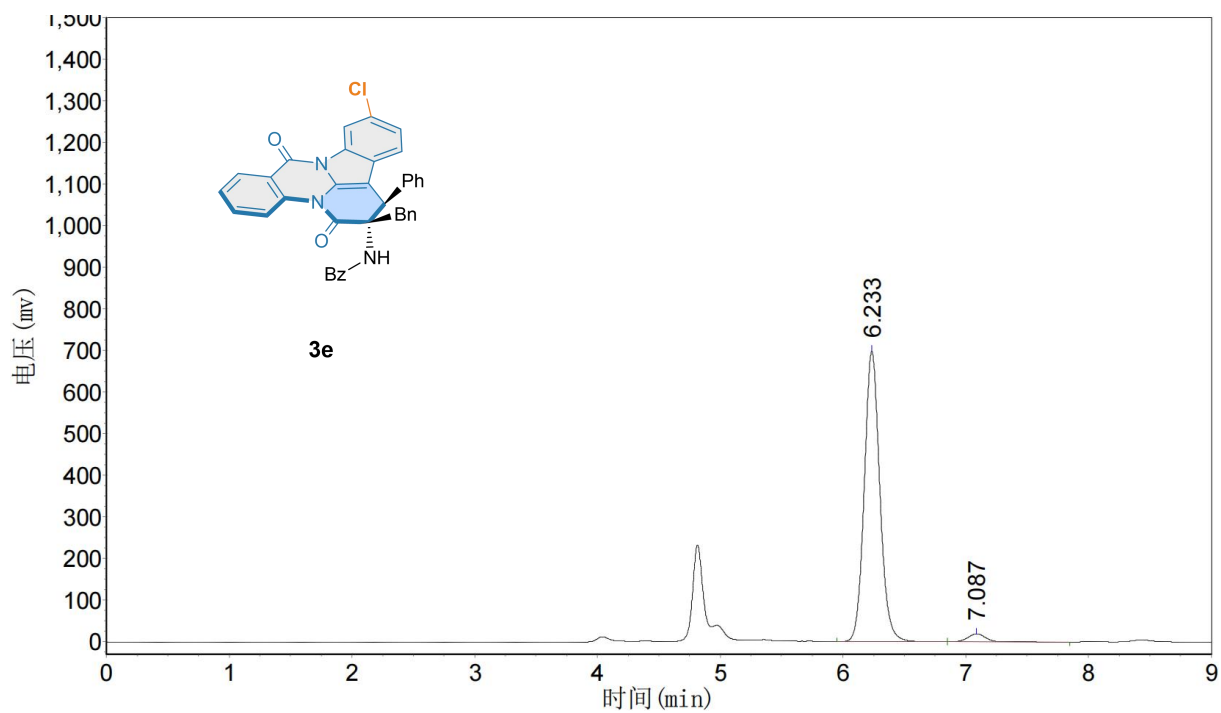

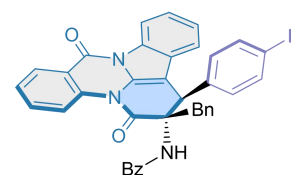

**3f**

$^1\text{H}$ NMR (600 MHz,  $\text{CDCl}_3$ )

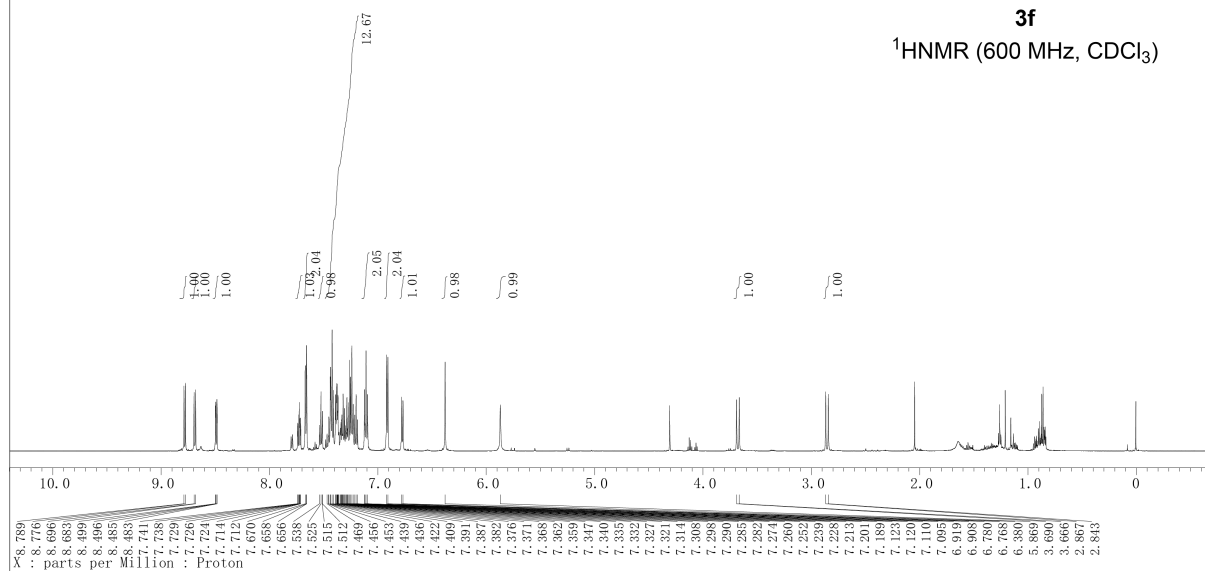

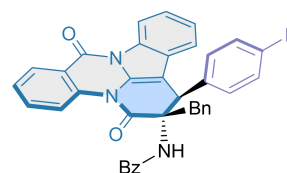

**3f**

$^{19}\text{F}$  (564 MHz,  $\text{CDCl}_3$ )

$\text{PhCF}_3$  ( -63.2 ppm)  
as the internal standard

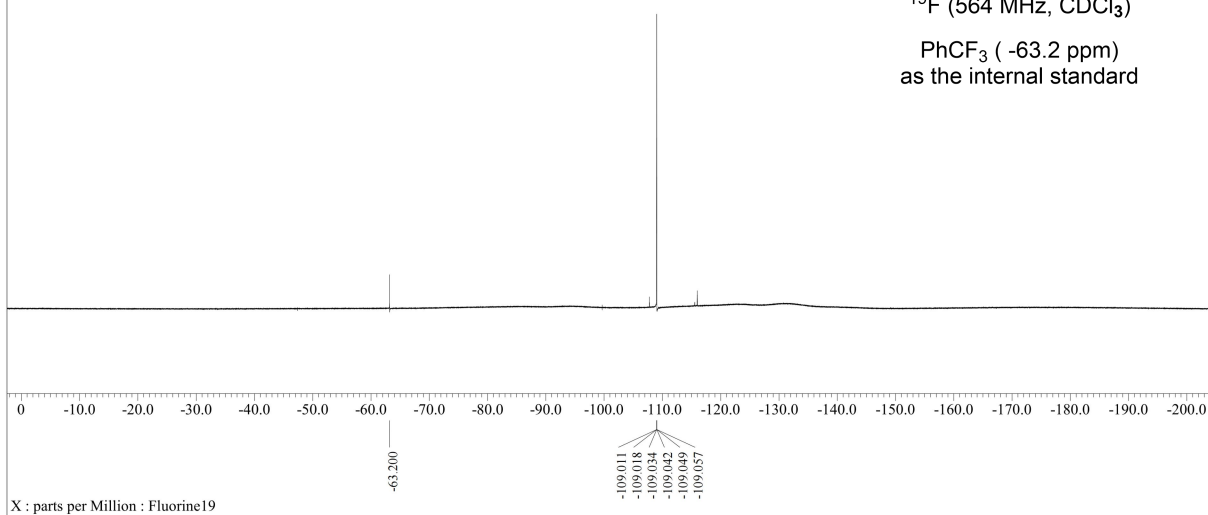

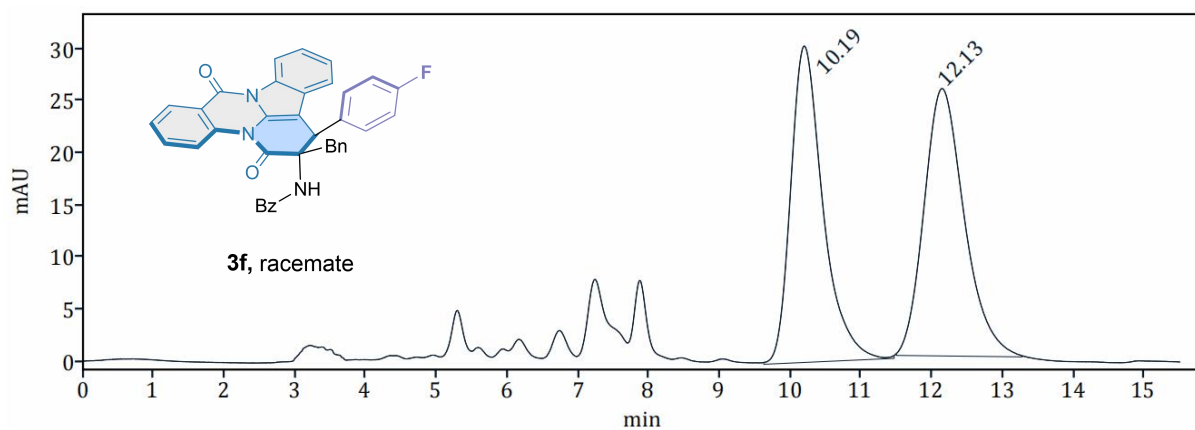

#### Peak Analysis Report

| Peak # | Ret. Time [min] | Area [mAU*s] | Height [mAU] | Rel. Area [%] |
|--------|-----------------|--------------|--------------|---------------|
| 1      | 10.19           | 960.684      | 30.3776      | 48.6219       |
| 2      | 12.13           | 1015.140     | 25.6637      | 51.3781       |

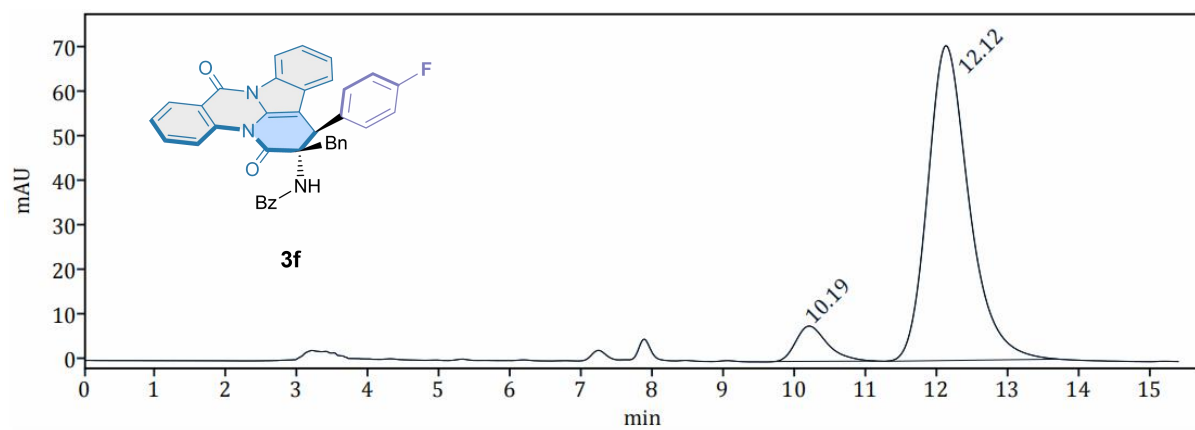

#### Peak Analysis Report

| Peak # | Ret. Time [min] | Area [mAU*s] | Height [mAU] | Rel. Area [%] |
|--------|-----------------|--------------|--------------|---------------|
| 1      | 10.19           | 246.097      | 7.9465       | 7.8880        |
| 2      | 12.12           | 2873.798     | 70.7770      | 92.1120       |

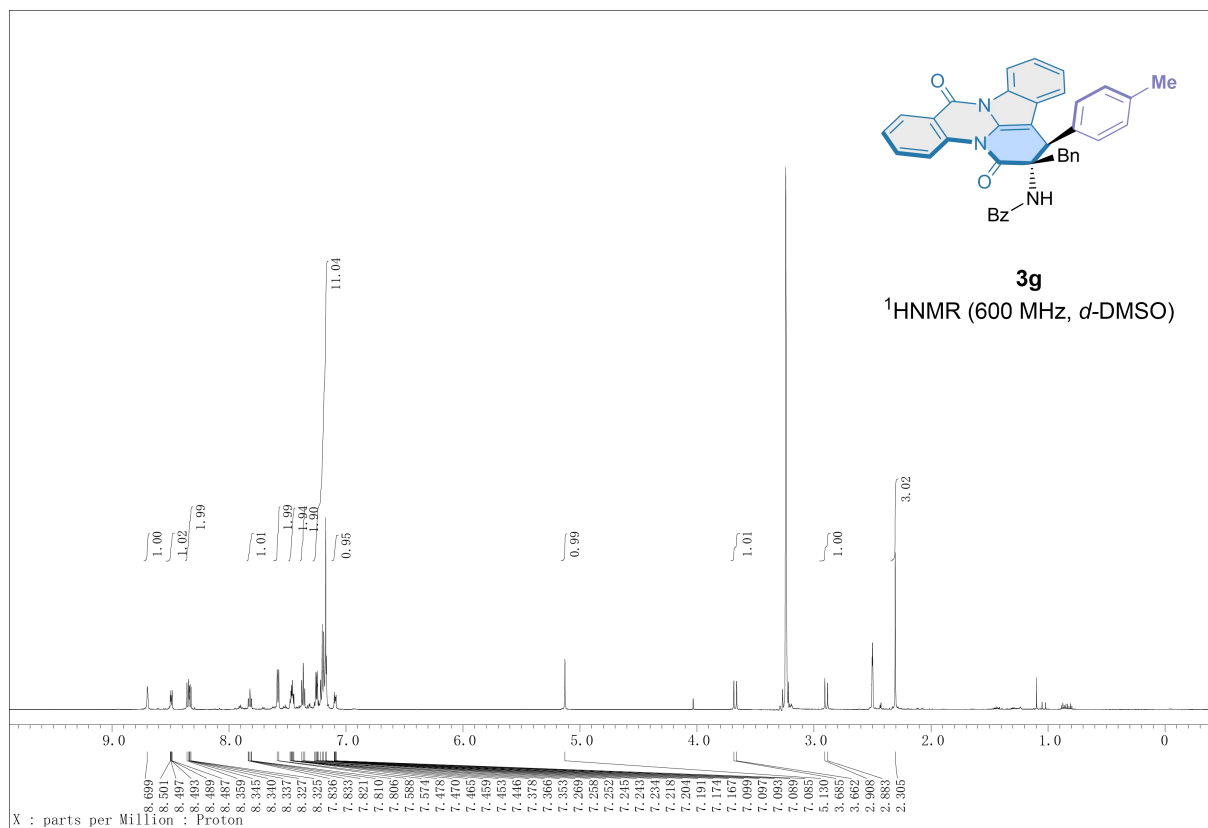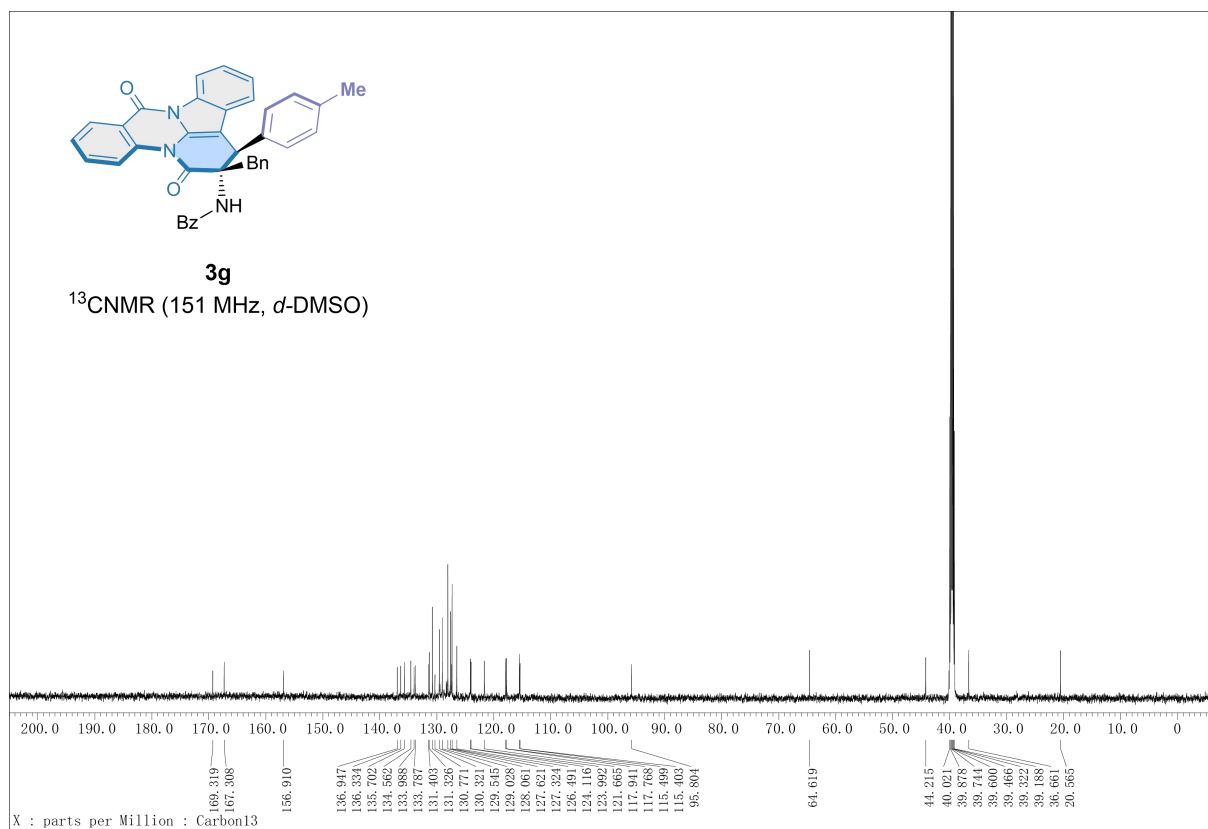



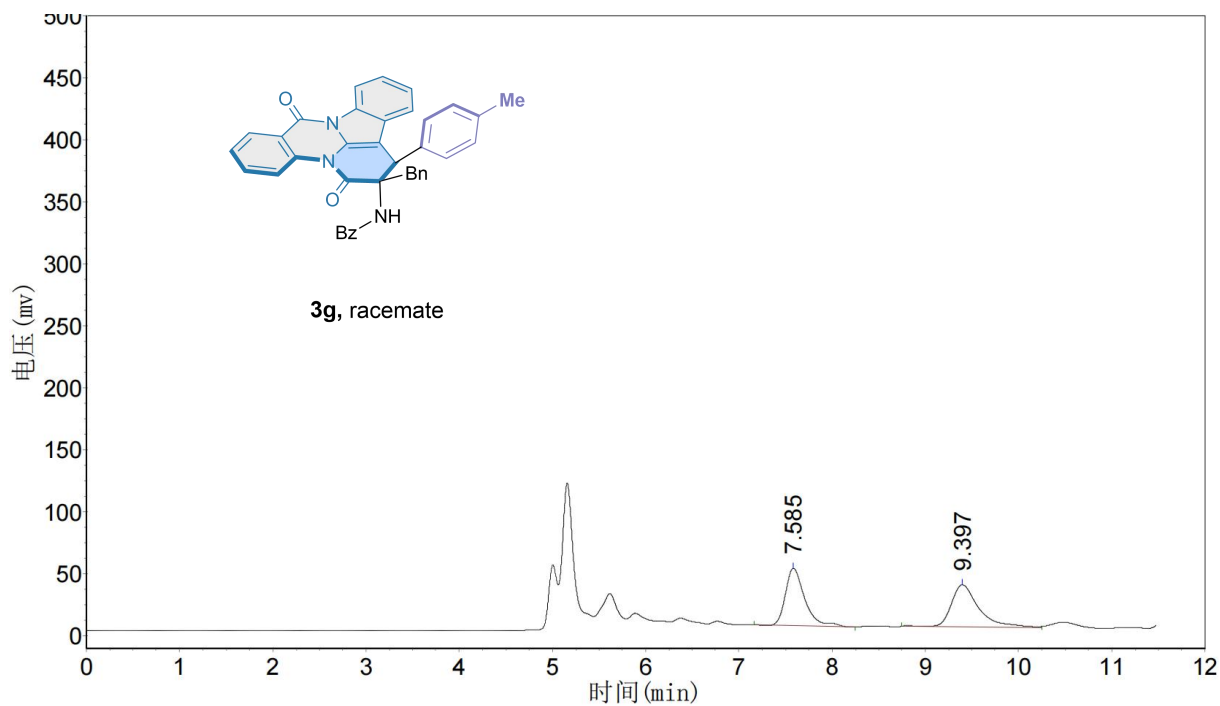

|   | Ret.Time(min) | Height(μV) | Area(μV*sec) | Rel.Area(%) |
|---|---------------|------------|--------------|-------------|
| 1 | 7.585         | 46392      | 666936       | 49.00       |
| 2 | 9.397         | 33821      | 694043       | 51.00       |

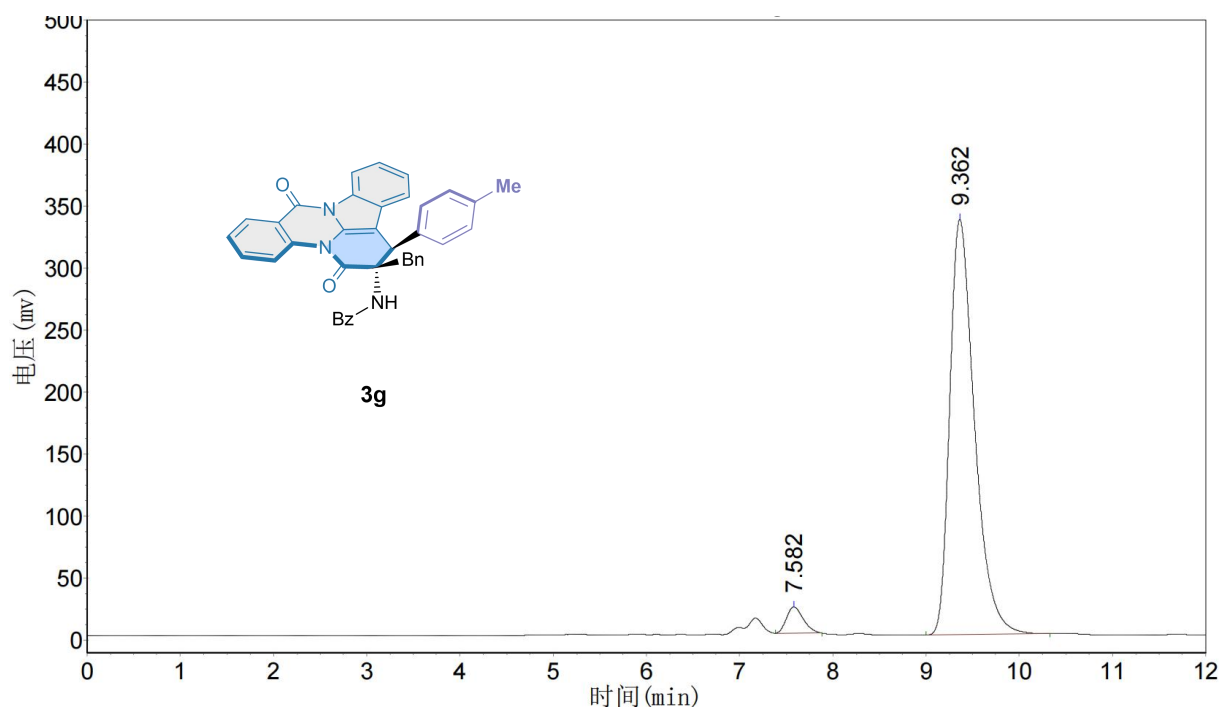

|   | Ret.Time(min) | Height(μV) | Area(μV*sec) | Rel.Area(%) |
|---|---------------|------------|--------------|-------------|
| 1 | 7.582         | 21107      | 264338       | 4.10        |
| 2 | 4.1016        | 334930     | 6180486      | 95.90       |

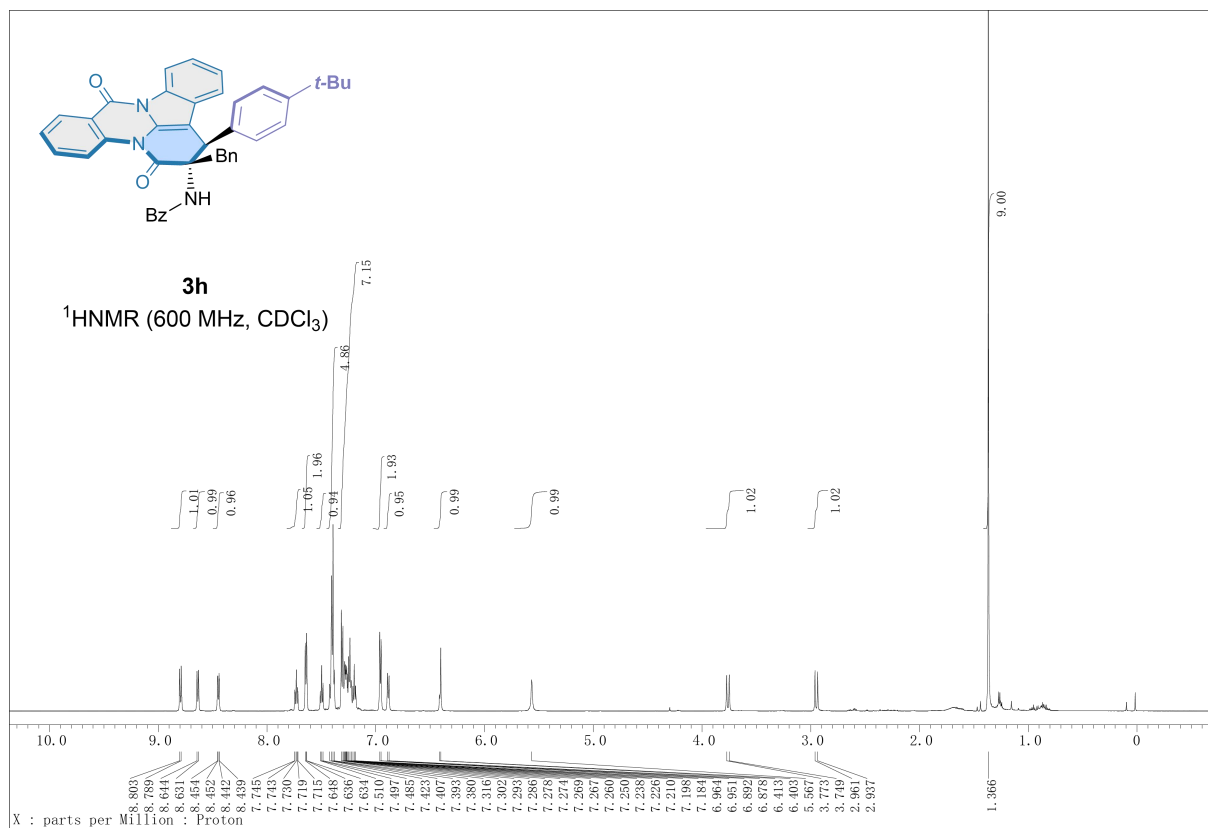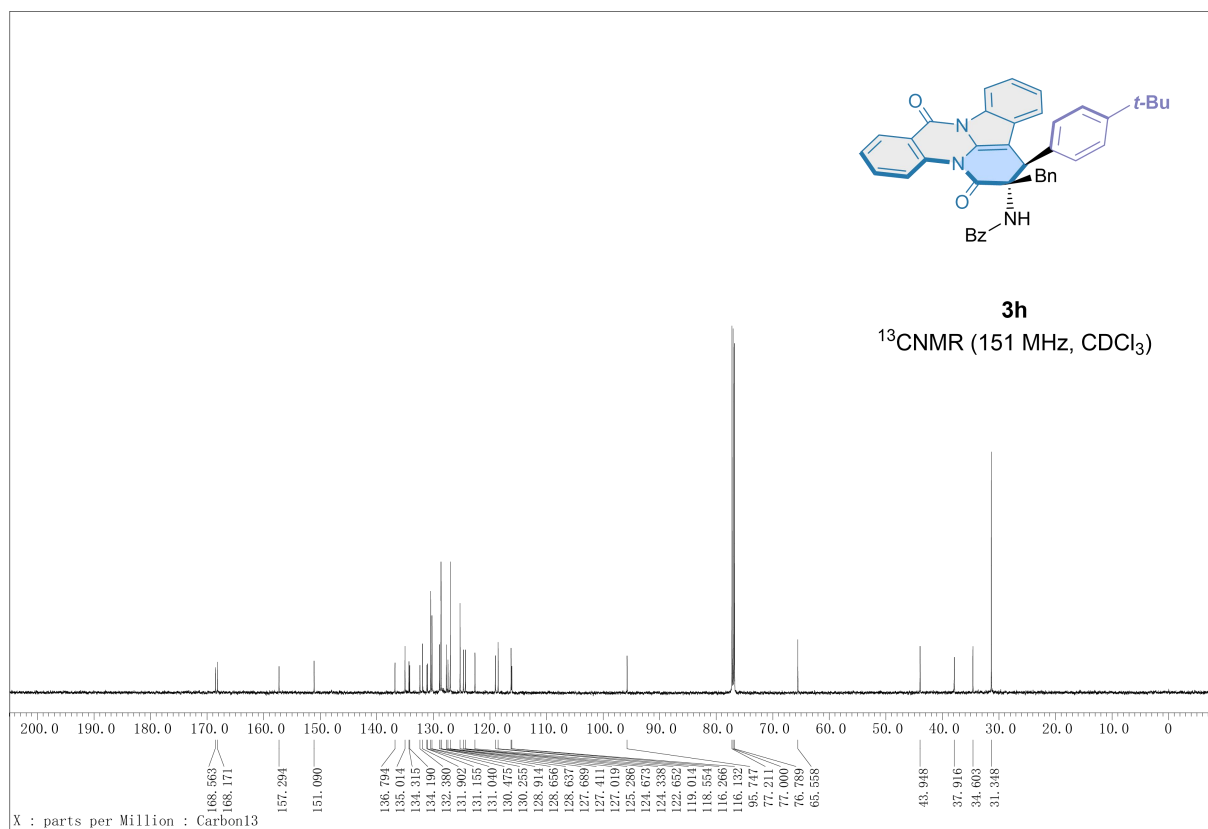

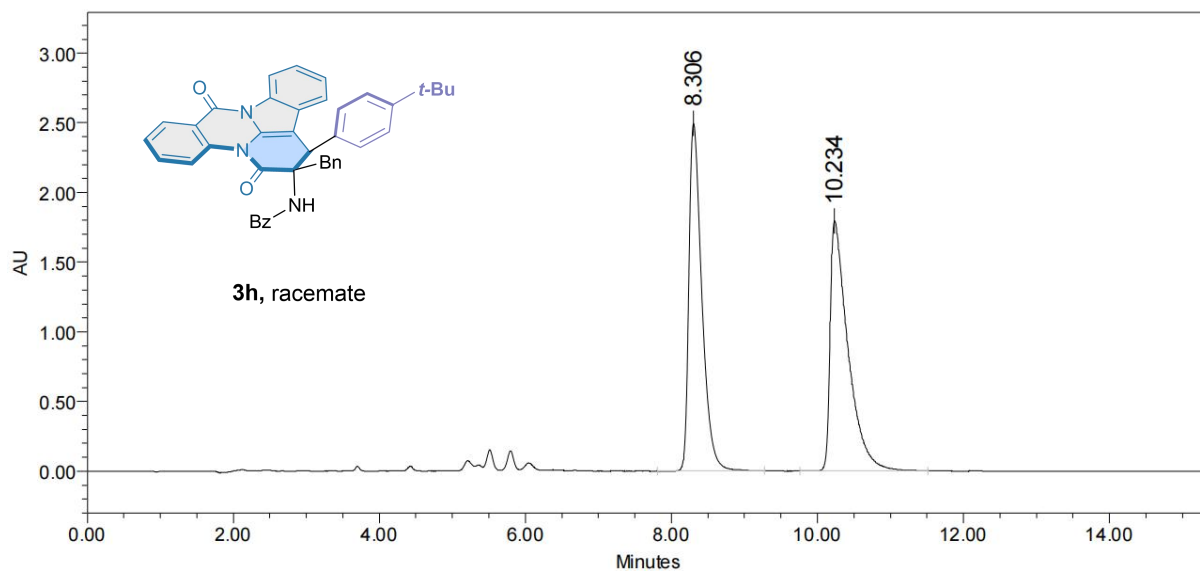

|   | Ret.Time(min) | Height( $\mu$ V) | Area( $\mu$ V*sec) | Rel.Area(%) |
|---|---------------|------------------|--------------------|-------------|
| 1 | 8.306         | 30586947         | 2492657            | 50.04       |
| 2 | 10.234        | 30540258         | 1794065            | 49.96       |

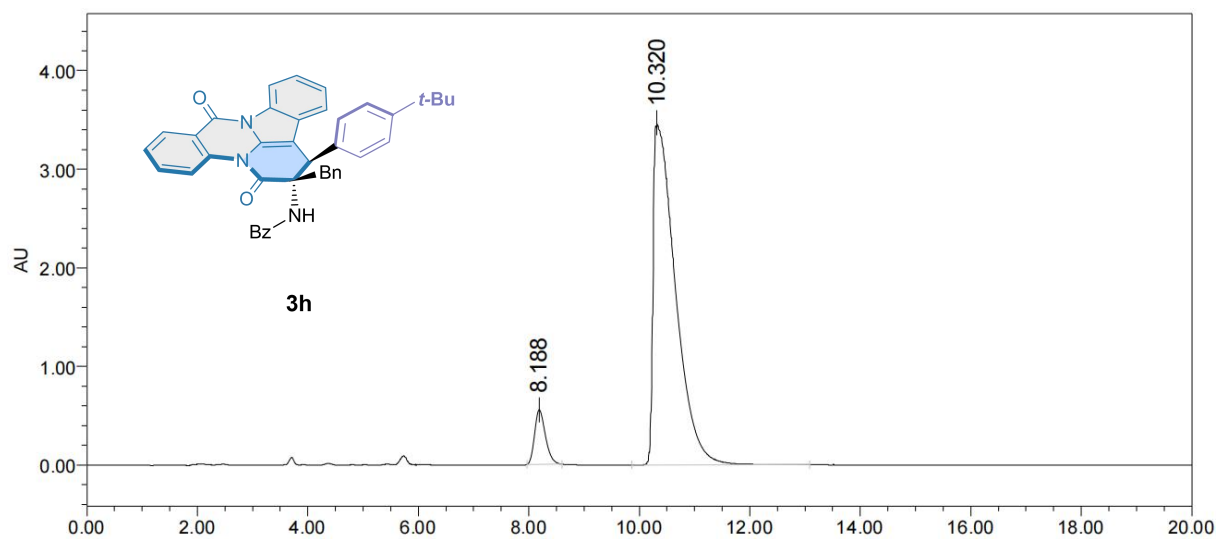

|   | Ret.Time(min) | Height( $\mu$ V) | Area( $\mu$ V*sec) | Rel.Area(%) |
|---|---------------|------------------|--------------------|-------------|
| 1 | 8.188         | 7521568          | 555875             | 7.16        |
| 2 | 10.320        | 97495610         | 3468440            | 92.84       |

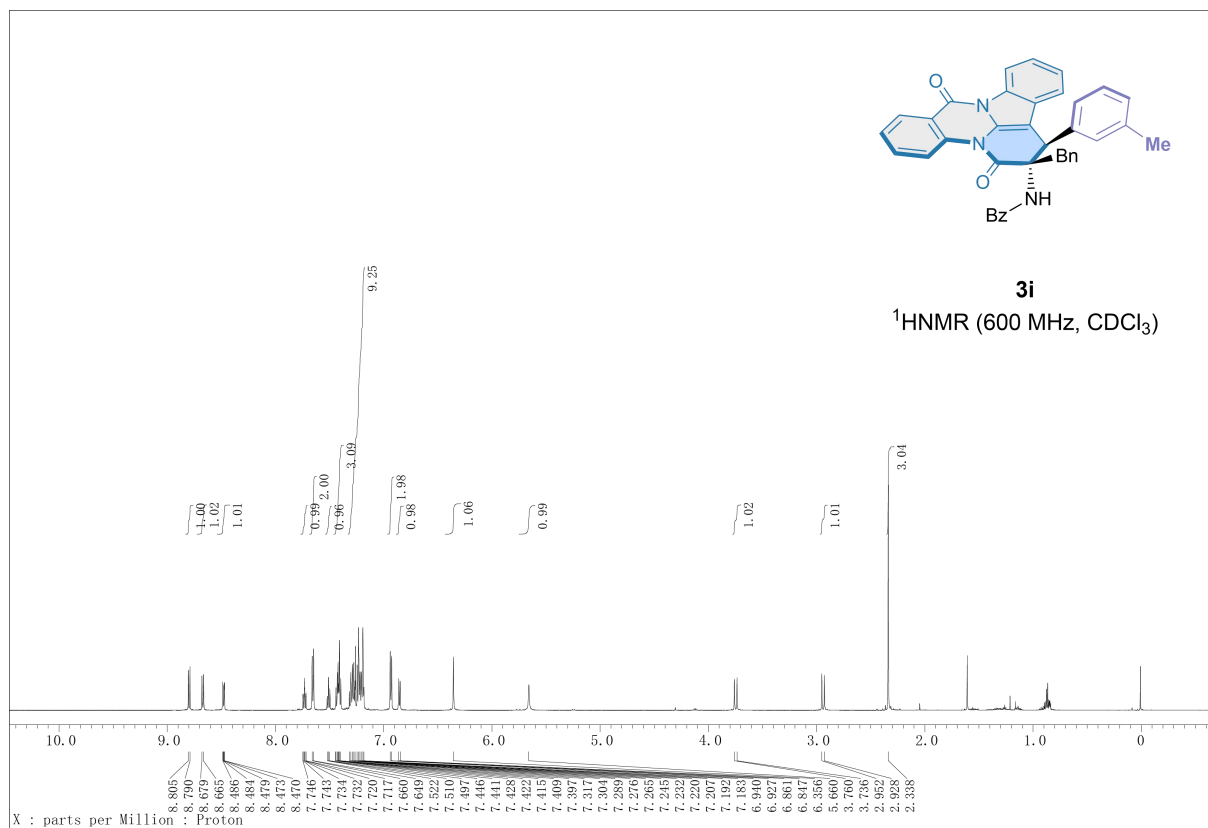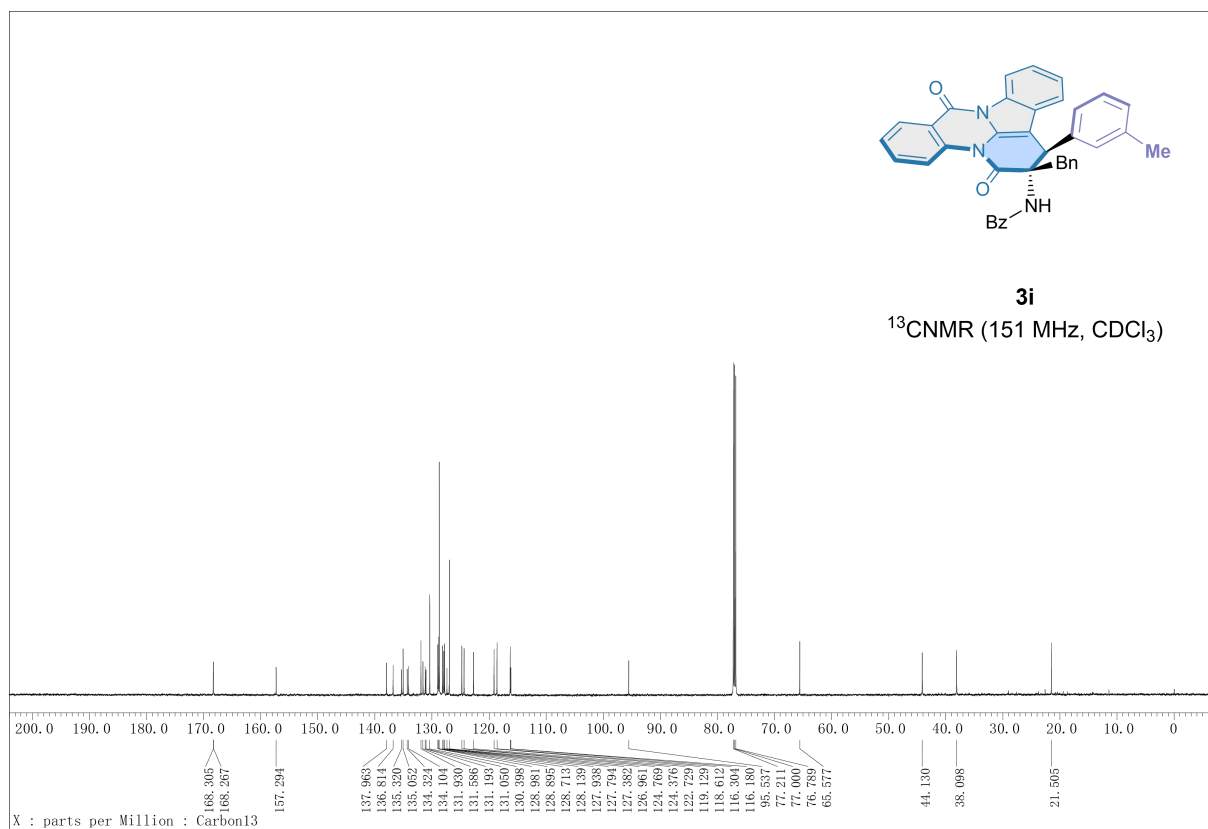

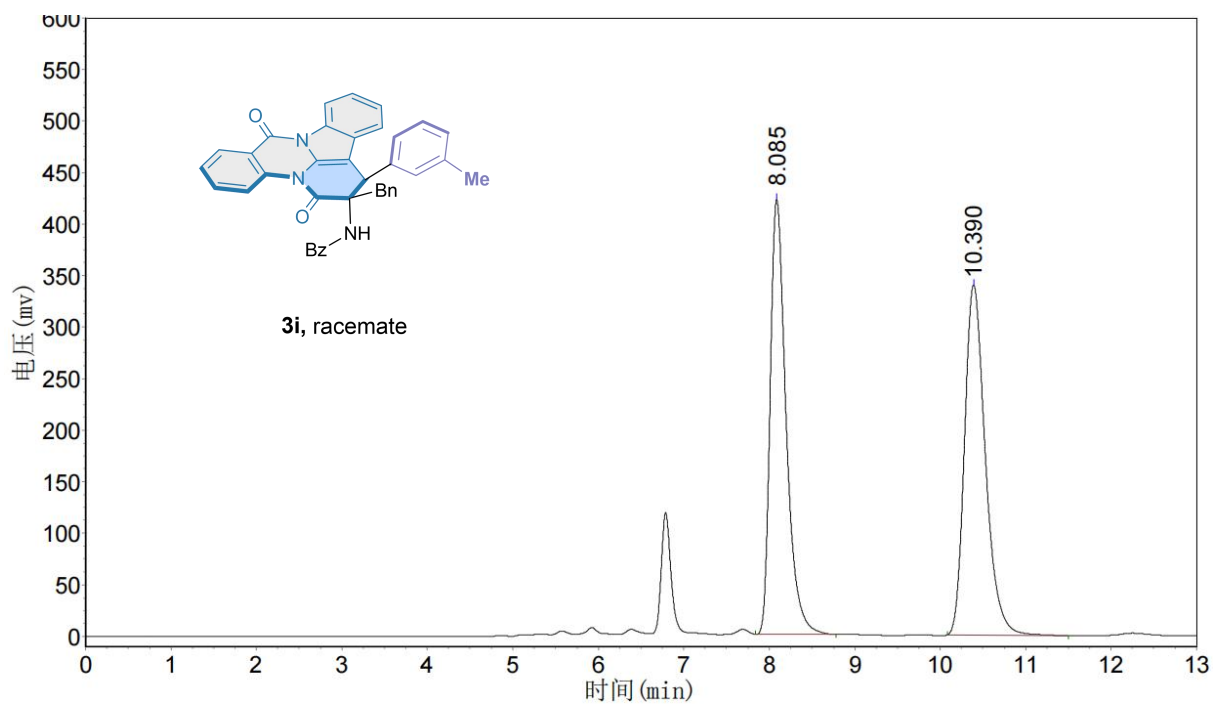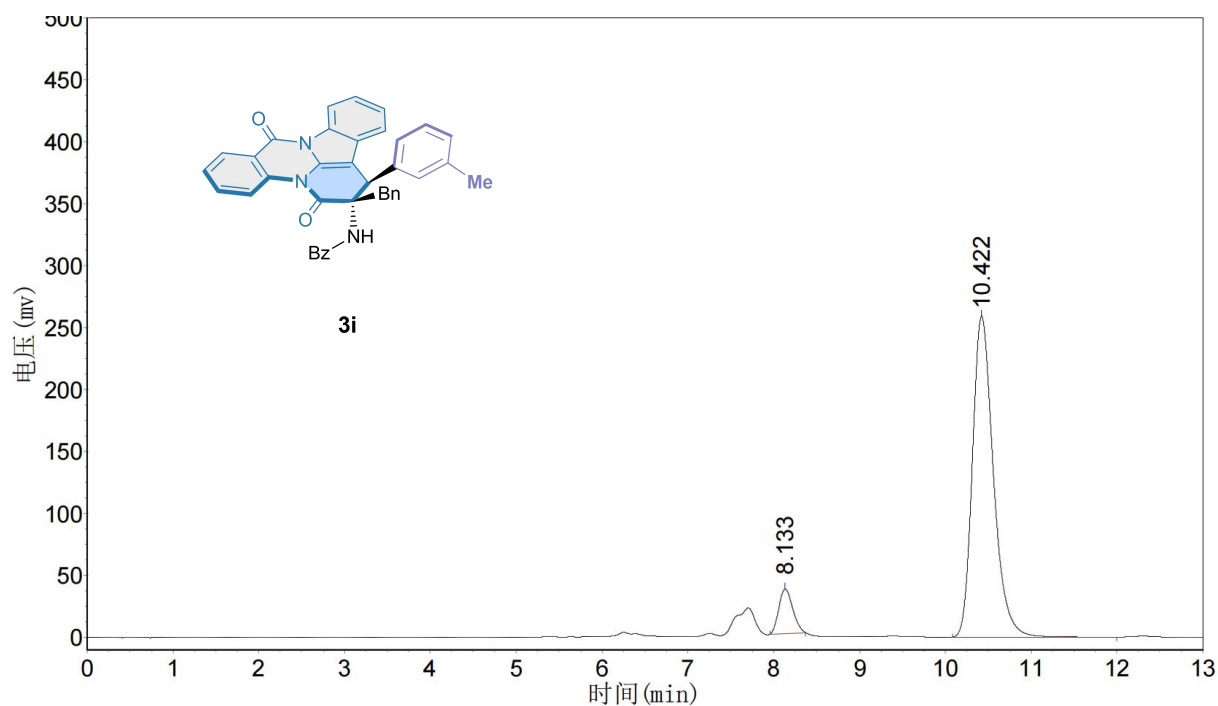

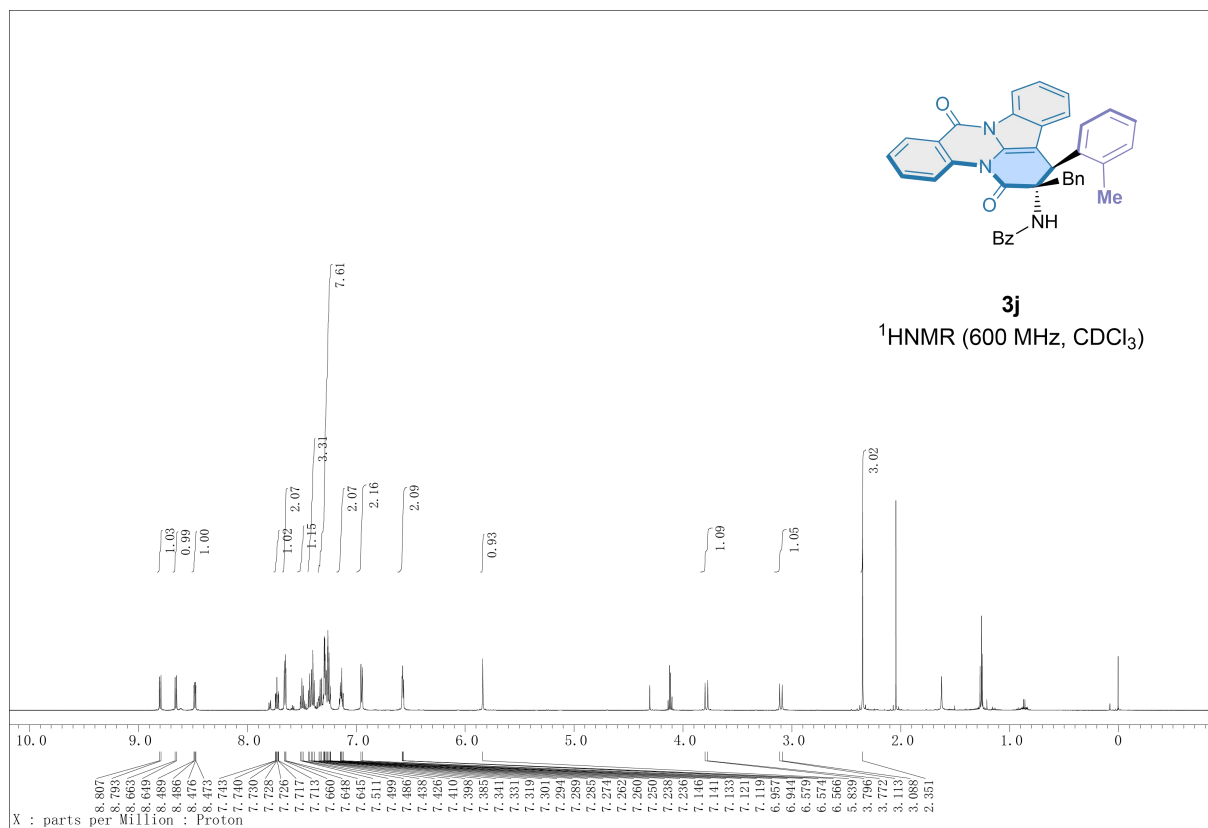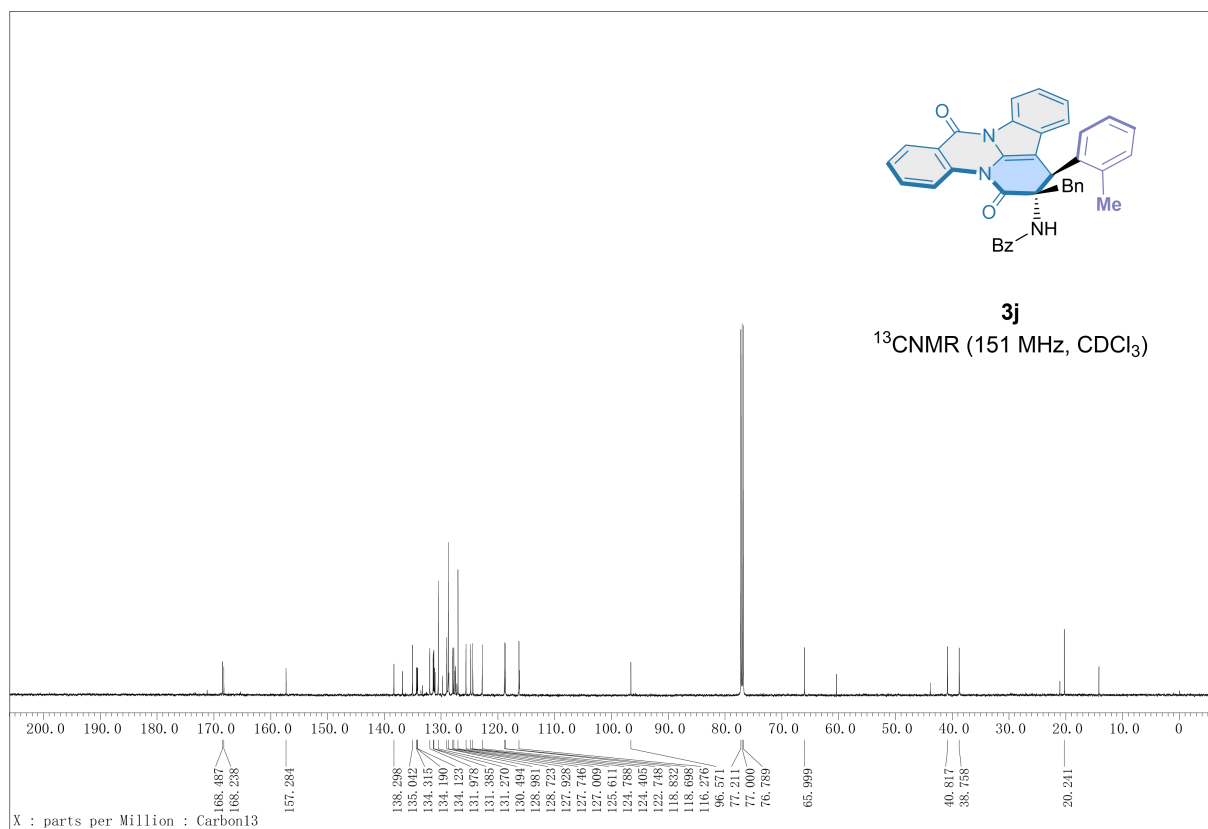

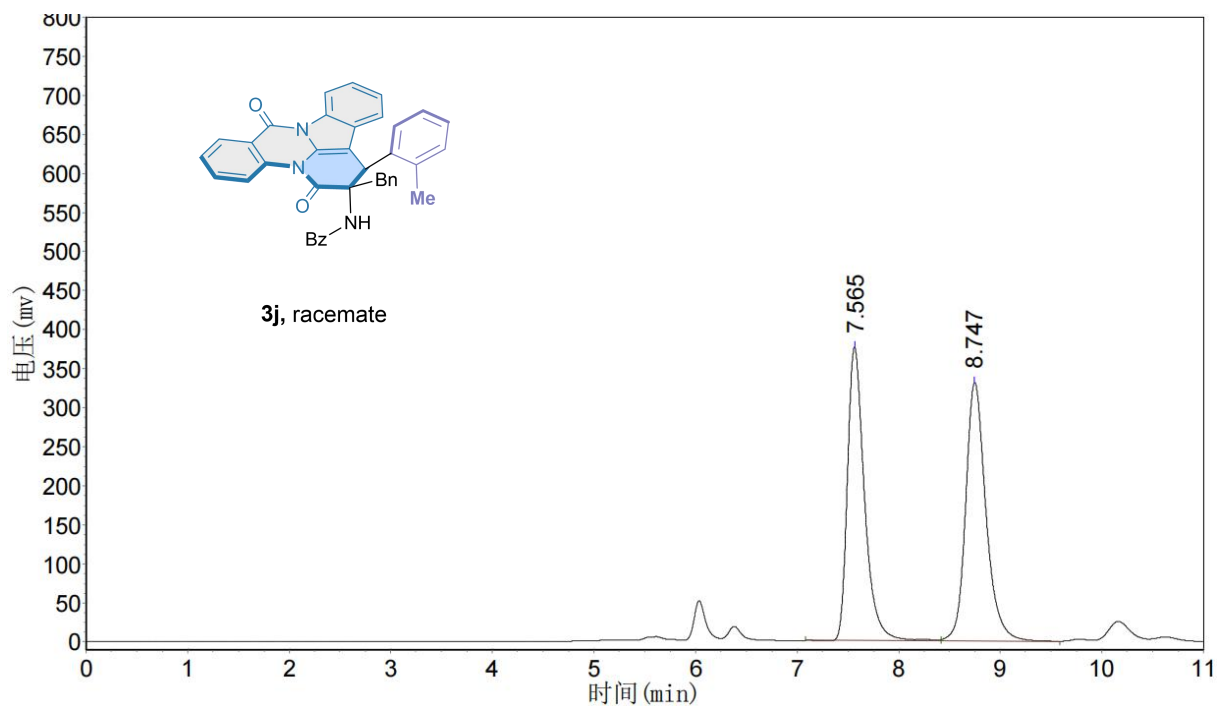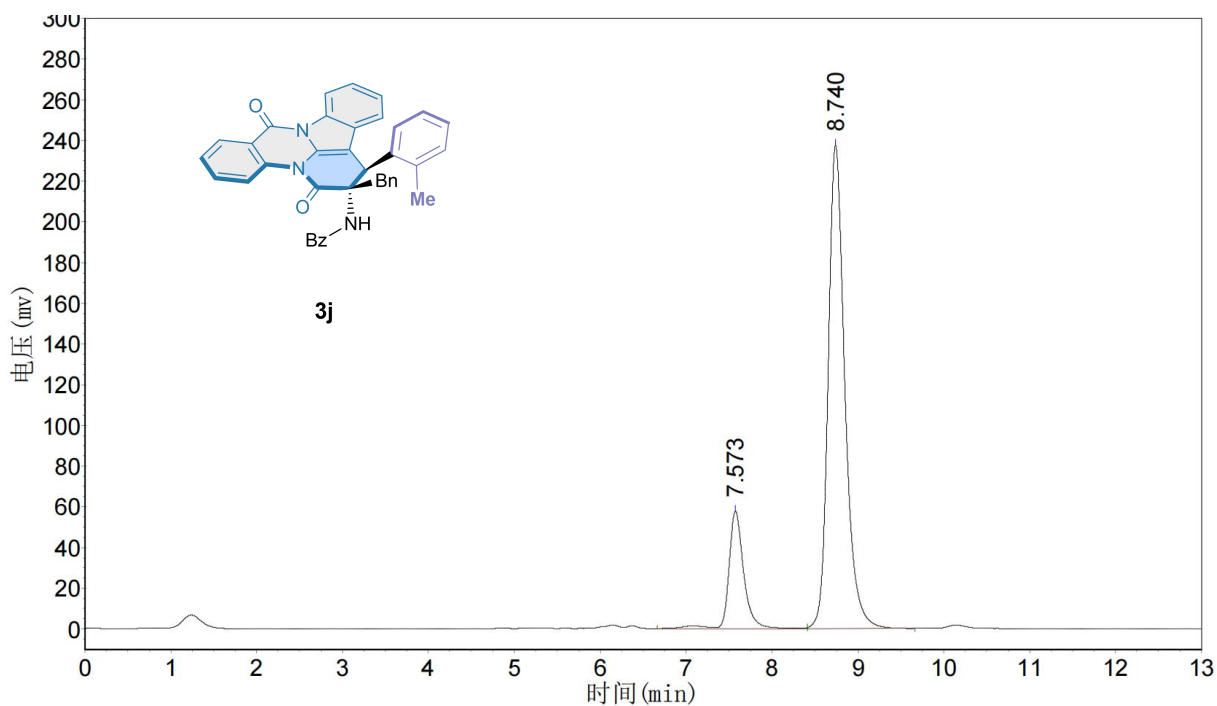

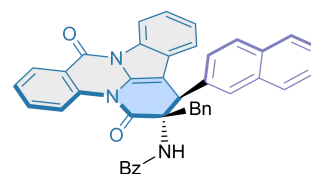

**3k**

$^1\text{H}$ NMR (600 MHz,  $\text{CDCl}_3$ )

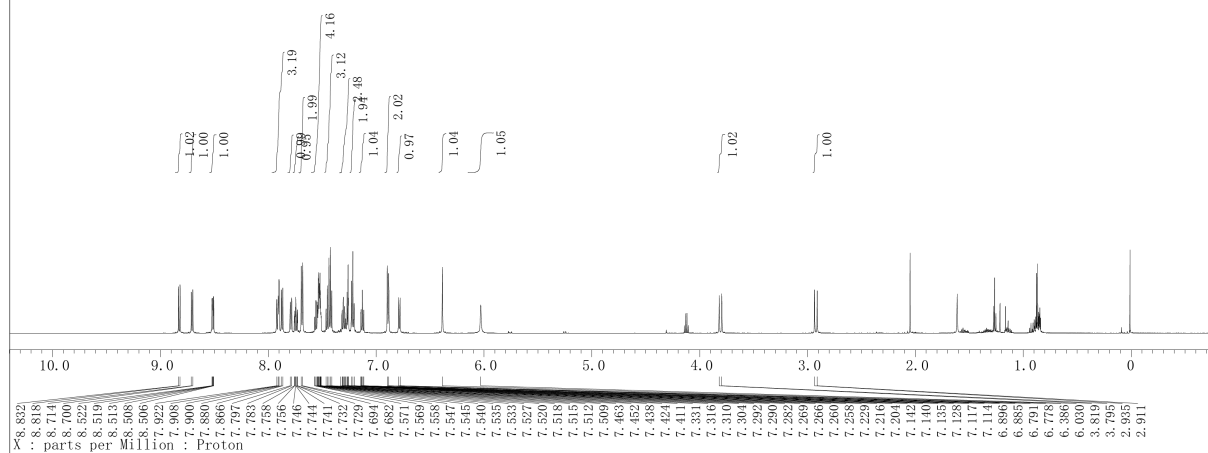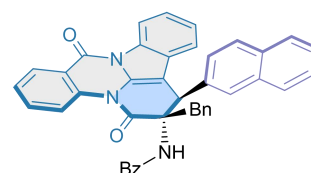

**3k**

$^{13}\text{C}$ NMR (151 MHz,  $\text{CDCl}_3$ )

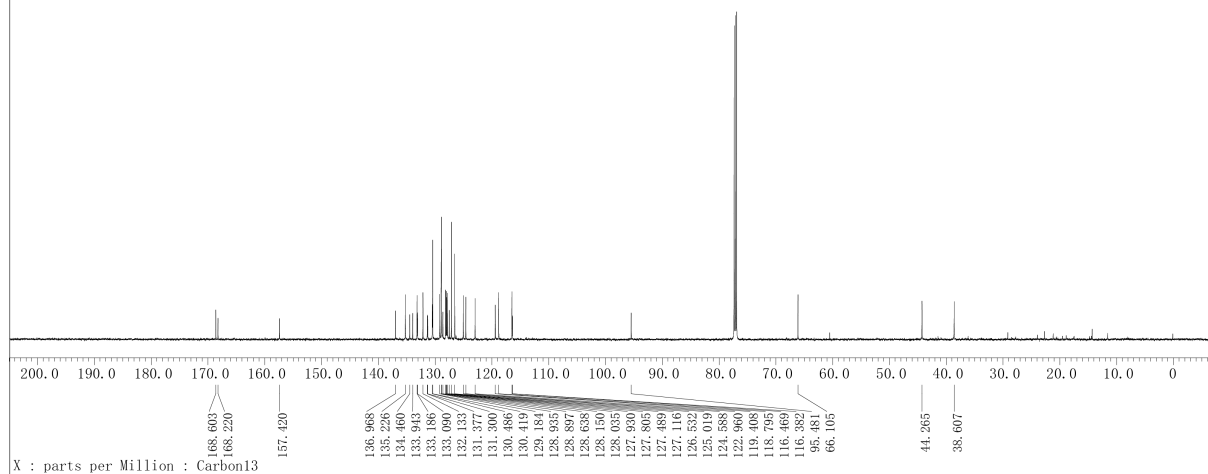



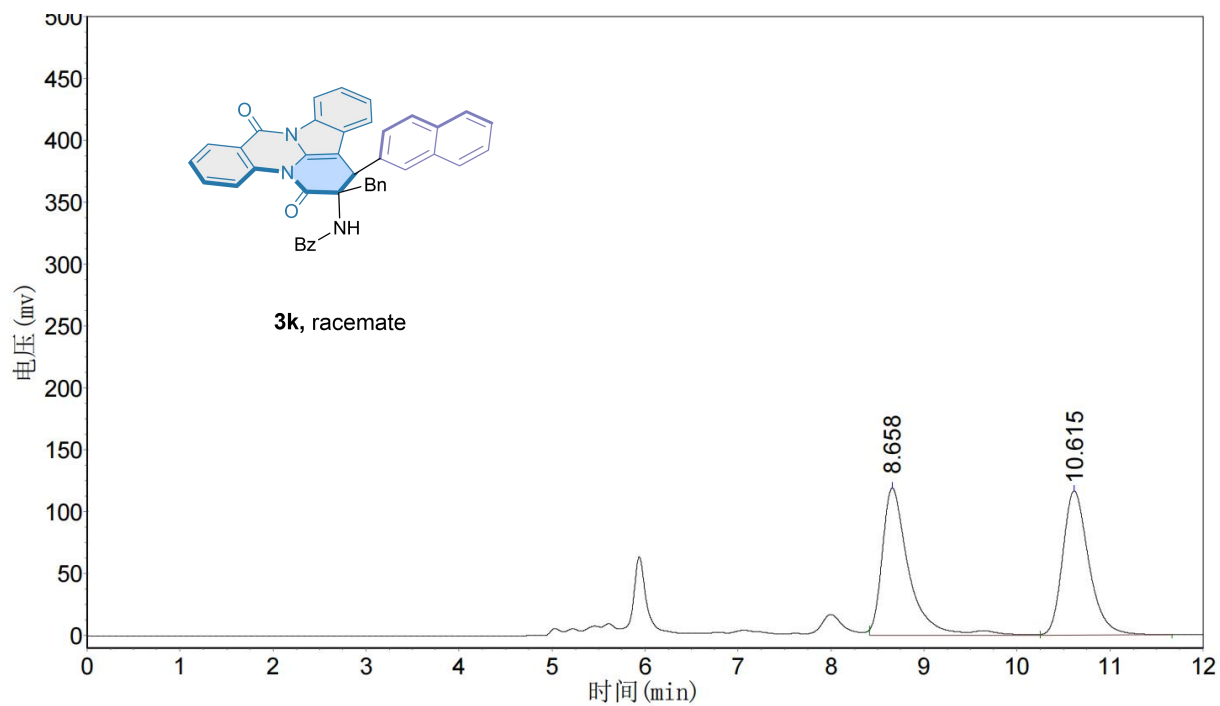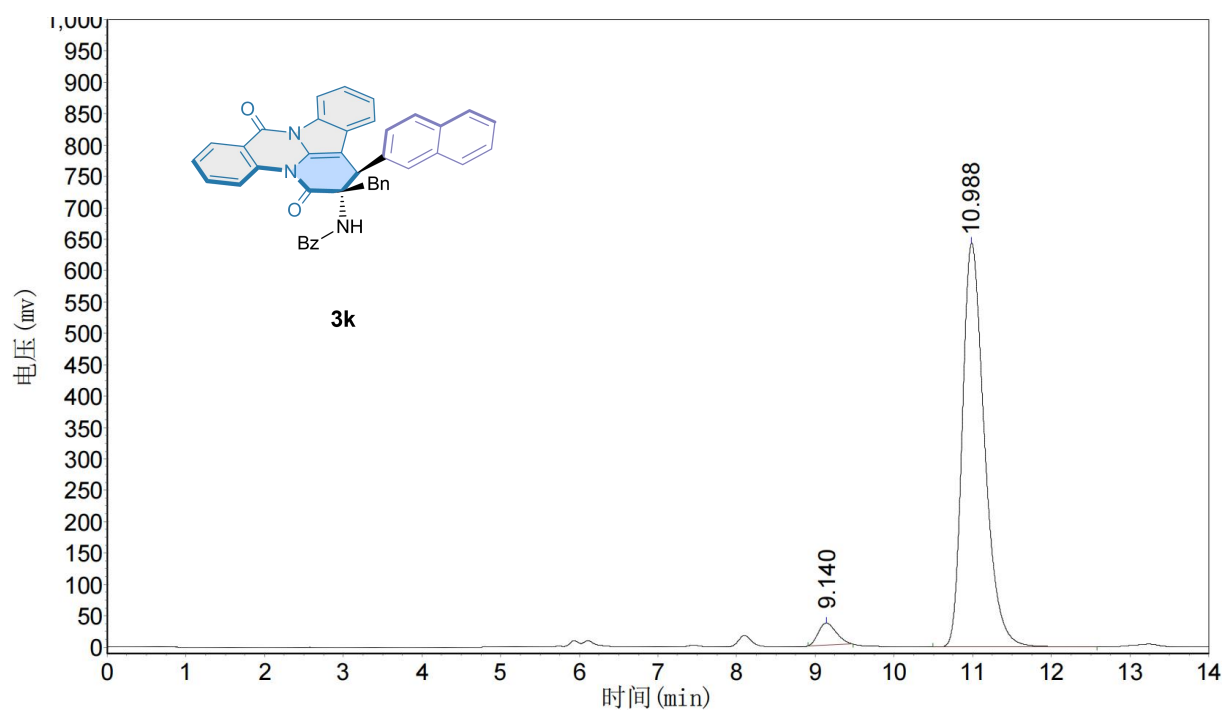

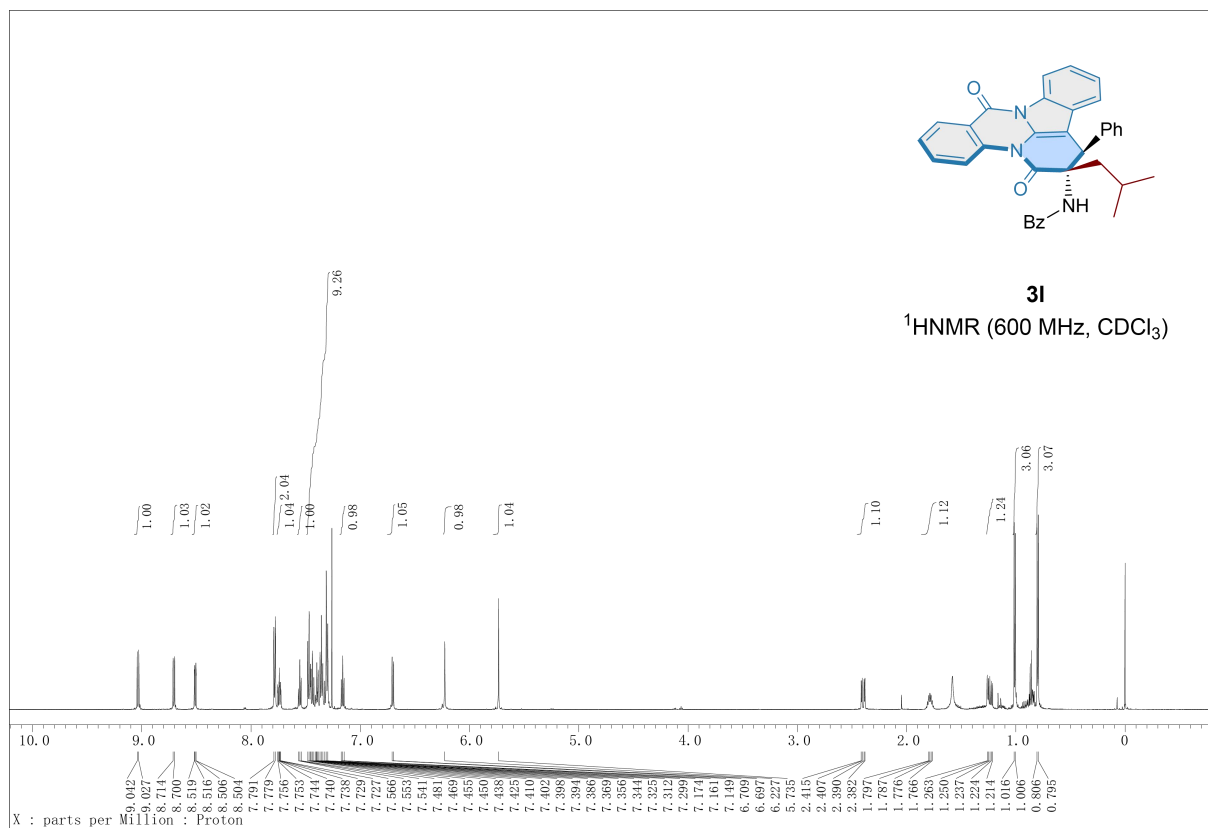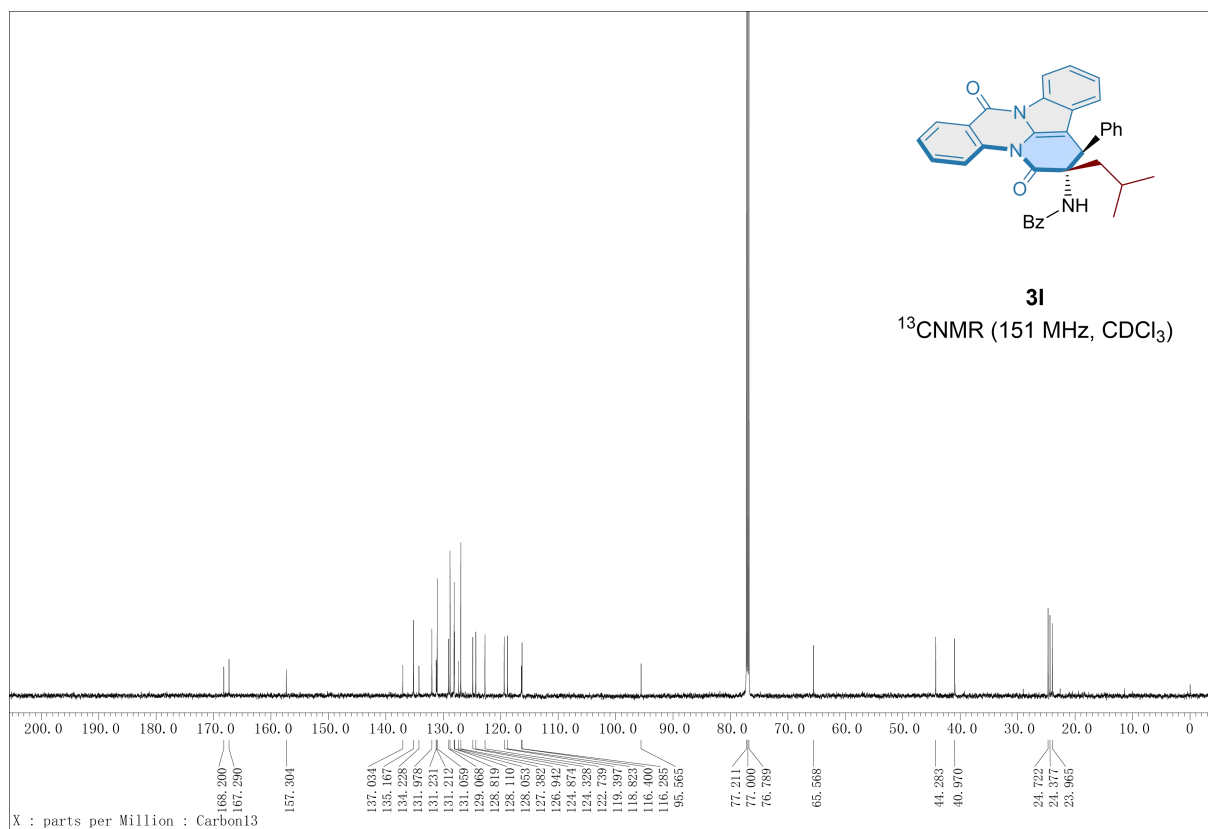

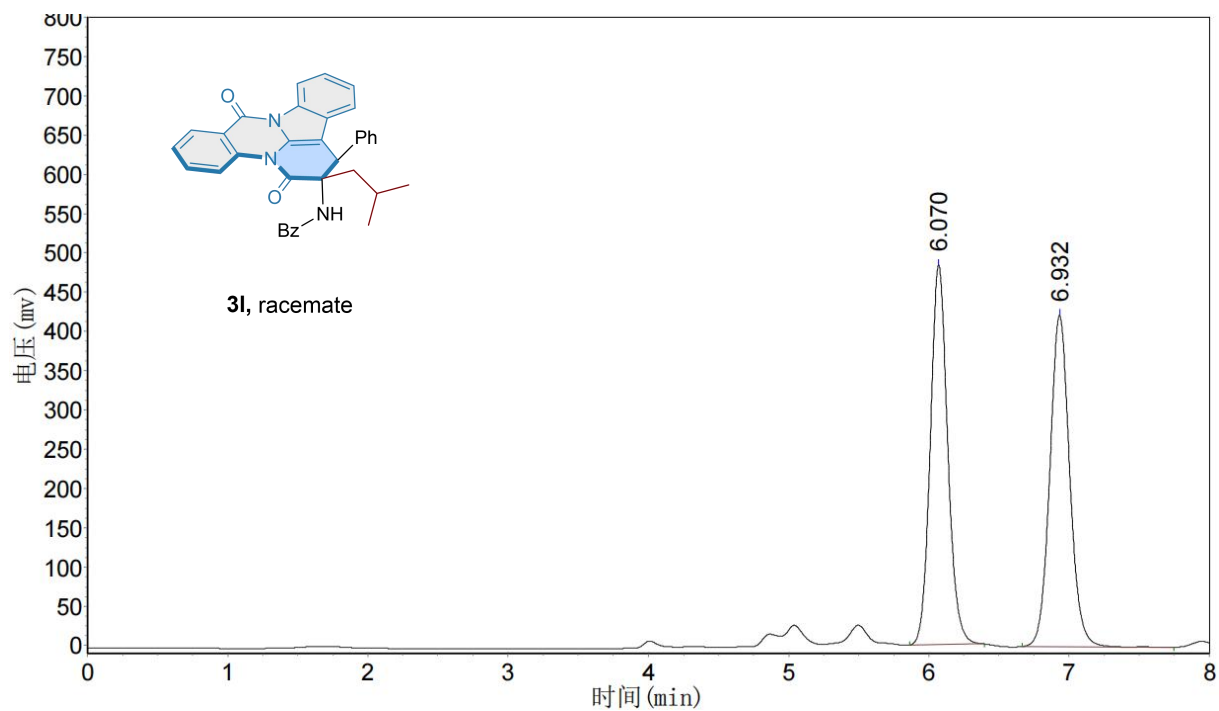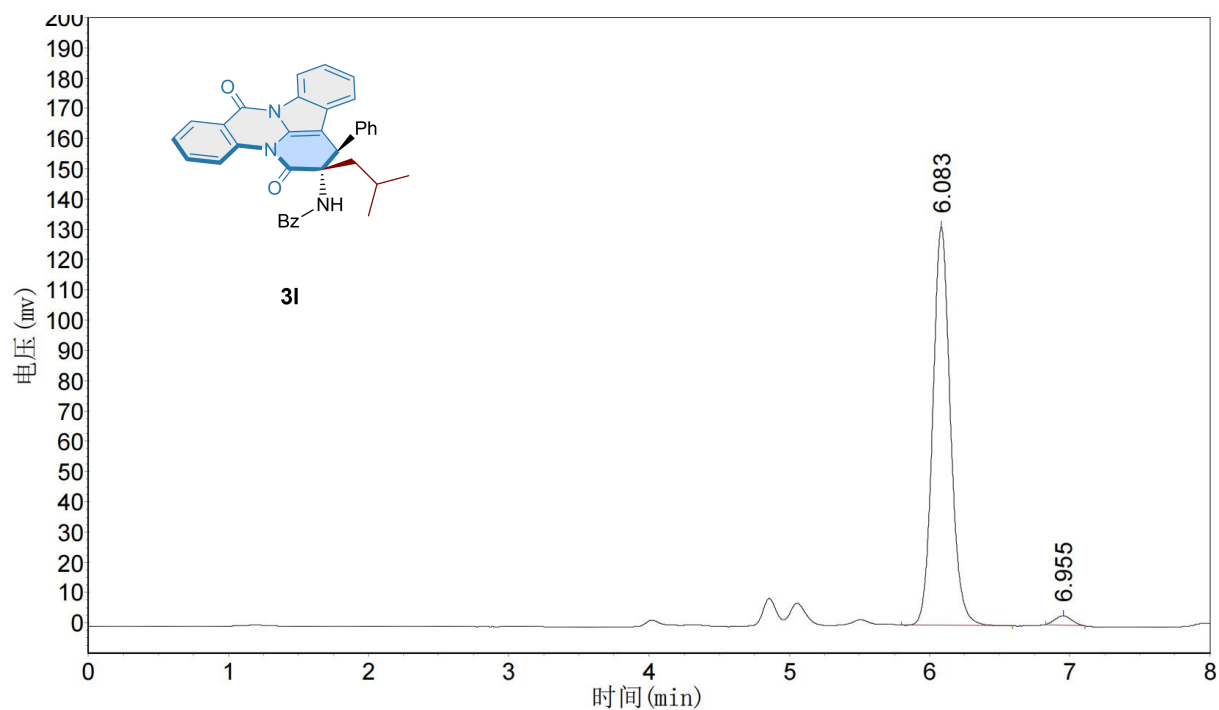

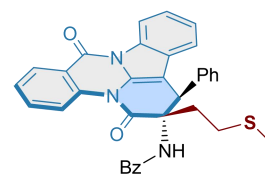

**3m**

$^1\text{H}$ NMR (600 MHz,  $\text{CDCl}_3$ )

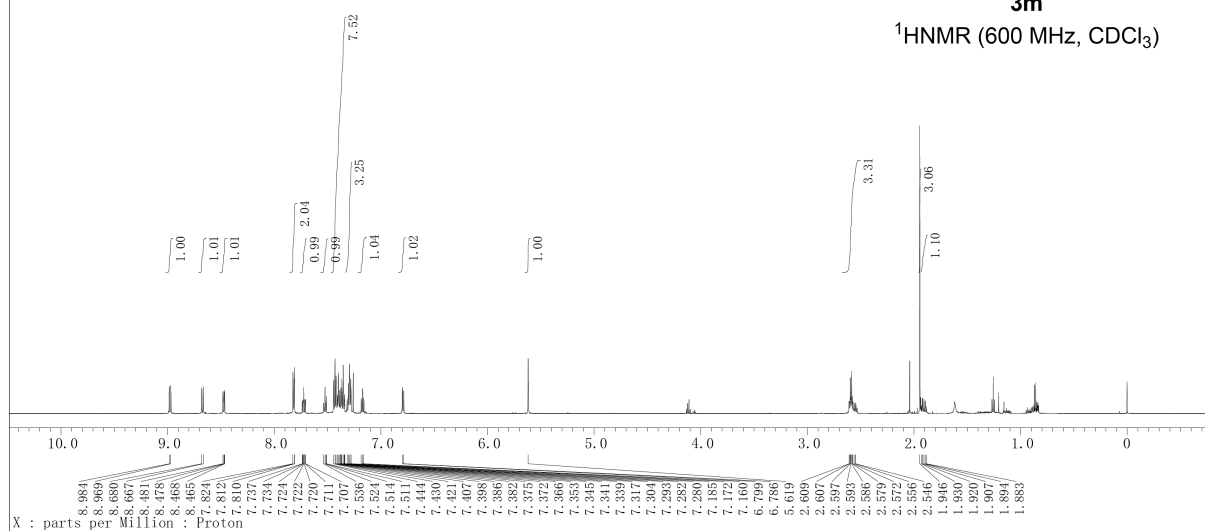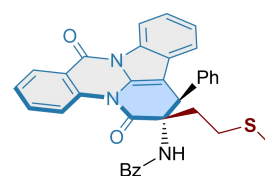

**3m**

$^{13}\text{C}$ NMR (151 MHz,  $\text{CDCl}_3$ )

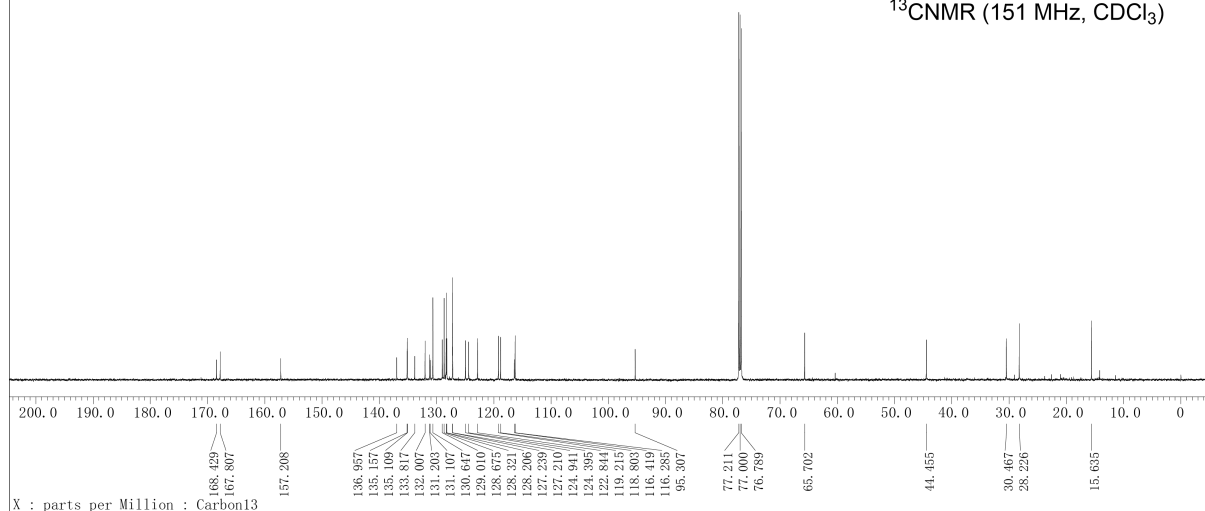

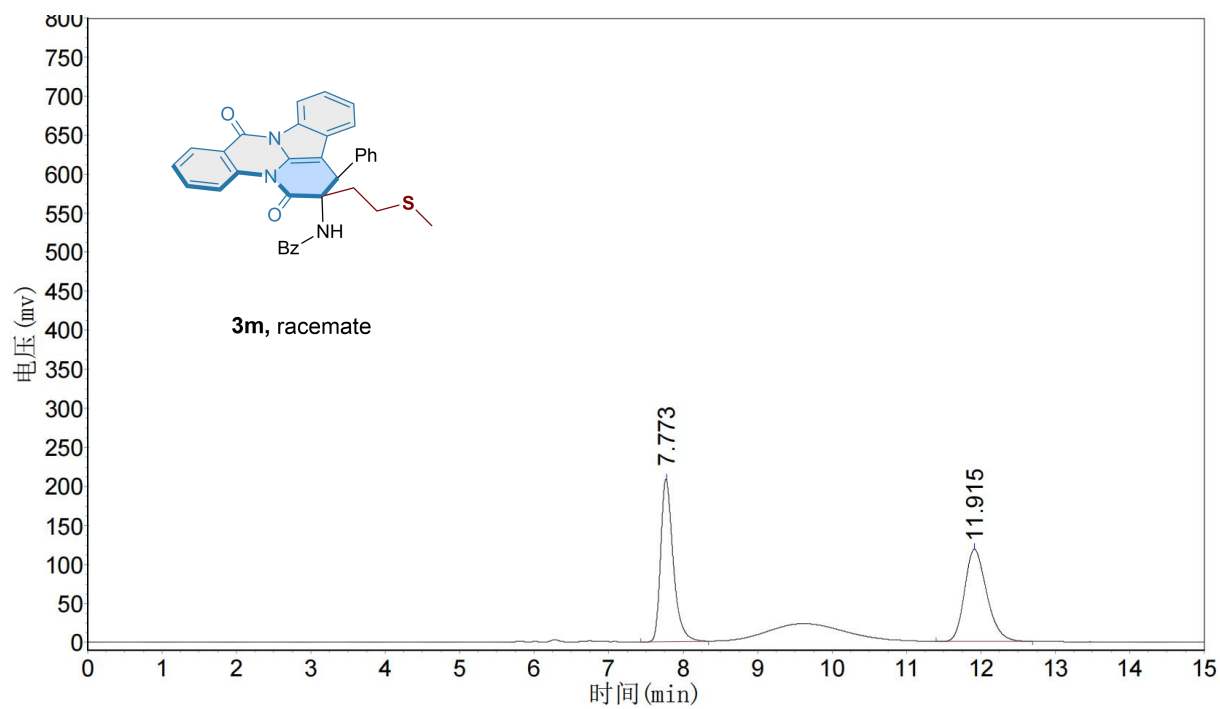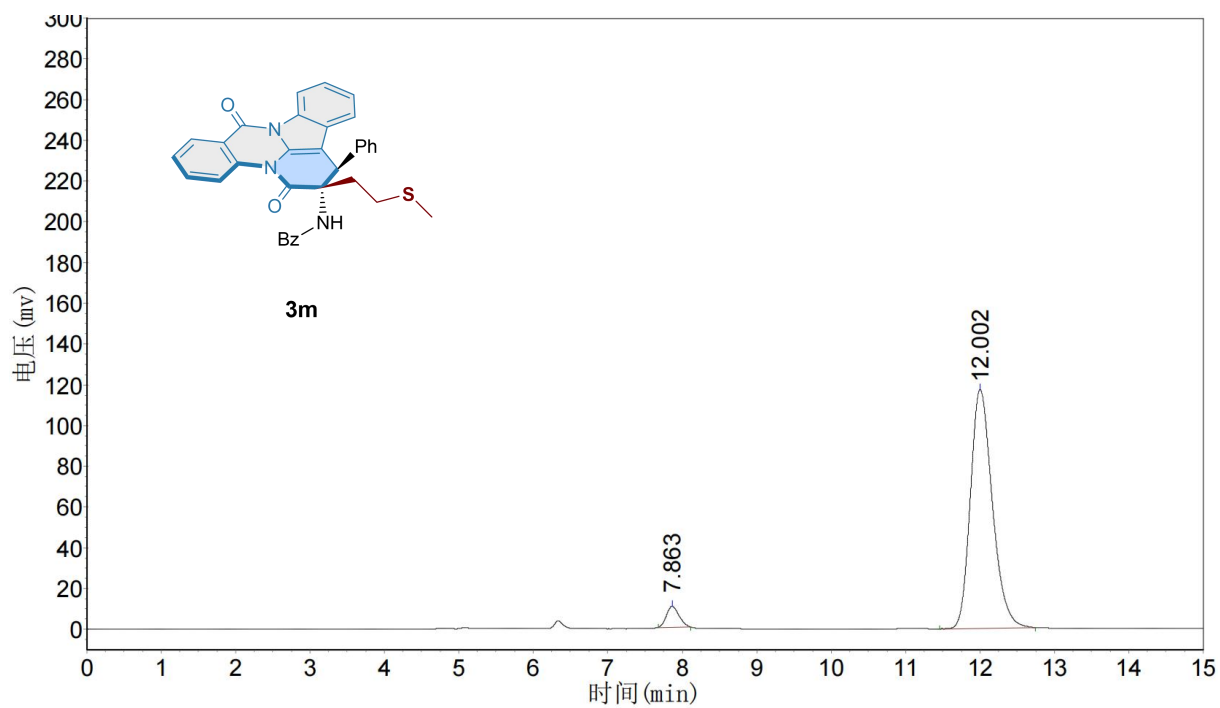

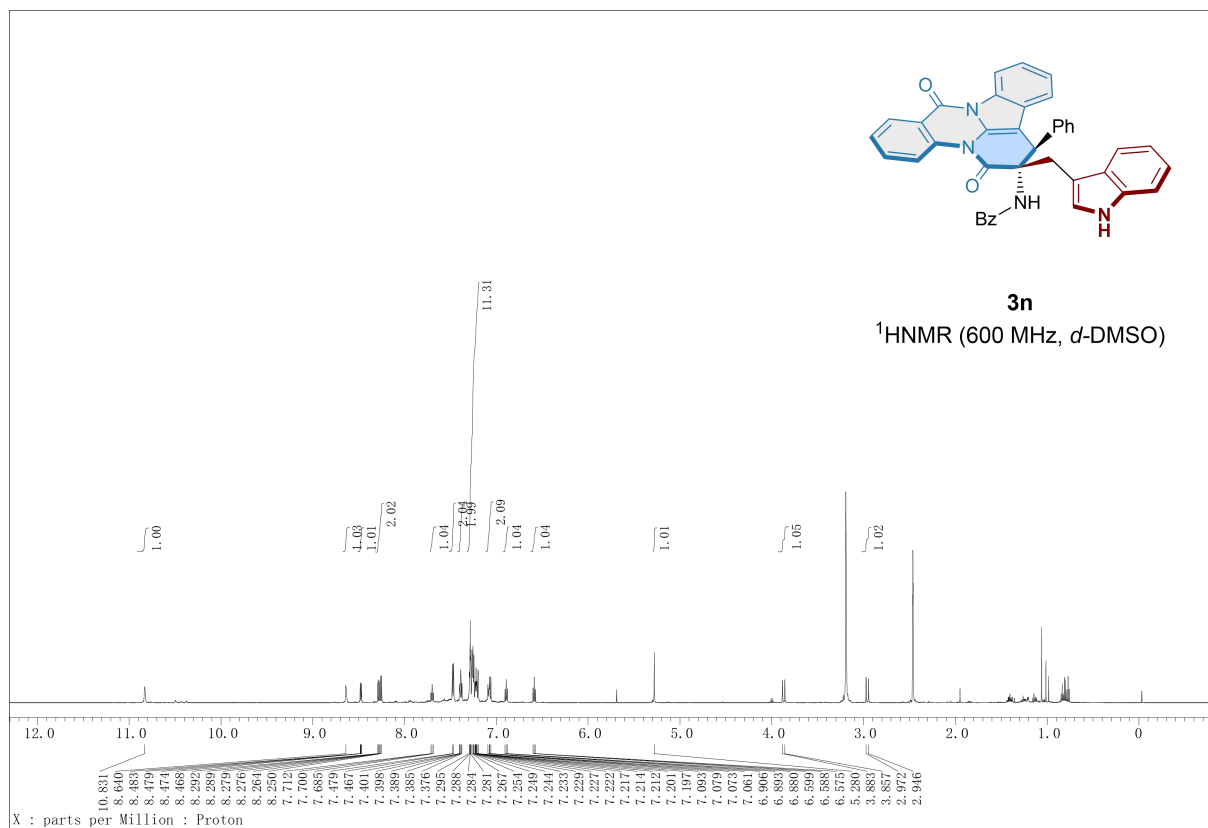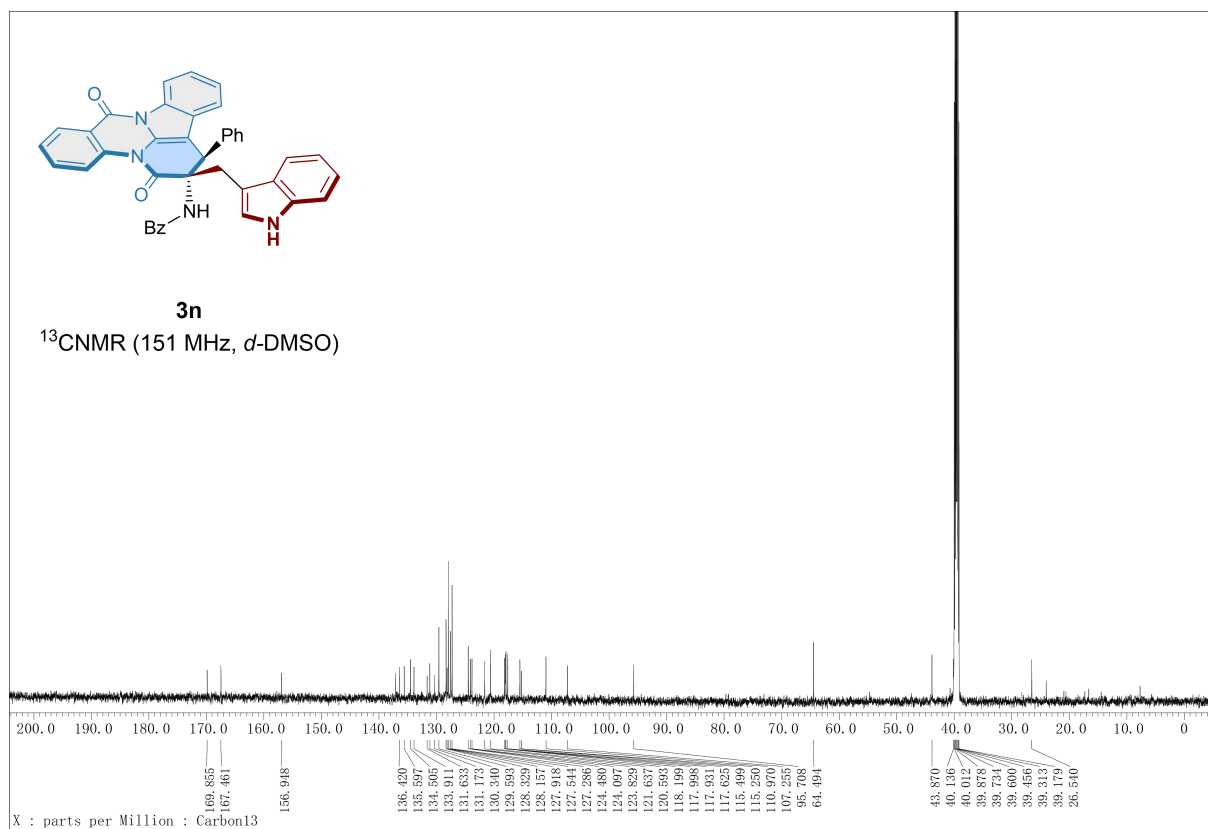

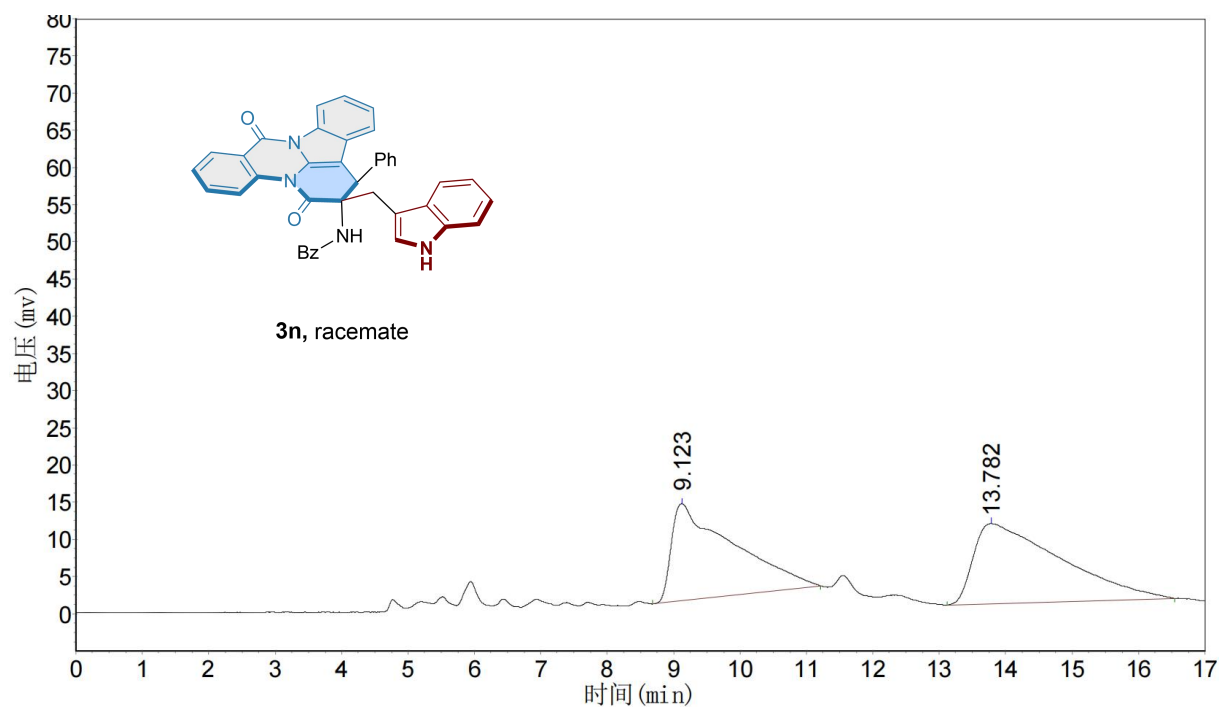

|   | Ret.Time(min) | Height(μV) | Area(μV*sec) | Rel.Area(%) |
|---|---------------|------------|--------------|-------------|
| 1 | 9.123         | 13063      | 836489       | 46.14       |
| 2 | 13.782        | 10773      | 976424       | 53.86       |

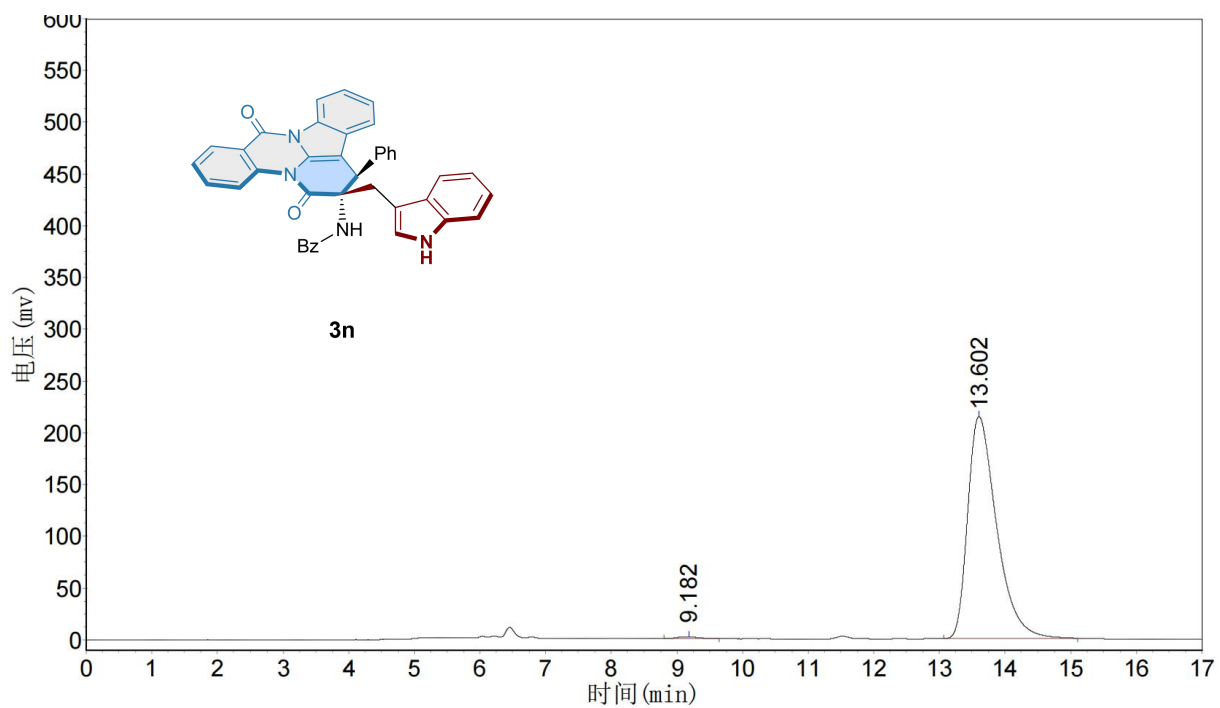

|   | Ret.Time(min) | Height(μV) | Area(μV*sec) | Rel.Area(%) |
|---|---------------|------------|--------------|-------------|
| 1 | 9.182         | 1709       | 37961        | 0.58        |
| 2 | 13.602        | 214478     | 6560855      | 99.42       |

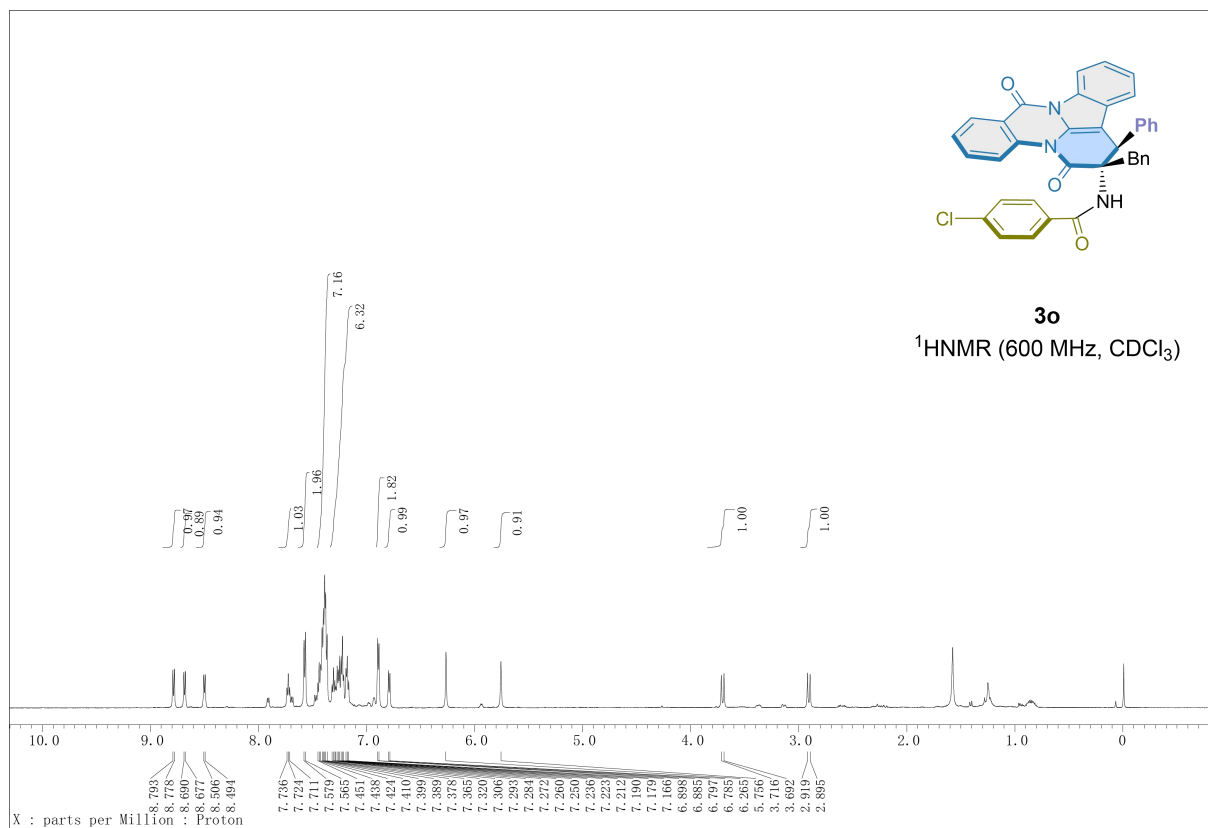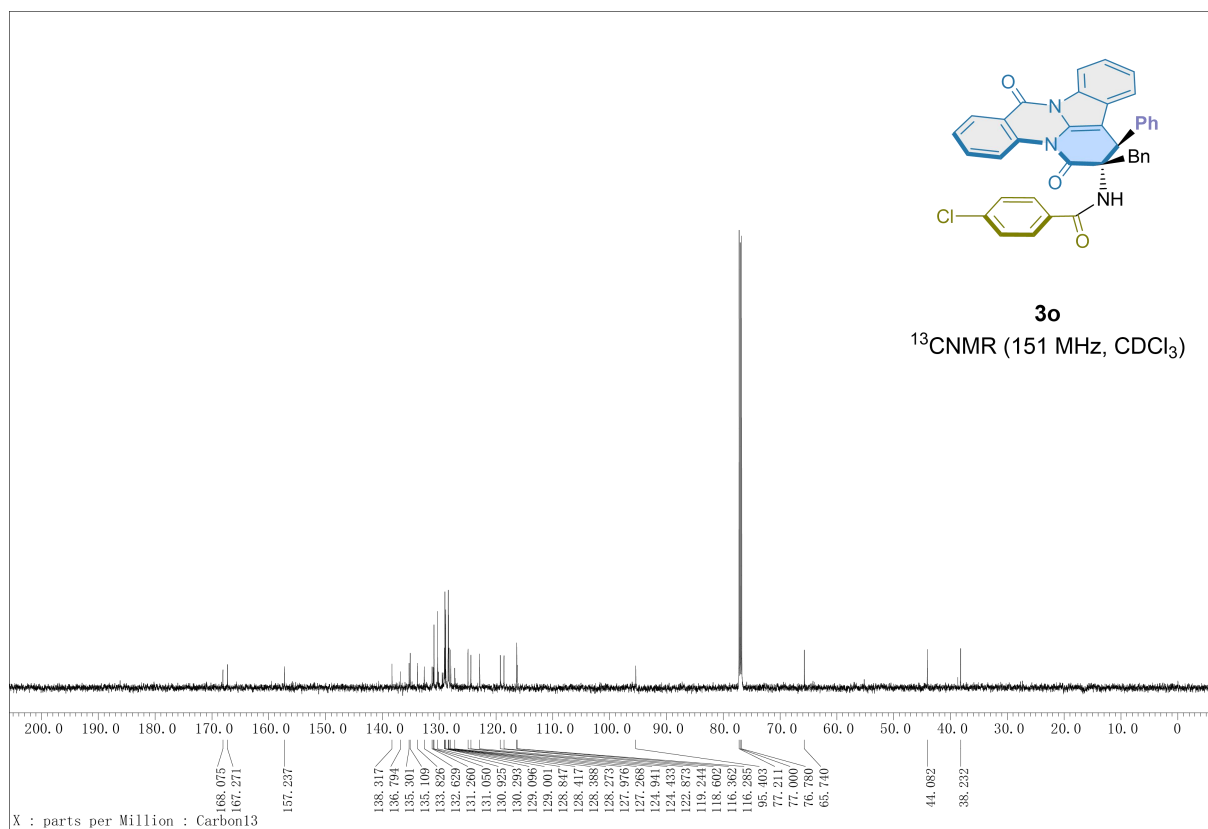



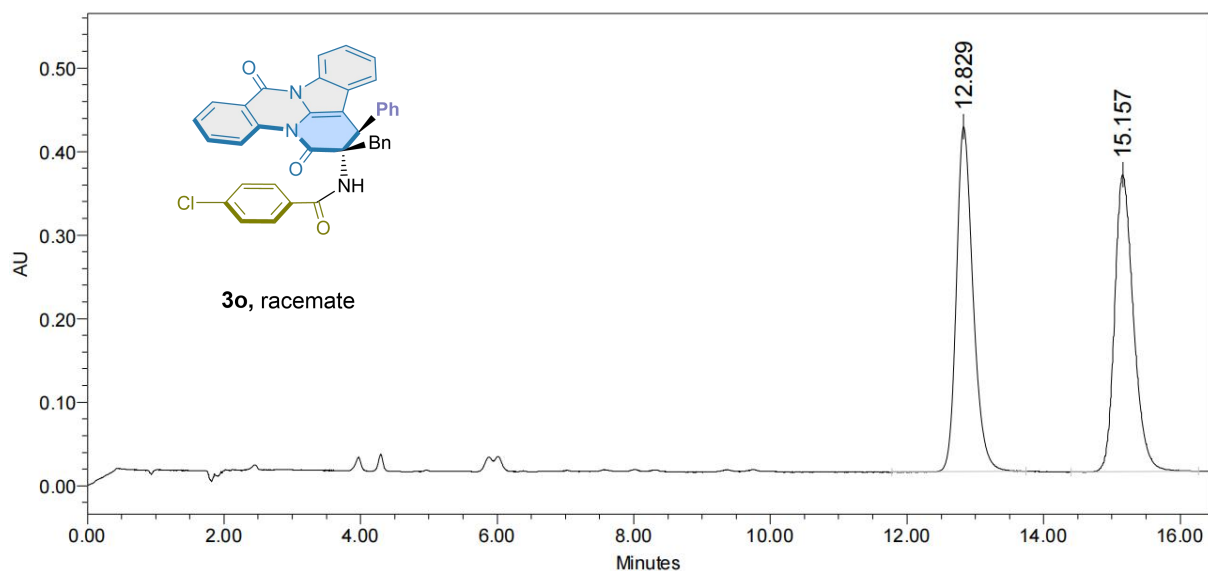

|   | Ret.Time(min) | Height(μV) | Area(μV*sec) | Rel.Area(%) |
|---|---------------|------------|--------------|-------------|
| 1 | 12.829        | 412639     | 6977084      | 50.53       |
| 2 | 15.157        | 355153     | 6829449      | 49.47       |

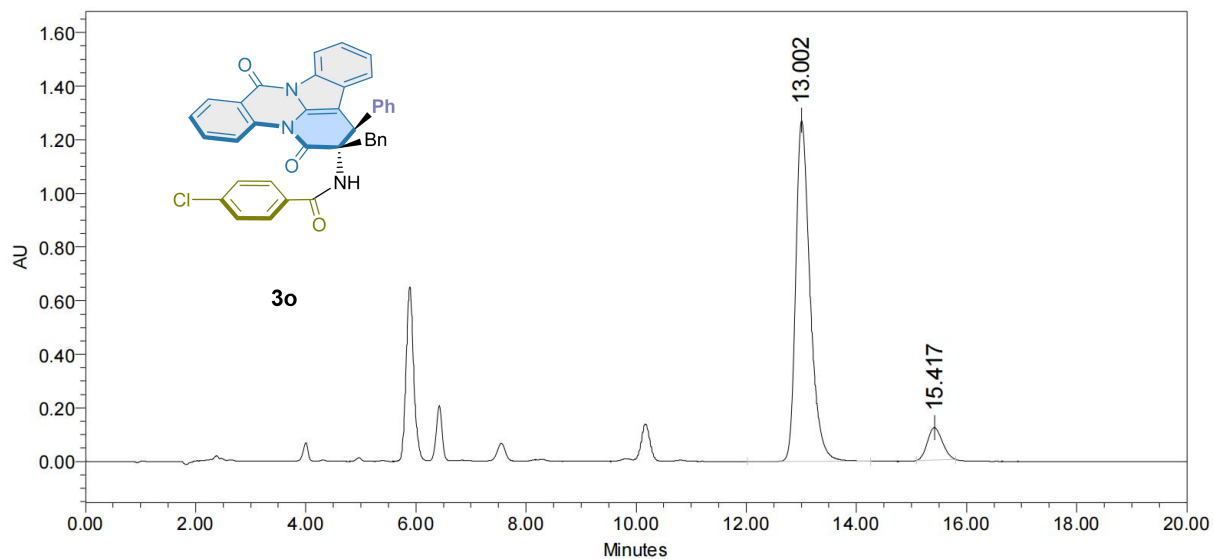

|   | Ret.Time(min) | Height(μV) | Area(μV*sec) | Rel.Area(%) |
|---|---------------|------------|--------------|-------------|
| 1 | 13.002        | 1271703    | 22913929     | 91.01       |
| 2 | 15.417        | 120894     | 2264040      | 8.99        |

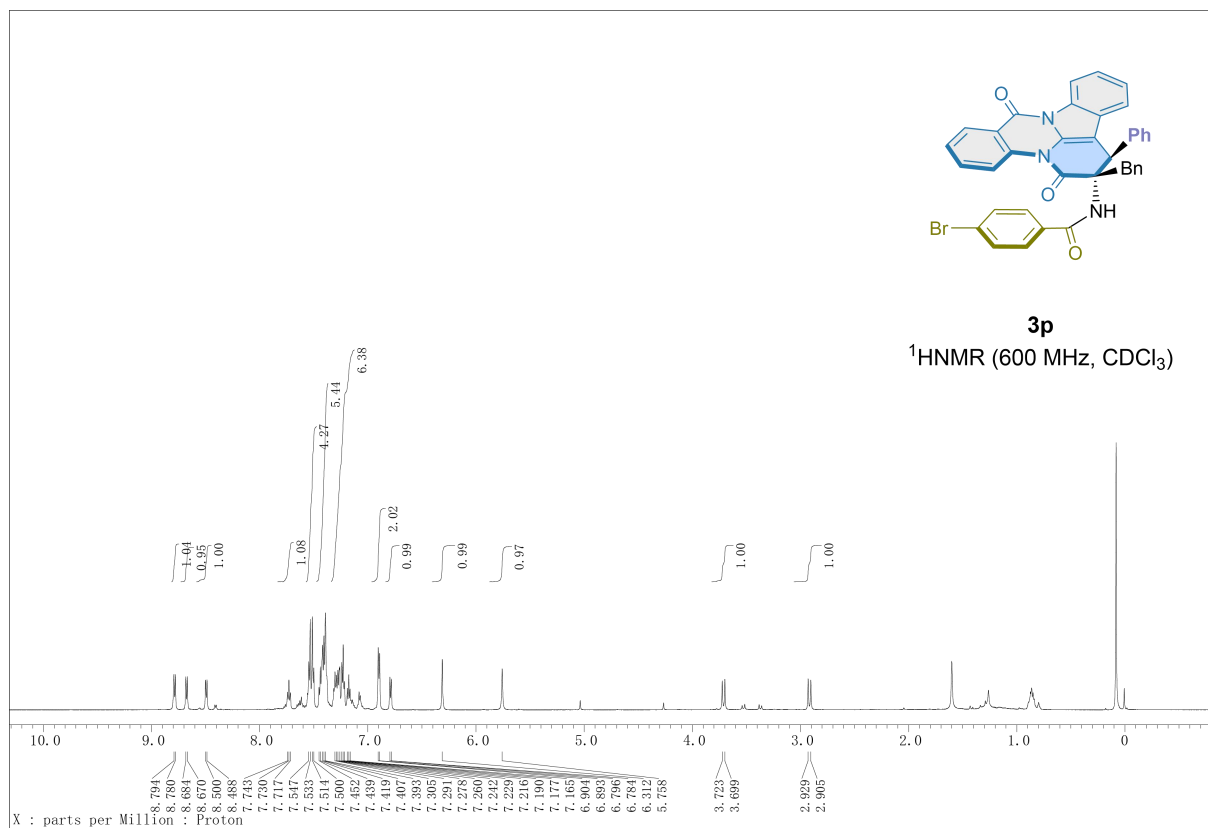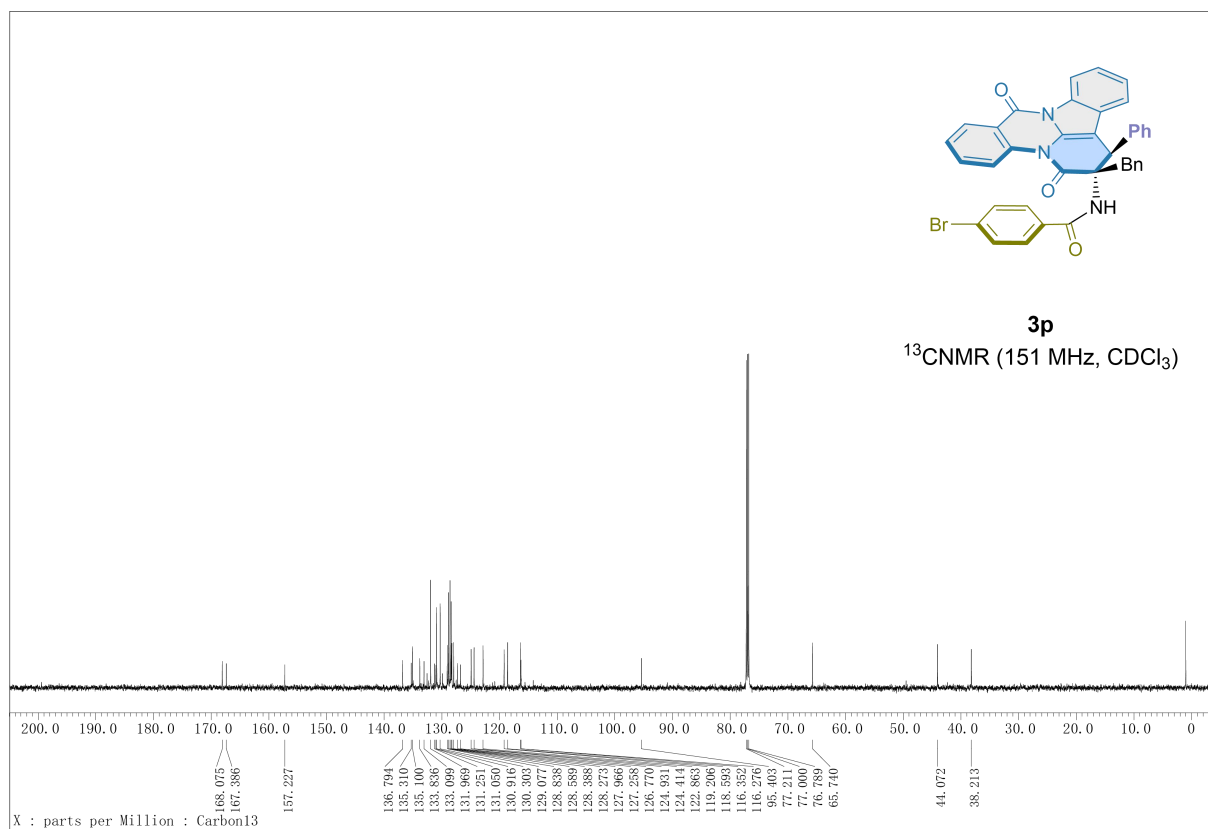

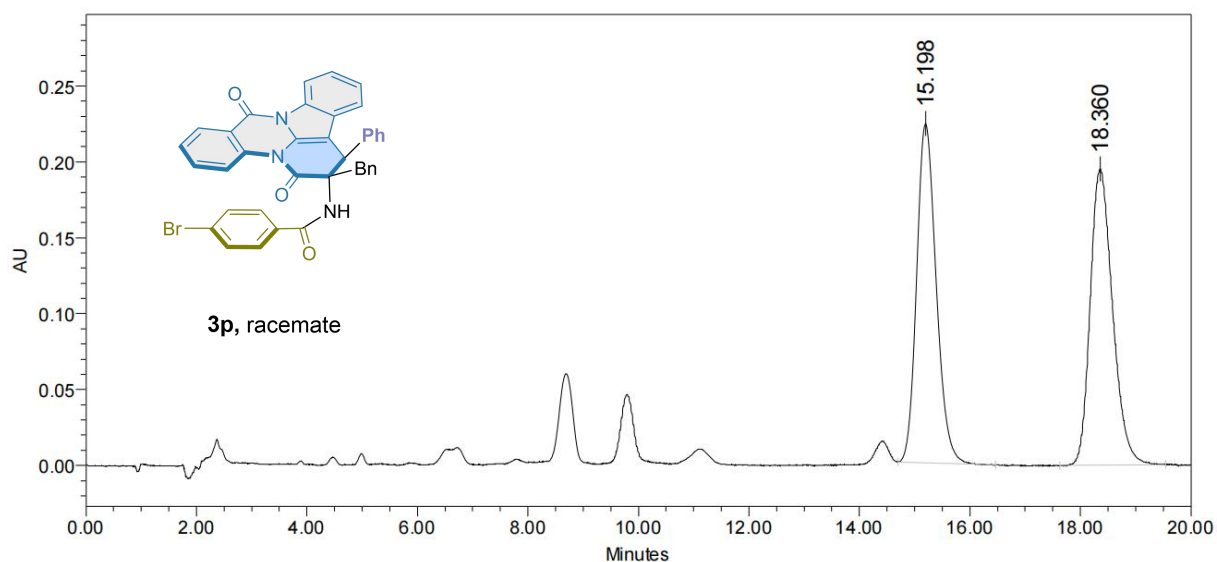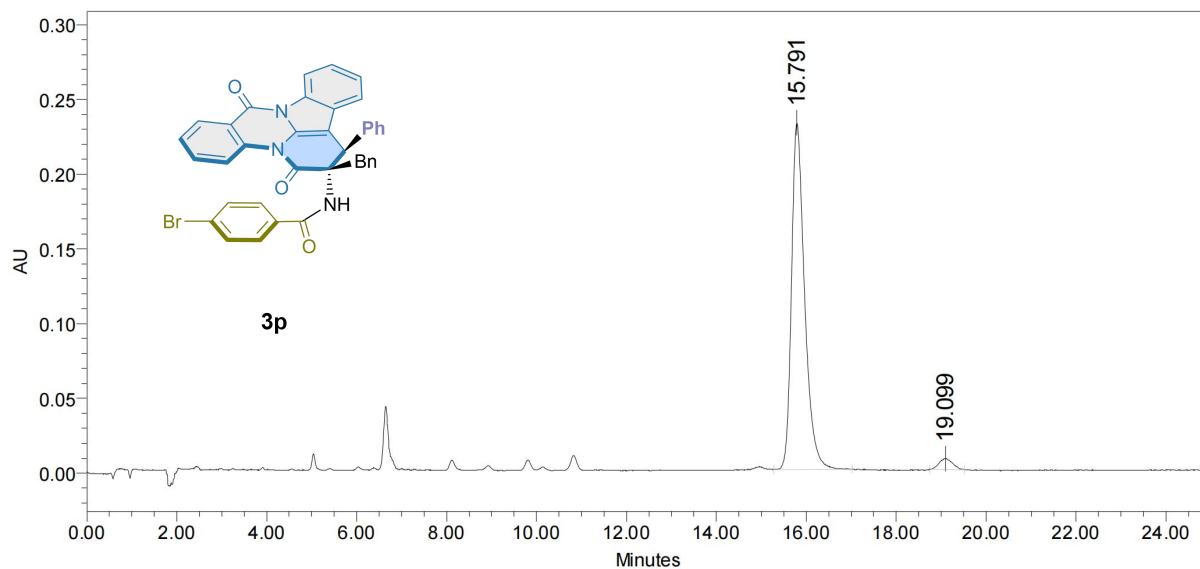

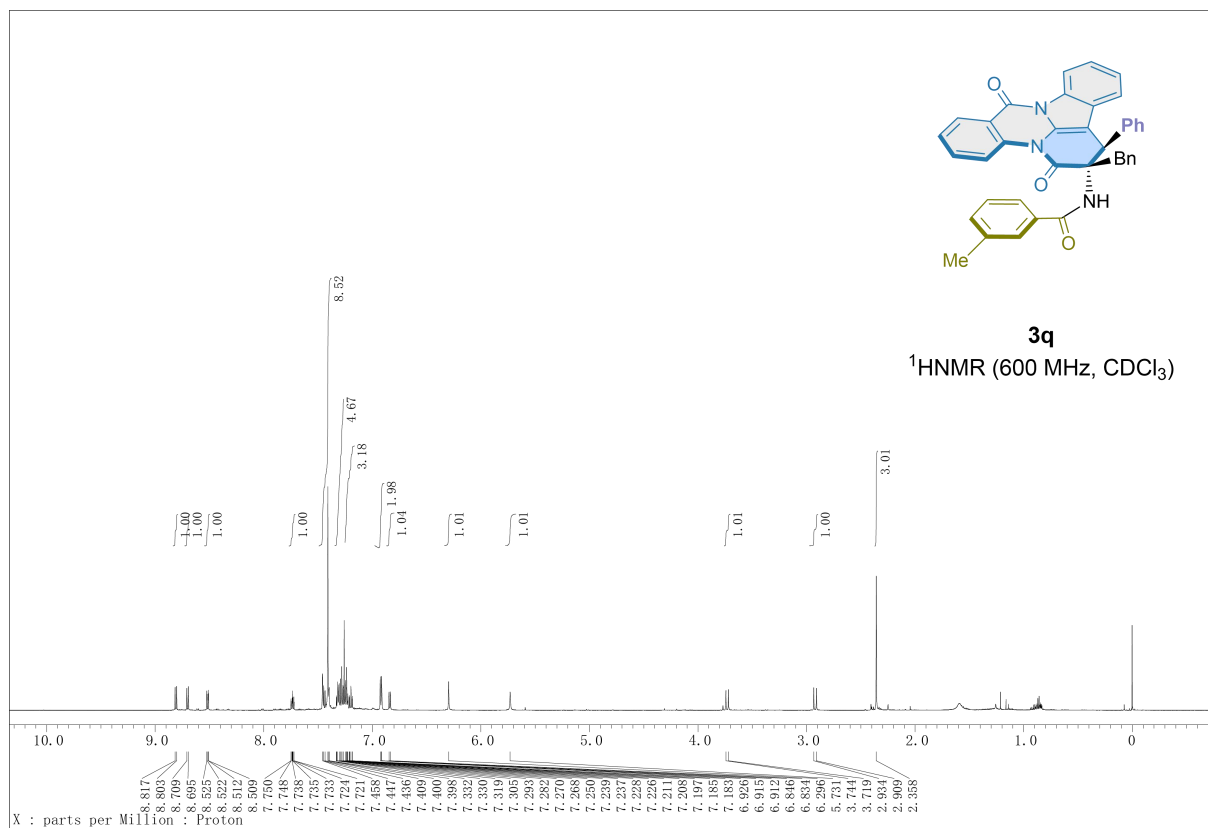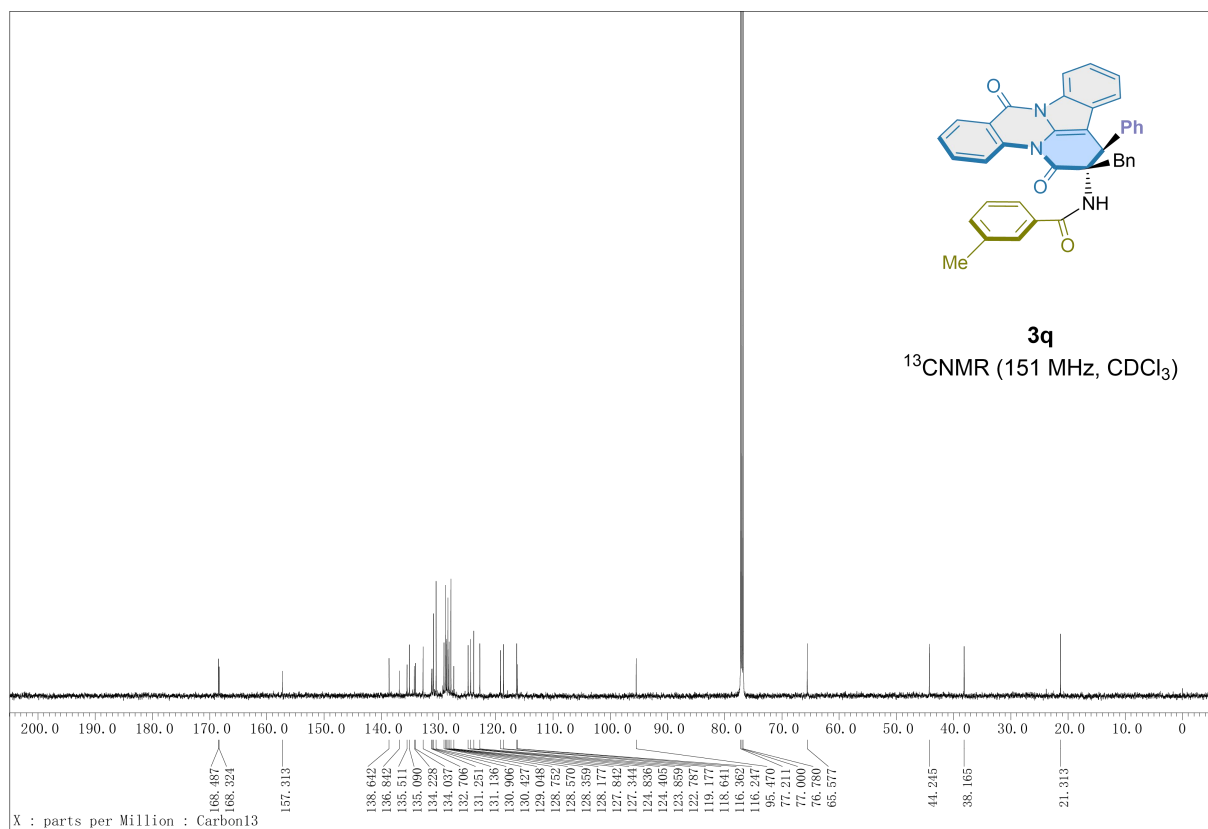

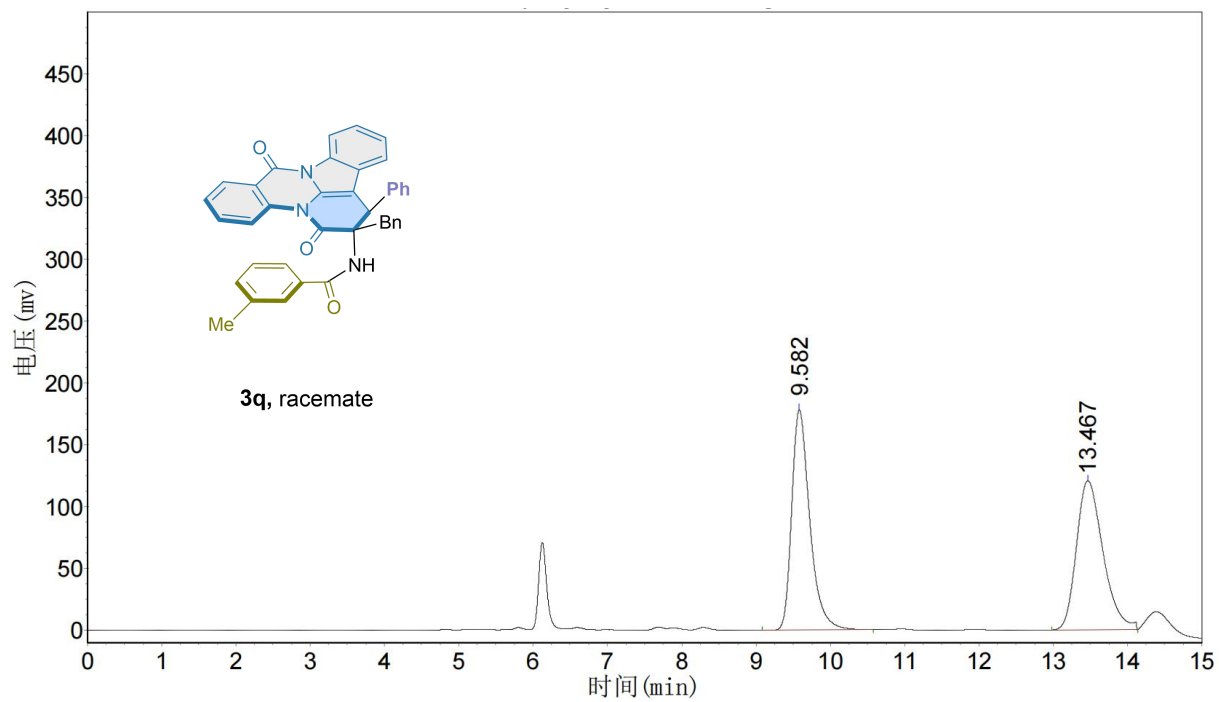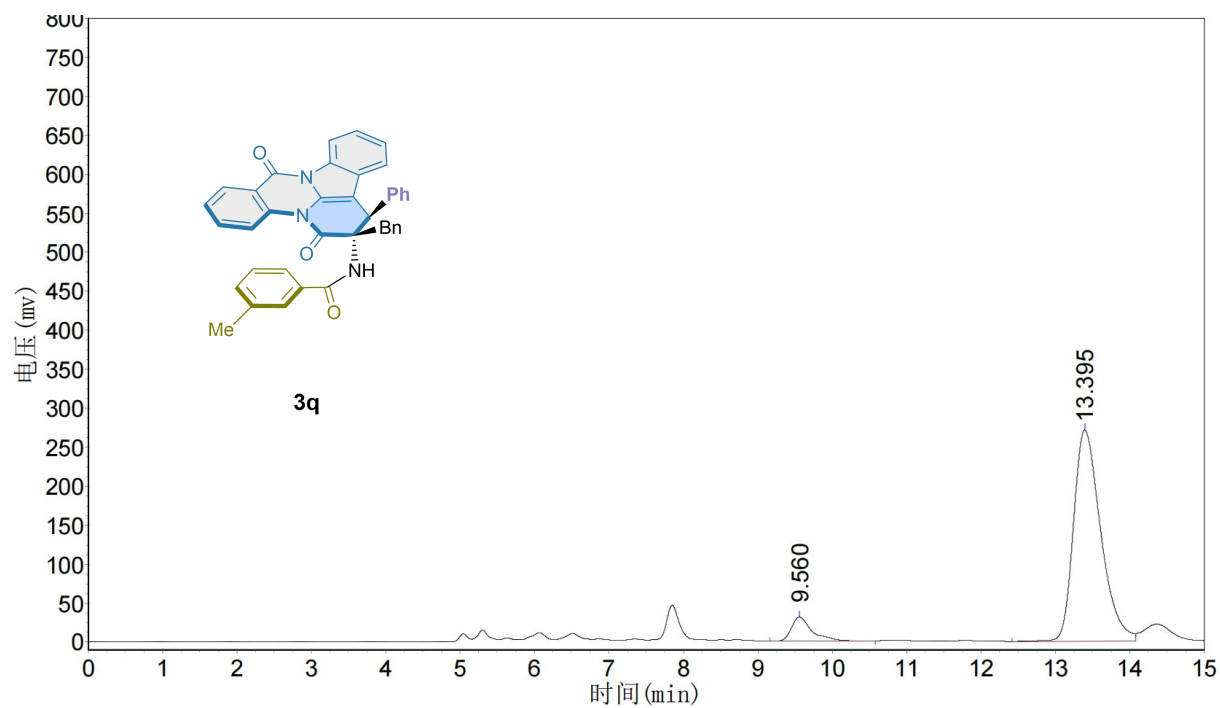

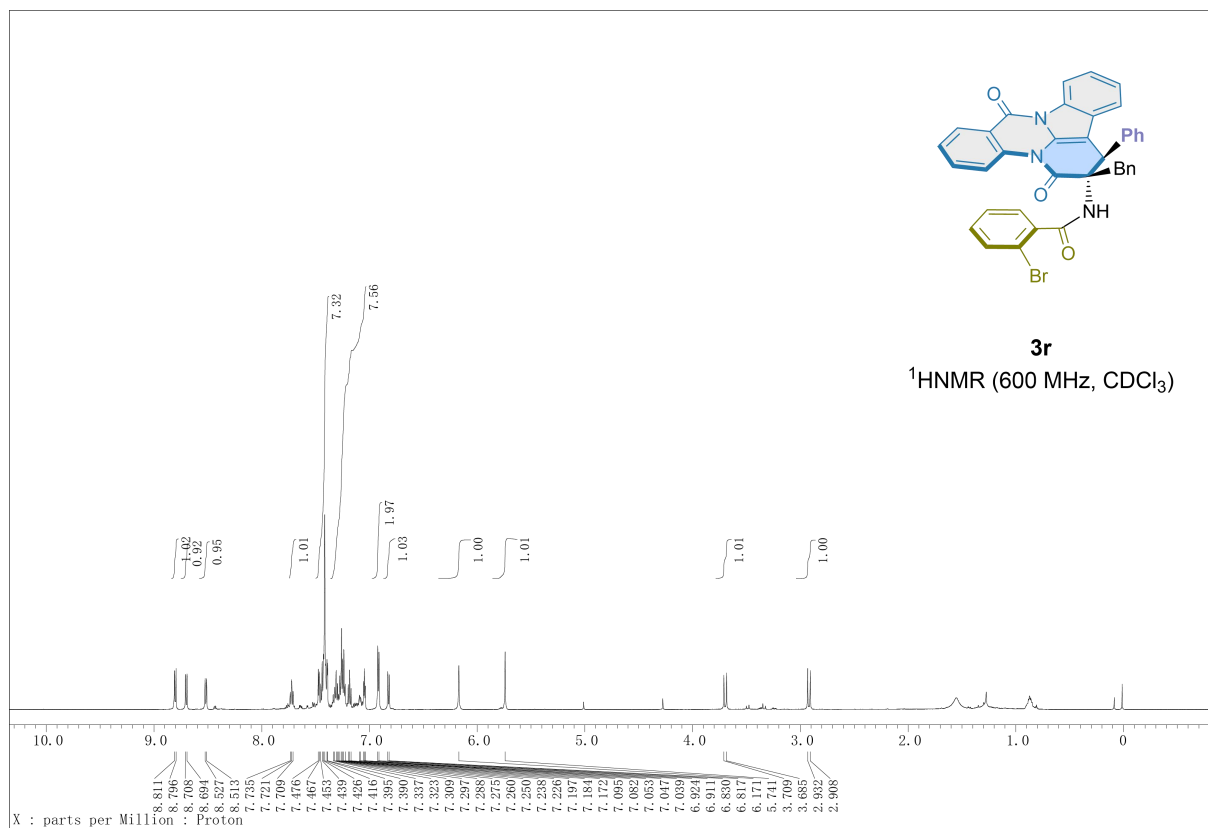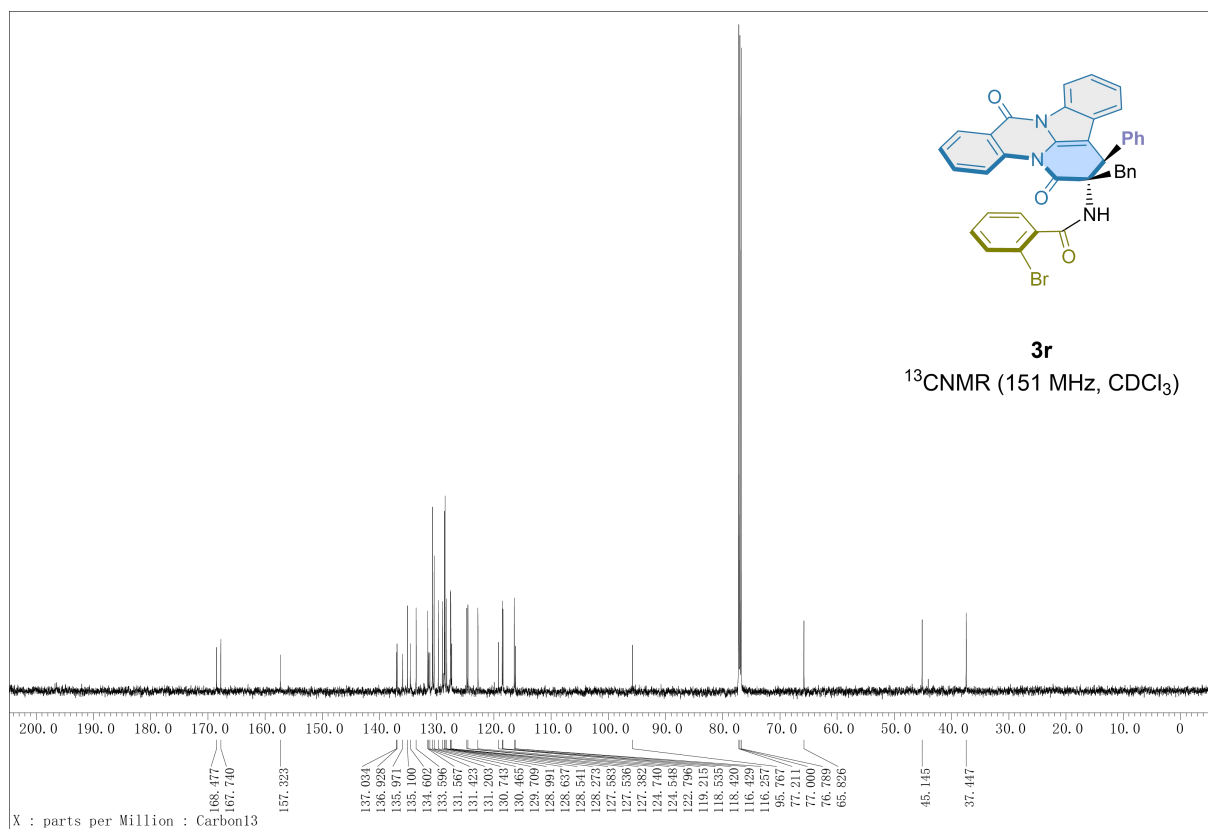

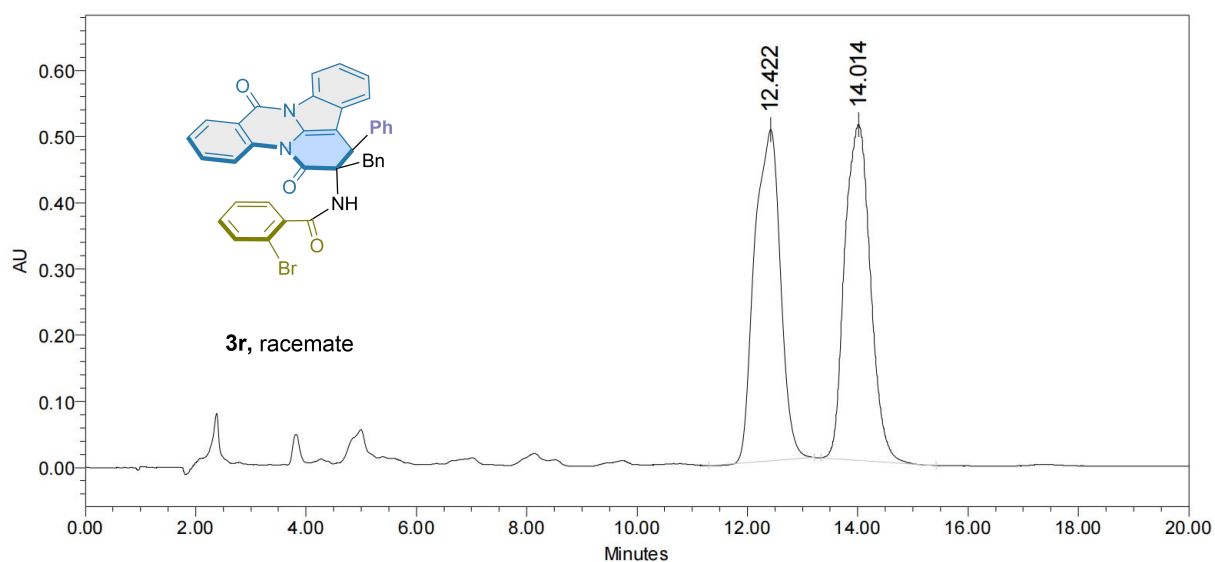

|   | Ret.Time(min) | Height( $\mu$ V) | Area( $\mu$ V*sec) | Rel.Area(%) |
|---|---------------|------------------|--------------------|-------------|
| 1 | 12.422        | 500774           | 16262955           | 49.68       |
| 2 | 14.014        | 507277           | 16475657           | 50.32       |

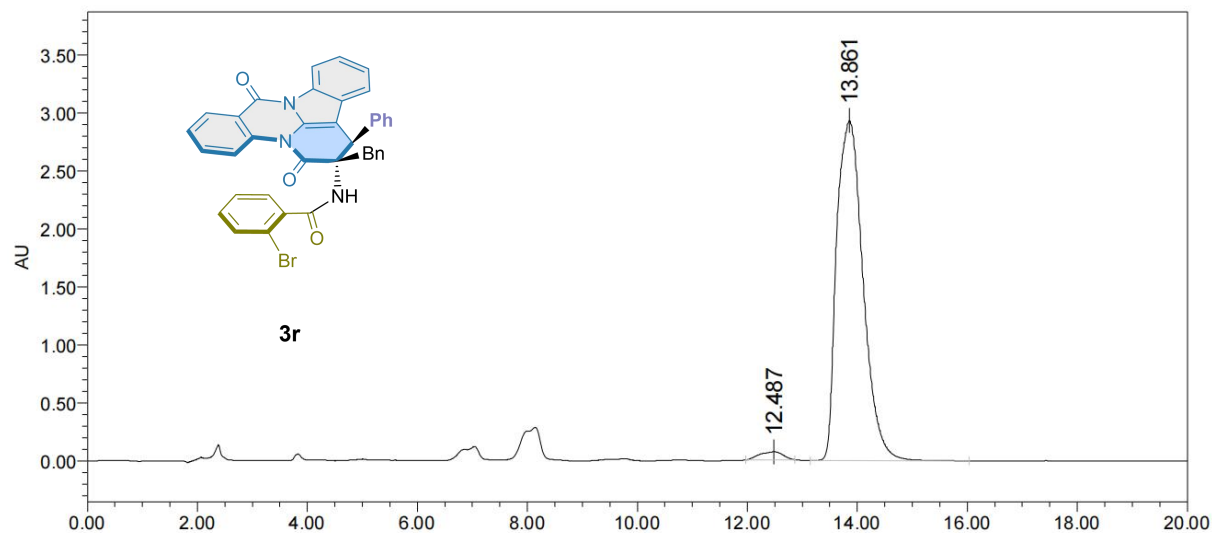

|   | Ret.Time(min) | Height( $\mu$ V) | Area( $\mu$ V*sec) | Rel.Area(%) |
|---|---------------|------------------|--------------------|-------------|
| 1 | 12.487        | 68619            | 2037221            | 2.03        |
| 2 | 13.861        | 2931377          | 98151326           | 97.97       |

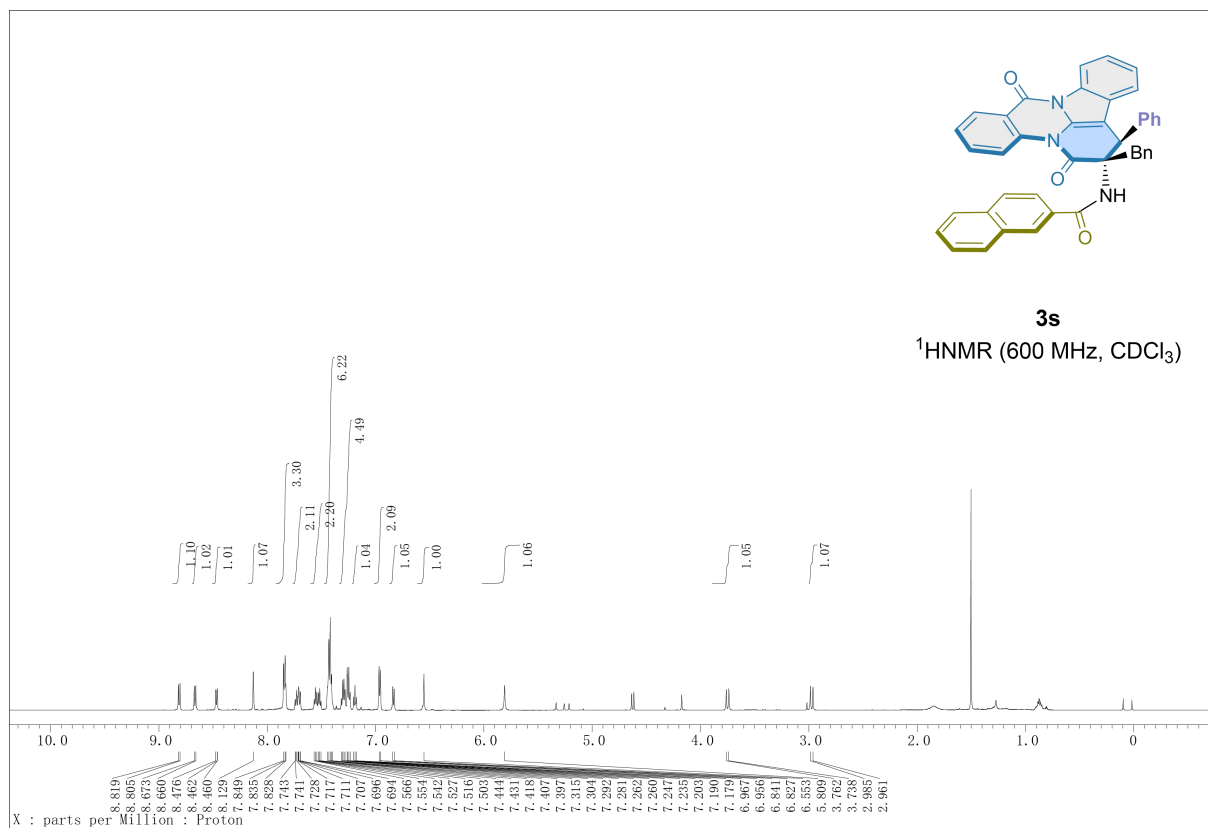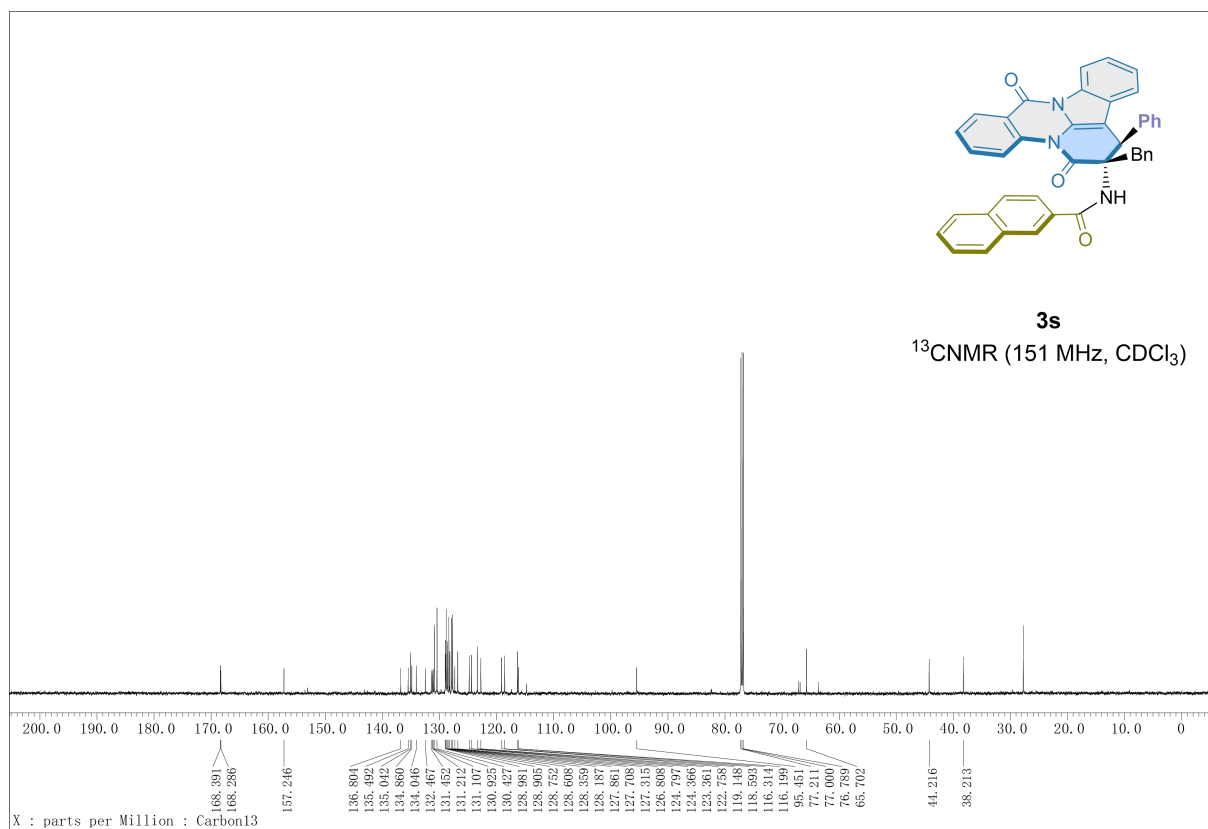



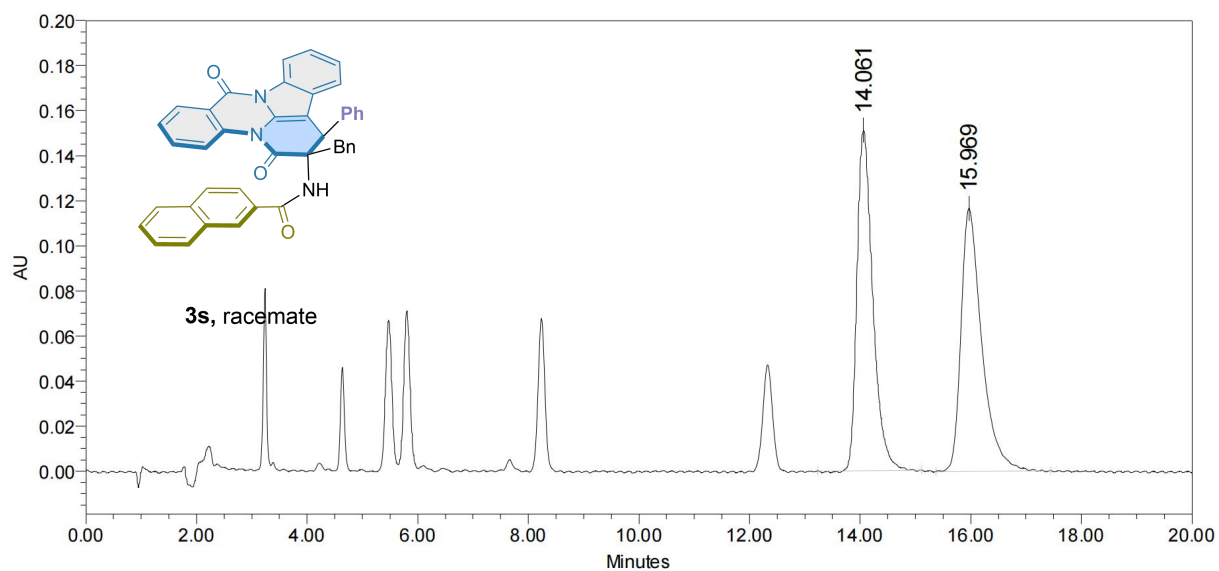

|   | Ret.Time(min) | Height(μV) | Area(μV*sec) | Rel.Area(%) |
|---|---------------|------------|--------------|-------------|
| 1 | 14.061        | 151179     | 3021103      | 49.91       |
| 2 | 15.969        | 116622     | 3031748      | 50.09       |

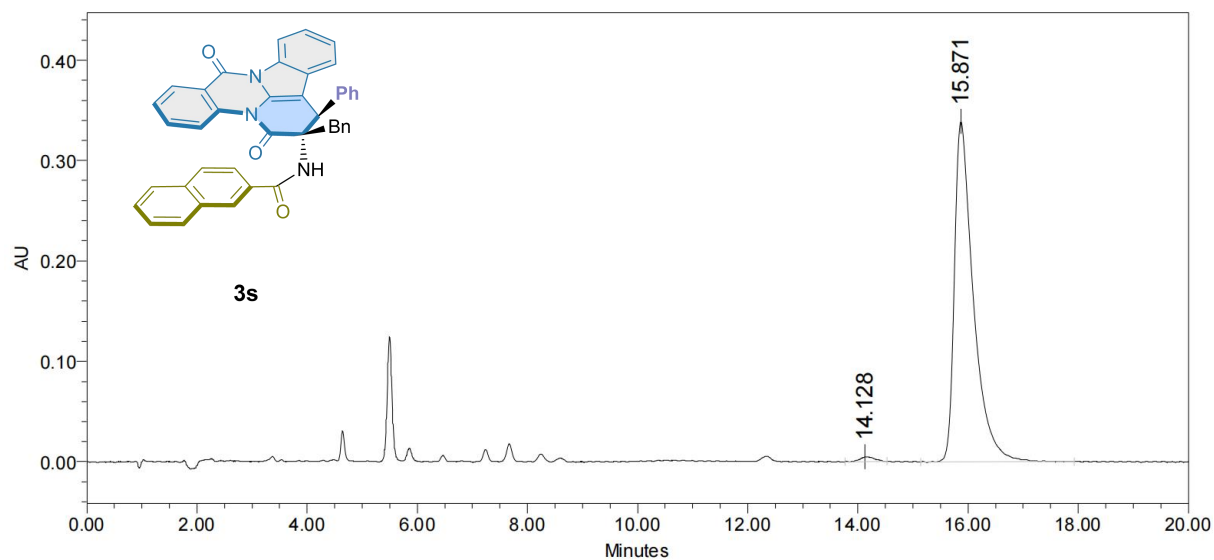

|   | Ret.Time(min) | Height(μV) | Area(μV*sec) | Rel.Area(%) |
|---|---------------|------------|--------------|-------------|
| 1 | 14.128        | 4662       | 87081        | 1.07        |
| 2 | 15.871        | 339099     | 8088334      | 98.93       |

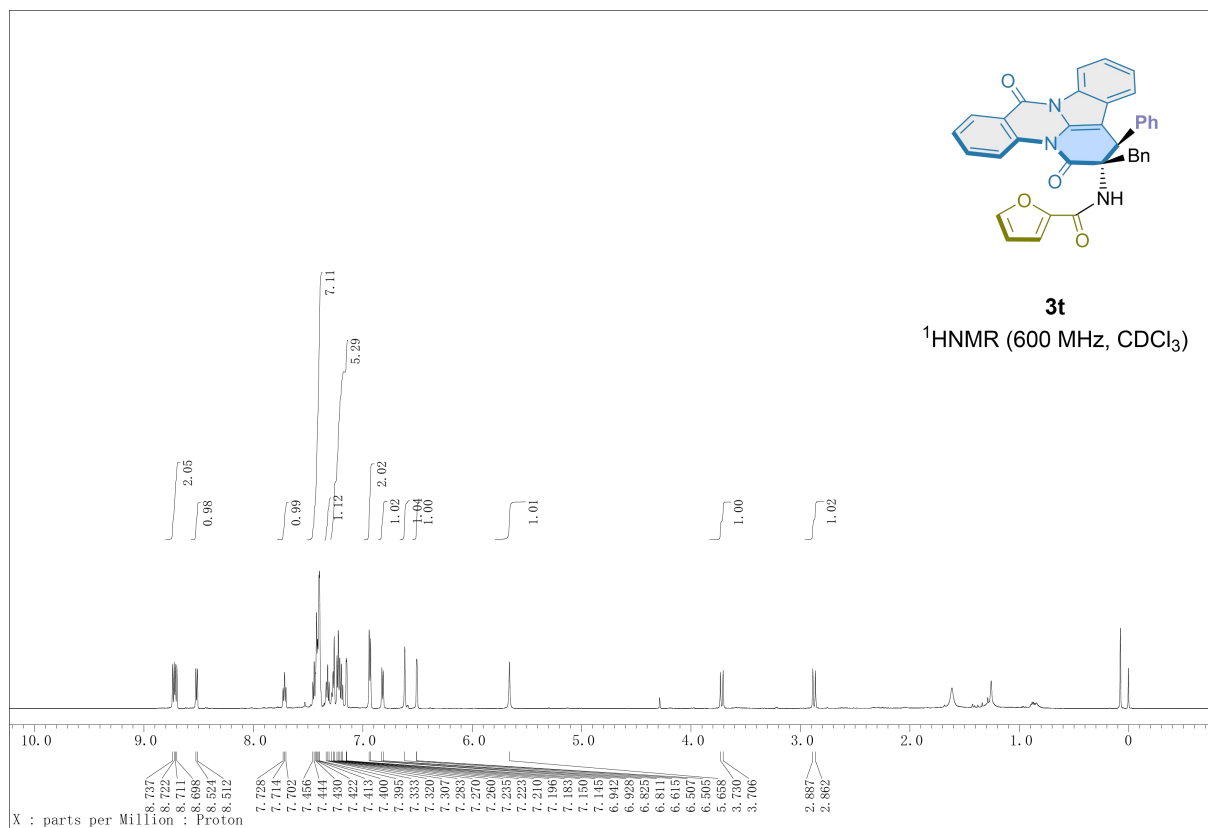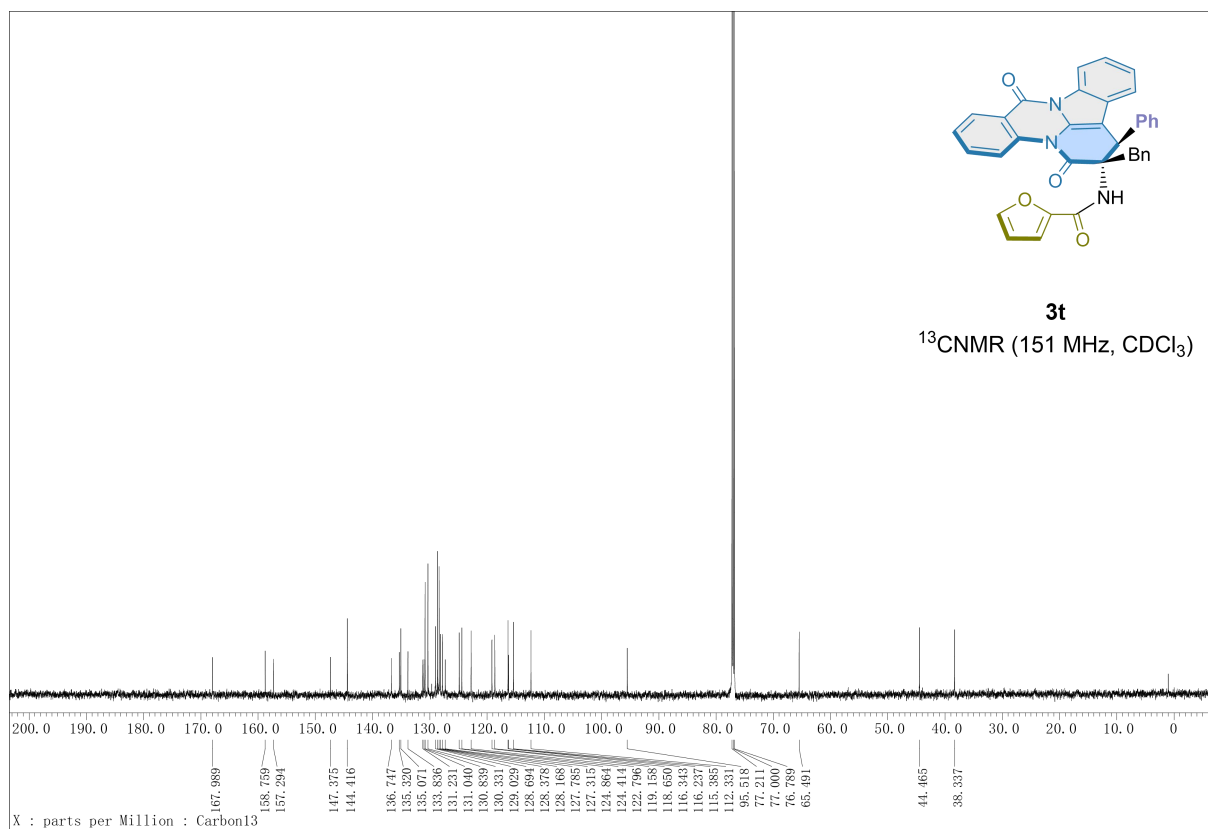

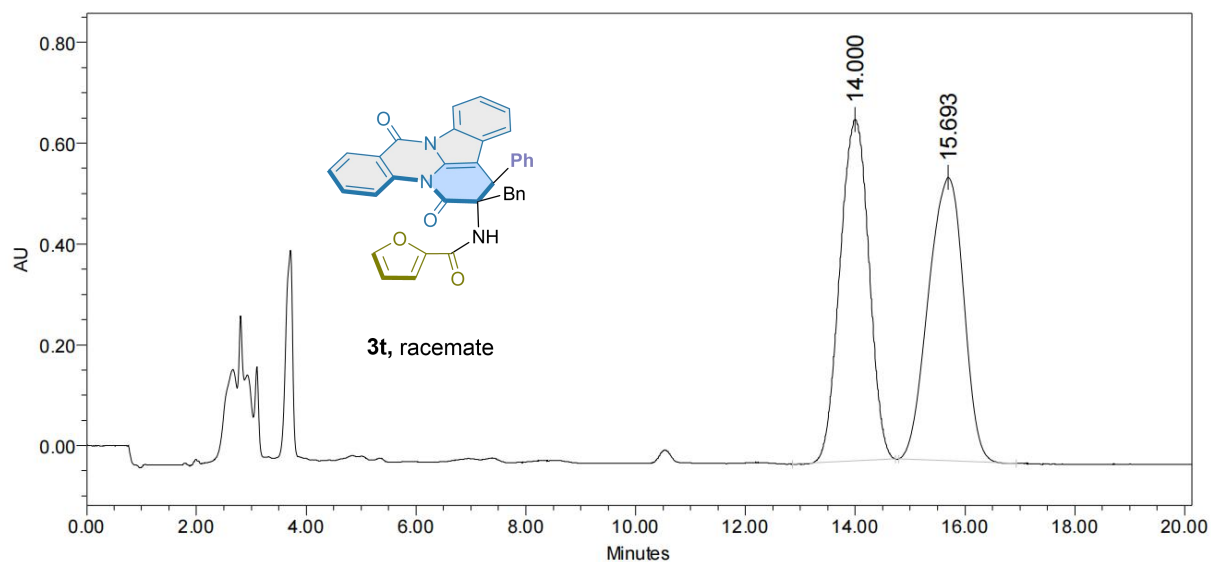

|   | Ret.Time(min) | Height(μV) | Area(μV*sec) | Rel.Area(%) |
|---|---------------|------------|--------------|-------------|
| 1 | 14.000        | 677927     | 24948759     | 50.00       |
| 2 | 15.693        | 562266     | 24953227     | 50.00       |

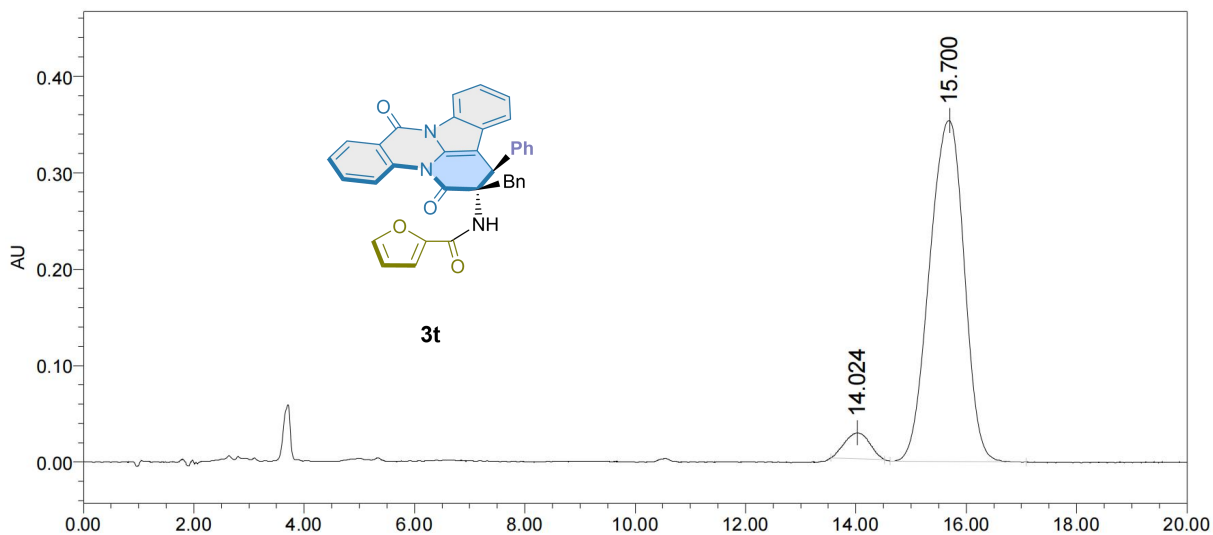

|   | Ret.Time(min) | Height(μV) | Area(μV*sec) | Rel.Area(%) |
|---|---------------|------------|--------------|-------------|
| 1 | 14.024        | 26824      | 851140       | 5.25        |
| 2 | 15.700        | 353387     | 15347832     | 94.75       |

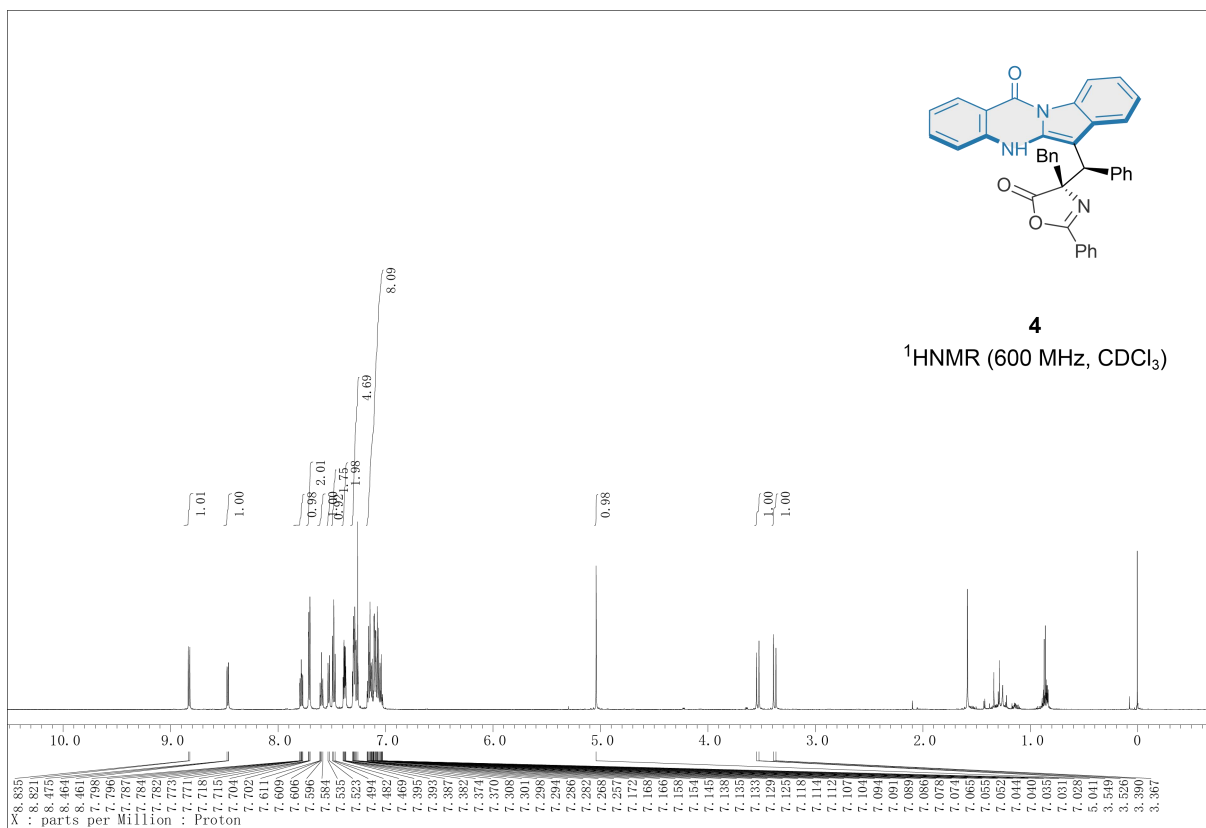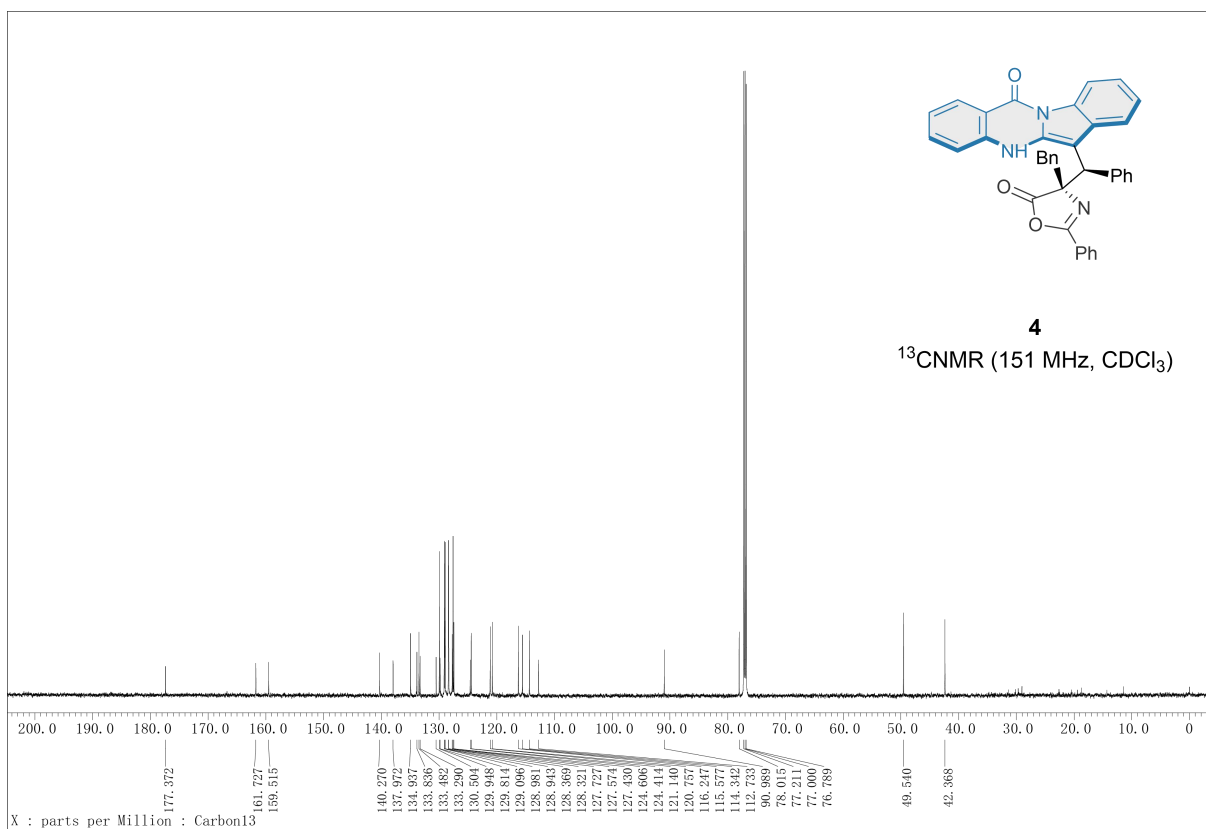

Supplement: d3qo02029k1.pdf [file d3qo02029k1.pdf]
